# Supplementary material for: The STAT3 HIES mutation is a gain-of-function mutation that activates genes via AGG-element carrying promoters
Source: PubMed Central journal article supplement (PMC4605325; doi:10.1093/nar/gkv911), 2015-10-10
Supplement: supp_gkv911_nar-00708-m-2015-File003.pdf [file supp_gkv911_nar-00708-m-2015-File003.pdf]

## **SUPPLEMENTALDATA**

**Figure S1. Sequence used for SIE-Luc, S6-SIE-Luc, and AGG-Luc constructs**

**Figure S2. Human TNF- $\alpha$  promoter sequence used for luciferase reporter (TNF-Luc) construction**

(A) Human TNF- $\alpha$  promoter sequence analysis.

(B) Alignment between human and mouse TNF- $\alpha$  promoter.

**Figure S3. The AGG elements of a human Alu consensus sequence**

**Figure S4. STAT3 mutants on AGG-Luc and SIE-Luc luciferase reporter activity**

The regulation of STAT3 mutants (R382Q, R382W, R423Q, V463del, S465A) on AGG-Luc and SIE-Luc reporter was test, experiment method is same as Figure 6D.

**Appendix 1.** promoter of STAT3 binding sequence

**Appendix 2.** The sequence from chip-clone results

|              |                                                               |                                      |
|--------------|---------------------------------------------------------------|--------------------------------------|
|              |                                                               | <b>HindIII-sequence (5'-3')-SalI</b> |
| Luc-SIE      | ACAACAGCCTGAT <u>TTC</u> <u>CCCCGAA</u> ATGACG                |                                      |
| Luc-STAT6    | AGCTTC <u>TTCATCTGAA</u> AAGAGCTTC <u>TTCATCTGAA</u> AAG      |                                      |
| Luc-AGG      | TTAGTCACTACTCTGCACTGAAAGGCTGTGCGCGG <u>AGGGCGAGG</u> GAGGGGCC |                                      |
| Luc-AGG- Δ 1 | TTAGTCACTACTCTGCACTGAAAGGCTGTGCGC----- <u>GCGAGG</u> GAGGGGCC |                                      |
| Luc-AGG- Δ 2 | TTAGTCACTACTCTGCACTGAAAGGCTGTGCGCGG <u>AGGGCG</u> -----GGGCC  |                                      |

**Figure S1. SIE-Luc, STAT6-SIE-Luc, and AGG-Luc constructs**

**A Human TNF-α promoter**

(-1076) CCAGGGCTATGGAAGTCGAGTATGGGGACCCCCCTTAACGAAGACAGGGCCATGTAGAGGGCCCCAGGGAGTGAAAGAGCCTCCAGGACCTCCAGG TATGGAATACAGGGGACGTTTAAAGAAGATATGGCCACACACTGGGGCCCTGAGAAGTGAGAGCTTCATGAAAAAATCAGGGACCCAGAGTTCCTTGGAAGCC AAGACTGAAACCAGCATTATGAGTCTCCGGTTCAGAAATGAAAGAAGAAGGCTGCCCCAGTGGGGTCTGTGAATTCCTGGGGGTGATTTCACCTCCCCGGGCTG TCCCAGGCTTGTCCTGTACCCCCACCCAGCCTTTCTTGAGGCCTCAAGCCTGCCACCAAGCCCCAGCTCCTTCTCCCCGACGGGACCCAAACACAGGCCTC AGGACTCAACACAGCTTTTCCCTCCAACCCCGTTTTCTCTCCCTCAAGGACTCAGCTTTCTGAAGCCCCCAGTTCAGTTCATCTTTTCTGCATCCTG TCTGGAAGTTAGAAGGAAACAGACCACAGACCTGGTCCCCAAAAGAAATGGAGGCAATAGGTTTTGAGGGGCATGGGGACGGGGTTCAGCCTCCAGGGTCCCTAC ACACAAATCAGTCAGTGGCCAGAAAGACCCCTCGGAATCGGAGCAGGGAGGATGGGGAGTGTGAGGGGTATCCTTGATGCTTGTGTGTCCTCAACTTTCCAA ATCCCCGCCCCGCGATGGAGAAGAAACCGAGACAGAAGGTGCAGGGCCCACTACCGCTTCTCCAGATGAGCTCATGGGTTTCTCCACCAAGGAAGTTTCCG CTGGTTGAATGATTTCTTCCCCGCCCCCTCTCGCCCCAGGGACATATAAAGGCAGTTGTTGGCACACCCAGCCAGCAGACGCTCCCTCAGCAAGGACAGCAGA GGACCAGCTAAGAGGGAGAGAAGCAACTACAGACCCCCCTGAAAAACAACCTCAGACGCCACATCCCCTGACAAGCTGCCAGGCAGGTTCTCTTCTCTCACA TACTGACCCACGGCTCCACCTCTCTCCCCTGAAAGGACACCATGAGCACTGAAAGCATGATCCGGGACGTGGAGCTGGCCGAGGAGCGCTCCCCAAGAAGA CAGGGGGCCCCAGGGCTCCAGGGGTGCTTGTTCCTCAGCCTCTTCTC (+109)

The deleted sequence in Luc-TNF-Δ1: from -198 to -498 (marked with underlined)  
 The deleted sequence in Luc-TNF-Δ2: from -285 to -349 (marked with Italic shadow)

**B lignent between human and mouse TNF-α promoter**

Human : TCCTTGATGCTTGTGTGTCCTCAACTTTCCAAATCCCC-GCCCCGCGATGGAGAAGAAACCGAGACAGAAGGTGCAGGGCCCACTACCGCTT  
 Mouse : TCCTTGATGCTTGGGTGTCTCAACTTTCCAAACCTCTGCCCCGCGATGGAGAAGAAACCGAGACAG-AGGTGTAGG-CCACTACCGCTT

Human : CCTCCAGATGAGCTCATGGGTTTCTCCACCAAGGAAGTTTCCGCTGGTGAATGATT-CTTT-CCCCGCCCTCTCGCCCCAGGGACATA  
 mouse : CCTCCACATGAGATCATGGTTTTCTCCACCAAGGAAGTTTCCGAGGGTGAATGAGAGCTTTTCCCCGCCCTC-T-TC-CCCAAGG-C-TA

Human : TAAAGGCAGTTGTTGGCACACCCAGCCAGCAGACGCTCCCTCAGCAAGGACAGCAGAGGACCAGCTAAGAGGGAGAGAAGCAACTACAGA  
 Mouse : TAAAGGCGGCGCTCTGCACAGCCAGCCAGCAGAAGCTCCCTCAGCGAGGACAGCAAGGACTAGCCAGGAGGAGAACAGAACTCCAGA

**Figure S2. Human TNF-α promoter sequence (GeneBank: KF887971.1) used for luciferase reporter (Luc-TNF) construction.**

GGCTGGGCGTGGTGGCTCACACCTGTAATCCCAGCACTTTGGAGGCCGAGGTGGGTGGATCACCTGAGGTCAGGATTCAAGACCAGCCT GGCCAACATGGTGAACCCCGTCTCTACTAAAAATACAAAAATTAGCCGGGCGTGGTGGCGCGCCCTGTAATCCCAGCTACTCGGGAGG CTGAGGCTGGAGATCGCTTGAACCCAGAGGTTGAGGTTGCAGTGAGCCGAGATCGGCCACTGCACTCCAGCCTGGGCAACAGAGCGAG ACTCCATCTC

**Figure S3. The "AGG" elements of an human Alu consensus sequence**

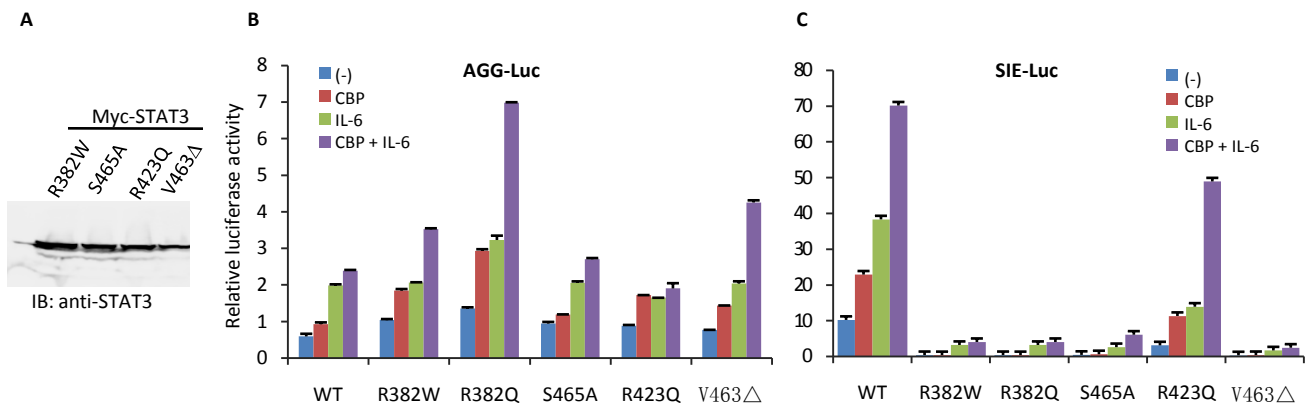

Figure S4. STAT3 mutants on Luc-AGG and Luc-SIE luciferase reporter activity analysis.

## Appendix 1

### promoter of STAT3 binding sequence

| syml          | ref_NM       | TAG_SEQ                                                                                               |
|---------------|--------------|-------------------------------------------------------------------------------------------------------|
| Ptma          | NM_008972    | CTCCCGCTCCCCCTCCTCCCTCCCTCCCTCCTTCTTCCGAGCAGTCGCGAGGGAGGGGGAG                                         |
| Mrpl30        | NM_027098    | TCCTGGGCACCGCCAGCAAATTCCAAGAGCTGACCCACTGCGCTTCCAGGAAGCGCACGCGTGAC                                     |
| Mitd1         | NM_026913    | TCCTGGGCACCGCCAGCAAATTCCAAGAGCTGACCCACTGCGCTTCCAGGAAGCGCACGCGTGAC                                     |
| BC031781      | NM_145943    | GCTCGCCCTTTATAGCCAGTCCCTTGAGCCCCGCCCTAGCAACCGCCCCTAGCAACGCCTAGCTCCAGCG                                |
| Eya1          | NM_010164    | GGAAGGGCCGGAAGGGCCTCGAACTTTCCAGTAAAAGATGTCTTCTCCTCCTCTGCTTACCCCGTAGATTAAGCACCC                        |
| Tmbim1        | NM_027154    | TCAGCAGCAGCGCATAAAAAGCCAAGTGGAGTAGCACAGGCCTAGAGTCCCACGCTTGTTATGGAGATGTCATGCCAGGAAACGTTCAAGAACTTCAAAAA |
| Ddx59         | NM_026500    | GGGAATGCGCGGGATGCGGGCGTTGCCTGGAGCCGGAGGAGGAGTTGTGCGCTCTGCCGC                                          |
| Ddx59         | NM_178052    | GGGAATGCGCGGGATGCGGGCGTTGCCTGGAGCCGGAGGAGGAGTTGTGCGCTCTGCCGC                                          |
| 4930523C07Rik | NM_001024470 | TAGCAGAGCTGGGTGCGGTGAAACCTCAGCCAGGGACGCAGGGGGCGCTTTCCTCCACATCACACTGGTGGCACCCAC                        |
| Psen2         | NM_011183    | TTCCAAAACCCCTGGAAAGTCCCAGTCTTCTCCACACTAGGGAAGGGTTTCCCCCCTAACAGGGTACGCCCTGCGACATCTCACACA               |
| Lefty2        | NM_177099    | TCTGCCCACTGTAAAAGTTTCTTAATCCACATCTGCTTCTTCTTTGGGCCGTGGCTAATTGCCCAATCACTGTATTTCCCA                     |
| 4930511H11Rik | NM_030025    | AACTACGTTTCCCAGCGTGCTCTGCTGGAAACACAATGGAGTTTGGCGTCATCCGGGTCACGTGGTCTCGCGTTT                           |
| Ctdsp1        | NM_153088    | CTTCAAGGGCAAGCGGGACACAGGTGAGAGGAGGGTGCTTTCCTCCAGGGCCGCAGAAGCCACCTCCG                                  |
| Paqr8         | NM_028829    | CTGGGCAGCCCTCCCCTGGGCCGGGAAAGGGCGGAGCTGGGCGTCGCCATCCGGGTTGTCCCCTCCTCCCGCCGCTCTC                       |
| Slc41a1       | NM_173865    | CTGAGTTCCCGTCACTCTGCTGCGTTTTTCCCCCTCACCCCGCCCCAGCTCAAGAAACGCCGGGAAATGGGCGGGGCTGGGCGGG                 |
| Fn1           | NM_010233    | CACGCGCGCAAAAACCTTAGCCACAACCTTGAGCGGGCGCTTGAGGACCAACCCATCCCTGCCGC                                     |
| Cul3          | NM_016716    | GTGGGCGGGGAATTTCCGGAAGGGGGAGAGGGAGTGTGTGTGTGGGCTGGCGGGGCT                                             |
| Uck2          | NM_030724    | GACATTGCAGTTGACAGTCCTTTGTCTGCCTGCCCCCTCCTGAAGCACCAACACCCCTCCTTCTAGC                                   |
| Tomm40l       | NM_001037170 | TTTTTAAAGGGTGGGGGGCCATCCCCGTATGCCAGGAAAGCGAGCTCAGCTGCTCAGCAGGTA                                       |

|               |              |                                                                                                    |
|---------------|--------------|----------------------------------------------------------------------------------------------------|
| Rrs1          | NM_021511    | CCCCGCGAGAAGCCGCTGCCCCGACCACGGCCGCTCACCCGCTGGCAGCAGTTCGCGCGCCTT                                    |
| Adhfe1        | NM_175236    | CCCCGCGAGAAGCCGCTGCCCCGACCACGGCCGCTCACCCGCTGGCAGCAGTTCGCGCGCCTT                                    |
| Slc9a2        | NM_001033289 | CCCAGCAGGGAGGAAAAGGGTTAGGCTCTGCCTGTTTCAGTAAATCTTTACAAGGAAACAGAATCTTCACAGGCAGTTCACCTTCAAAGCTGGAAAAC |
| Hrb           | NM_010472    | GAGGAAGATAGCCTGCTTACACGAAGCTCTTTGACGTACAGGCACCCAGCGGATAAGGGCTGTAATTTATTGAC                         |
| Fbxo36        | NM_025386    | GGGCTCCTCCGCTGGGCCAGCCCCGCTCCCTATTGACAGCGCATCCTGTGCCCCCTCCCTCCGCAACGTTCAACTCGA                     |
| Trip12        | NM_133975    | GGGCTCCTCCGCTGGGCCAGCCCCGCTCCCTATTGACAGCGCATCCTGTGCCCCCTCCCTCCGCAACGTTCAACTCGA                     |
| Mybph         | NM_016749    | GTGGGGTATGAGGACAAGGAGAGTGTCAAAAAC AAGGTAGGTTTCTCAGAAGCCACACCCCGGAACAAAGAAGGAGAGGC                  |
| 2310003C23Rik | NM_029607    | CGTTCCTATCCGGCAGTGTTAAAGAGCCTCCAACTTCCCCCATCCCTTACCGGAATATCTAACCCAT                                |
| Sulf2         | NM_028072    | CTCAGTCTCCCAGTTGGGACTGAGCGCTGGAGGAGGGTGGTATCATGTGATTTCTCTTATGT                                     |
| Mybl2         | NM_008652    | ACTCCCAGGTTTGACTGCCCCGGGATTCTAGGAATGCTCTCCCCAGGGGTTATGTGTTGACTTGCTGATA                             |
| Cstad         | NM_030137    | CTCCGCCCAGCTGGGGGTGGTGTCTTCCGGGAAGTTGAGGGGTCGCACCTGGGAGGGAGGGGGAACCTATCCGGTGC                      |
| Rpap1         | NM_177294    | GTCTTCTGCCCTTCATCCACACCCACCCACCCCACTAGAGTGTTGGGAGCTACCACA                                          |
| Prei4         | NM_001042671 | TGGCCCGACAGCCTTAGCCCATCTGGCTGGGGTCAGCTGAGGTAAGGTCAAGGTGG                                           |
| Prei4         | NM_001042672 | TGGCCCGACAGCCTTAGCCCATCTGGCTGGGGTCAGCTGAGGTAAGGTCAAGGTGG                                           |
| Prei4         | NM_028802    | TGGCCCGACAGCCTTAGCCCATCTGGCTGGGGTCAGCTGAGGTAAGGTCAAGGTGG                                           |
| Ndufa8        | NM_026703    | AAGCGTAAGCCATTCCAGGAAGTCTAGCGGTCCCAGGGGCGGGGCTTCATCTGGTCTCCG                                       |
| 1700010A17Rik | NM_029309    | AAGCGTAAGCCATTCCAGGAAGTCTAGCGGTCCCAGGGGCGGGGCTTCATCTGGTCTCCG                                       |
| Wfdc2         | NM_026323    | TGCCTTCCCCTCCCCTCACACTAATCCACATTCCGGTAAGAGAGGGGCCAGTCAGCCAGGGAT                                    |
| Mdk           | NM_001012335 | CCTGCAGGAGCGGGAAAATCAGCTCCGCCCCAGGCGCTGTGAGCCTAAGGCCCTAGGCAGAGGT                                   |
| Mdk           | NM_001012336 | CCTGCAGGAGCGGGAAAATCAGCTCCGCCCCAGGCGCTGTGAGCCTAAGGCCCTAGGCAGAGGT                                   |
| Mdk           | NM_010784    | CCTGCAGGAGCGGGAAAATCAGCTCCGCCCCAGGCGCTGTGAGCCTAAGGCCCTAGGCAGAGGT                                   |
| Ada           | NM_007398    | CCCCCCCCCGCCTGCAACTCTGGCGCGCATTCCCGGAATTCTGAACCCAGACCTTCCCTGCTGGCTACACCCTAGGAAGCTCC                |

|               |              |                                                                                                                                          |
|---------------|--------------|------------------------------------------------------------------------------------------------------------------------------------------|
| 3300002I08Rik | NM_027017    | GGCACACGGAACATGCCAAGCAGAAATACTCAGGATTGCCCTGCTTCACAGAAAGGGCCATACAGAAACC                                                                   |
| Cpne1         | NM_170588    | CAACACCTCCACAGCCGCTTCACAAAATGGCCGCCCGCCGCTCCGGCGCTCCGCGTCCCGGAGTAGGCGGGGCGCCGCTGCCGACGTCA                                                |
| Cpne1         | NM_170590    | CAACACCTCCACAGCCGCTTCACAAAATGGCCGCCCGCCGCTCCGGCGCTCCGCGTCCCGGAGTAGGCGGGGCGCCGCTGCCGACGTCA                                                |
| Rbm12         | NM_170598    | CAACACCTCCACAGCCGCTTCACAAAATGGCCGCCCGCCGCTCCGGCGCTCCGCGTCCCGGAGTAGGCGGGGCGCCGCTGCCGACGTCA                                                |
| Rbm12         | NM_029397    | CAACACCTCCACAGCCGCTTCACAAAATGGCCGCCCGCCGCTCCGGCGCTCCGCGTCCCGGAGTAGGCGGGGCGCCGCTGCCGACGTCA                                                |
| Rif1          | NM_175238    | AAATCTCAATGGAAGGAATGTGGGTGGTGGGGTAAAGGACGGAAAGATTCCACGGATTCCCCACT                                                                        |
| Cstf3         | NM_145529    | TGTTTCAGGGGGTAGTTCTGATCACCTGGCAACCGCACCTTTGTTTCAGGGGTTAGTTCTGATCACCTGGCAACCGCACCTTTGTTTCAGA                                              |
| Cstf3         | NM_177253    | TGTTTCAGGGGGTAGTTCTGATCACCTGGCAACCGCACCTTTGTTTCAGGGGTTAGTTCTGATCACCTGGCAACCGCACCTTTGTTTCAGA                                              |
| Cstf3         | NM_001037326 | TGTTTCAGGGGGTAGTTCTGATCACCTGGCAACCGCACCTTTGTTTCAGGGGTTAGTTCTGATCACCTGGCAACCGCACCTTTGTTTCAGA                                              |
| Asx11         | NM_001039939 | GAATCAAAAAAAAAAGCTTTGAACGGGTAAACCGCGCGCGGCCAGGGGGAGTCCAGCCACCGCCCTTCCAGCACCACTCCAGAAACCCCTCAGGCCTCC<br>GCTAGTTCCCGAACCTCGCGAGACCCCGCCCCA |
| Endog         | NM_007931    | AACCAAAACCAGAAAAATACAGTTTGCAGTAACAAGTGCCAACCAGAAAGGTGGCGCTCTCACACATGACAACCTCA                                                            |
| Adal          | NM_029475    | CGGCGTGCGCCGCACGGGTCCCGGGACCAGCAGCGCCGCAAAGGGGTGCGGCACGTATCCGTGTGCGG                                                                     |
| Slc27a2       | NM_011978    | GCGGTGCGTTTATAAGGTACTTGATTAAGCAAAGGCACTGCGCTGTGTGATAAGAATAACTAACC                                                                        |
| Rab14         | NM_026697    | CGCAGCCAGCGGAGCCCGGAAGAGGGTGGTGGAGACTAACCTGACGGCCACGCCCCCTCGTCAGTTCGCCCTCCGGAGTAGACCCGCTCGGCCTCGGCCCCG<br>CCCCACTG                       |
| Rbm18         | NM_026434    | GCTTCGGGTACTCACCTGCTAGCCTCAGAGCTGTGCCCTCAGCTCATGCCCCGAAAGCAGCTTCCGACGCTGGGGT                                                             |
| Mrrf          | NM_026422    | GCTTCGGGTACTCACCTGCTAGCCTCAGAGCTGTGCCCTCAGCTCATGCCCCGAAAGCAGCTTCCGACGCTGGGGT                                                             |
| Orc4l         | NM_011958    | CAGCGCCTTGAGCCTTCTGGGAAAACCATCTCATTTCTCCCTCCCCCTCCTCCTTGCTTCCACCAACCAGCTCCCGTCAGAACGGGACATGCGCAGTGAG<br>TGCTCCCGTCTCGTCTCCCGAG           |
| Rif1          | NM_175238    | ACCTGTGTATCCCAGGGCCACCGTACCCCTCTACACCTGGGGTCCAATGGAAGTAAACCAATTC                                                                         |

|               |              |                                                                                                                                                                                                              |
|---------------|--------------|--------------------------------------------------------------------------------------------------------------------------------------------------------------------------------------------------------------|
| Pak6          | NM_001033254 | CCTCTCATTCTCTGTGTTTTTTGCTGAGTACCTTATCTCCCAGAGCTGCAGTTGGCTGTTGGCATCTTTTGGAGGAGGGGTGGGGCTTCTGGAATTC                                                                                                            |
| LOC433479     | NM_001013802 | ATTTTAGTTACAAATTAACATTTAGACCTATTGGCTATAAAAGGGCTAAGGGGCCACAGCAGT                                                                                                                                              |
| Nxt1          | NM_019761    | CAACATCCAATCAGAGCTCCCTCAACCGGATCTTCTAGGATAGTGCCTAACCCGGAACCTACTGTCTTTGCCGCCACA                                                                                                                               |
| Stx16         | NM_172675    | CCGCTCCCGAACGTTGCAAGCAATCTCATGAATGTCGCAGGGGGGCACCCGCGAGGAACGG                                                                                                                                                |
| Tmem79        | NM_024246    | CATTGACTGACGTCCTCCAAACCAGGTTTCATGTCCTTCATTTGCCCTCTCGCTATGTGACCTT                                                                                                                                             |
| Tpd52         | NM_001025263 | GCTGAGCACTGGGAAGCGGGCAGGGGAGGAGGCCATGCACATTCACAAACAAGCATCAGGAGTTG                                                                                                                                            |
| Tpd52         | NM_001025264 | GCTGAGCACTGGGAAGCGGGCAGGGGAGGAGGCCATGCACATTCACAAACAAGCATCAGGAGTTG                                                                                                                                            |
| Tpd52         | NM_009412    | GCTGAGCACTGGGAAGCGGGCAGGGGAGGAGGCCATGCACATTCACAAACAAGCATCAGGAGTTG                                                                                                                                            |
| Sox2          | NM_011443    | ATGCCAGGAAGTTGCGTGACCCCTCCCCCATCCCTGCACTCGGGAGCTTCTTTCCGTTGATG                                                                                                                                               |
| Cna2          | NM_009828    | TGATCTGGGATTAAGGCGTGTCTCTATGCCCGCATTCAGTAAACTACCCACCCCAACCCCAATTAAGATGGGTTA                                                                                                                                  |
| Mcl1          | NM_008562    | GCCCTTTCCCTTTTACGGGAAGTCTCGCTGCGTCAGCACGGCCCTAAGCGGGCGGCAGGGA                                                                                                                                                |
| 2700083E18Rik | NM_001029890 | CCTCTGAGATCCCGAACTGGGGGGCTGGGGGAGGGGAAGGGCTTGCTACCTCCGAGAAGAGAGGGAACACATCTTACCGGGGTCCCAACCCCAACC<br>GAACGCCCTTCTGGCCCC                                                                                       |
| Sox2          | NM_011443    | AACAGAGCTTTCCCAATACTGGTGGTCGTCAAACCTCTGCTAATTAGCAATGCTGAGAAATTCAGTTAACAAGGGCATTCTCC                                                                                                                          |
| Wdr77         | NM_027432    | GCAAGATGGCCGCTCGCACATCTCGGAGAAGAGATCAGCTCGCTTTTCTCGGAAGTTCTC                                                                                                                                                 |
| Dntip2        | NM_153806    | CTAGTCCGATGGCGGAGACCGCTGGCCAGAAGTGCAGTGGAGCCGGGAAGGAACGATTCTCC                                                                                                                                               |
| 2310010I16Rik | NM_025519    | CGAGCCCGCCAGGAAATGCCAAGAGTGGGTGTCACCTGCCGAAACAACCTGTTGATTCCCAGGAGCTCTGTCCGCTCCGACTGTGGCTTACCTGTCTC                                                                                                           |
| Tiparp        | NM_178892    | GACTCTCCCTCCCTCCTCCTCCTCCTCCCGAGCGCCGAGCCGCCGCGCCCTCCGTCC                                                                                                                                                    |
| Scamp3        | NM_011886    | CTGGGCTGCGGAGACTGGCTTAGGGATATCACGTGCGGTACTTCCCGCTTTTGGGTTTTTTTTTCTT                                                                                                                                          |
| Dennd4b       | NM_201407    | ACTTCCCGTCATTCCGCATGTGGGCGTTGGGACCCAAAGTGGCTCCAGTGCCGTTGTTTTCCCAAGGGAGAA                                                                                                                                     |
| Adh7          | NM_009626    | CGTTCTGCTGTTTTCCCTACTTAGGCTTTCATCTTACATCCTTTGTGCTAGCCCTTGTCCAGCCTCTCCCTGTTCCGAAAAGCATCACCTTCCATC<br>ATGCTTAATGCAAACCTGAATAGCTACAGCTGCGTGGTGAACCTCCATTCGGGCCTCTCAACTGTAGCCCGTGTGTGAGTGTGTGGAGGGTGAAAGAAGTCTTT |
| Cyp7b1        | NM_007825    | ATTAGGACATCCACTGGCT                                                                                                                                                                                          |

|               |           |                                                                                                                  |
|---------------|-----------|------------------------------------------------------------------------------------------------------------------|
| Pcdh18        | NM_130448 | AAACCCTATAGACAAACTCAGAAAACCTACCATAAGCAACTGGGACTTTAGAAAACCTCACAGCCATCTGGCCTATG                                    |
| Kpna4         | NM_008467 | TCGTTCTTTTCTCCCCGGTGTACTTGAGCGCTTCATTCACCTTTGGAAGGCAAAGAGGT                                                      |
| Hcn3          | NM_008227 | GCGCACCCACCGCTTCTCTAACTCTGGAAGGCGCAGGGGAAGCGGCTCACTGGCCCCAAGGGCC                                                 |
| Clk2          | NM_007712 | GCGCACCCACCGCTTCTCTAACTCTGGAAGGCGCAGGGGAAGCGGCTCACTGGCCCCAAGGGCC                                                 |
| Csf1          | NM_007778 | GCATTGTTCAAAGAATCTACTATACTACTATACTATCCTCTCCCCCTGGCTGTAGGGAGAAAGTGGGGAGCATCCAGCTACCTGGGTAGGAGAGGAAGGACTTGGTC<br>C |
| Ddah1         | NM_026993 | GGATTATTTAAACTTTGATATGTGAAAGAGGAAAAAGAACAGGCTTTGTATCACCATCAAAGAAAG                                               |
| Rpl22         | NM_009079 | TTCGCAGTGGGACAGCCCGTCTGACTCCTCCCTTTCCCGACAGCCGACTTCGCCTGGGA                                                      |
| 2410081M15Rik | NM_028603 | GCTAGGGCTCTGGAGACTTCCAGAACTGTTGGGGGAGCCTGGAAAAGTGTGCTGGGGAGCCTGGA                                                |
| Fabp3         | NM_010174 | GTGGGACTGCGGAGAAAGGCGCAGGCGGGAGACATTCCGCAGGGAGGGGCTAGCACGTGT                                                     |
| Spsb1         | NM_029035 | GCTCCTCACAGCCCTCCCCTCCGCACTTTCCCGCTTAGCCCCGCCCTACACCACGCCCTTCTC                                                  |
| Sdhb          | NM_023374 | CCCTTTAATGAGGCTACCTGGCAGAGAAGCCAGATTCAGGGTGAGTTCCAGAAAAGTGGCCC                                                   |
| Sep2          | NM_011327 | GCGTCGGGGGCGGGGCCGAGCGTCAGGGGCGGGGCCGAGTTACGGGAACCGACCGGAGGAGGCAGG                                               |
| D630039A03Rik | NM_178727 | TGGCTGTCTGGAAAGGTCAGCCTCAGTGGGTGGAGGAGGGTCACAGGCTTGAAGAGGAAGCC                                                   |
| Lin28         | NM_145833 | ACTGCTCTGGTCTCTGACACCTCTGGGGTGTCCCTTCCAGAACCTTGAGATTTGACACCCCT                                                   |
| Hes5          | NM_010419 | CCCCACCCCGAGTGCTTCTGCCGGGCAAAGCCCGCCAGCCAGAGGCAGCCTTTACCCCTCCCCTT                                                |
| Orc3l         | NM_015824 | GAGGCATGGCGTGTGGCTTTCGTAGGTGCATCGCTGTCAGGTACAGTCCAGAGCGGCGAGCCAGCGGGAGCCAGGGCC                                   |
| Rarsl         | NM_181406 | GAGGCATGGCGTGTGGCTTTCGTAGGTGCATCGCTGTCAGGTACAGTCCAGAGCGGCGAGCCAGCGGGAGCCAGGGCC                                   |
| Nipsnap3a     | NM_025623 | GGGGTTCGTGGTGCGCGTGATGACGACGCTGCGAGGTGGGCGGGTCTGCAGTGCGGAGAACGGGCCGTATTCTGGGAACTGGGCGGAGC                        |
| Cpne3         | NM_027769 | TATCGCCGCAGAAGTCGAGTGAGGGTGGAGAGCCAGCGAGGAGCACCGCAAGGCGGCAGGACCGCAGGGGCTTTAC                                     |
| Dnajc6        | NM_198412 | GAGTTACAACCCAGTCCACCAGGTCGATCAACCCAGGCGTCTTTCACCTCCAACAAAGACCAGCT                                                |
| Prdx1         | NM_011034 | AGTGCTGGAGCTCTACTCGCATCTTTCACGTGGCGCTTAGTTCCCGACCTGTTGGAACCTGAGGCTAAC                                            |



|               |              |                                                                                                                                                                                                                |
|---------------|--------------|----------------------------------------------------------------------------------------------------------------------------------------------------------------------------------------------------------------|
| Psmb2         | NM_011970    | GCTGTCTCACTGGTGAGGTCGTGTACCCGGGAAGTGTCCCTGTCCGTGGCCTCTGCAGCCTCCCGCTTCCCGGCACCATGGAGTAC                                                                                                                         |
| C79267        | NM_183148    | CCCAGTGGTCAGCCGAGATTTCTCATCTGTACGTGGTCCTAGCGCTGGCTCCTCTGGAATGCTGAGAGGCCACATCTGGCTGTGACGAGGCTG                                                                                                                  |
| Aco1          | NM_007386    | GGAGGGCGCACCCGGACTAGACTGCAAGCTTCAGCCATCGCTTGCAGCTTCTAGAGGGAGGA                                                                                                                                                 |
| Tal1          | NM_011527    | TTCCTGAAACTCGCTTTGGGCGCGCAGACCCGCGCAGGACCTCACGGCAAGCTAAGTAACTGCTGGTCTCTCAGCG                                                                                                                                   |
| Hnrpr         | NM_028871    | CTCTCTCTTATTGGCCCCGTAAGCTGCCCCGCATACGGTCTCGTGGGCCGATTGGTCGGCCGCACGGAGTCCCTGGAAG                                                                                                                                |
| Ankrd6        | NM_001012450 | GCAGAGATGTCCTAAGCAGTGGGTGAGGGGCTTTCCTGCAGGGCTGGTGTCCGGGCGTGAATAGCATTGGTAACCC                                                                                                                                   |
| Ankrd6        | NM_080471    | GCAGAGATGTCCTAAGCAGTGGGTGAGGGGCTTTCCTGCAGGGCTGGTGTCCGGGCGTGAATAGCATTGGTAACCC                                                                                                                                   |
| 2610528J11Rik | NM_025572    | GTGAGTCTCCCTGCTGAGGACGCTGCAAATCCTGGCTGGTGCCCCGCCTTCCCTTCACCTGCACCTCCGCCCCGCCACCT                                                                                                                               |
| Smap11        | NM_133716    | CAGACAGATCCCTGGAAGCAAGGTTCTGGTTGTGCTACGCCATTAGTCAACAATGGGCACAGGCAGGAAAACAAAGCAATGCTGAGTTACTTGGTTTCTCTGC<br>TTGTTTTTCTGCTGCCAGAGGCATTTCTTCTGTGCTGACA                                                            |
| Tcea3         | NM_011542    | GCTATAGCCAAGGACTTTTCAGCTCCTCCCCGGCCACCTCCTCACCTCCCCACCCCTGCTGACATGTCAGTGATCCCCAAGCTTTGT                                                                                                                        |
| Agtrap        | NM_009642    | TAACAGGAAGTCTCCCTGCTGAGCCTTCAGACATGCTGAGAGCTCTCAGGAGGGGGAGCTGCCAGCCTGGGCTGGTGGGTGTGACT                                                                                                                         |
| Epha7         | NM_010141    | CAGTAGCTAAAAGCCAAGTGTCTCCGACTGCACGCCGCTGGCCTAACGCGGCTCGTCCCCGCTTTCCCGGCAACCGATCTGGGAGGGAATCCTGGAC                                                                                                              |
| Topors        | NM_134097    | AGAACCCATTCTAAATTGAGCGTTCACGCCCTGCCCTCGGCTCCGCTCTTCTGGAGGACACGCTTTTCCGCTCTGACGTC                                                                                                                               |
| LOC622404     | NM_001037913 | AACAGTGACTTGCAGGGGAAGTCTACGCGCGTGTGCACGCGGCACTCTCTGCCCCTGGTCCGGGGACTTTCCTTAGGCGAAAGGATAAGGAACATGTC<br>TTGGCTGGTTTAAACAAGACATCATTTAATGATGTC AAGCCCAGACTCCTGCGACCCAGATTCTTAGCCCTTTCCTTAACCCGCTGGAGTTTCTGGTGGCTTT |
| Akap2         | NM_001035532 | GATTTTA                                                                                                                                                                                                        |
| Akap2         | NM_001035533 | TTGGCTGGTTTAAACAAGACATCATTTAATGATGTC AAGCCCAGACTCCTGCGACCCAGATTCTTAGCCCTTTCCTTAACCCGCTGGAGTTTCTGGTGGCTTT<br>GATTTTA                                                                                            |
| Akap2         | NM_009649    | TTGGCTGGTTTAAACAAGACATCATTTAATGATGTC AAGCCCAGACTCCTGCGACCCAGATTCTTAGCCCTTTCCTTAACCCGCTGGAGTTTCTGGTGGCTTT<br>GATTTTA                                                                                            |

|               |           |                                                                                                                                                              |
|---------------|-----------|--------------------------------------------------------------------------------------------------------------------------------------------------------------|
| St3gal3       | NM_009176 | CACAGCATCCCAGTGTCTGGCCCGTCAGCTGAGGACGGACAGCTGCTGCCAAGCACCCACAATAGGCTTGTCTTTTCCCGGCAGAATGCATCGAGGGTGGAGTG<br>AGAAGGTGAAAGGTCTGGACACGTCATTCCCTTTTCTGTGTACAGCTT |
| Zmpste24      | NM_172700 | CACCTGAAATATCCCTCCGGATTCTGTGTGCAGGGATCCAATTCAAAGGTTCCGGCCTTCTTCTGGGAACGTCAAGTGTGGTTCGCCCTCTCCTTTGCTTTGGC<br>GGGTTACCAGAGAGGGCAATGGACCCCGGTGCTTAA             |
| Gjb3          | NM_008126 | AGGAGGCATCTCTGTCCAATATCCCTTAGGGTCTGTTCTCAAATTACTTCGAGTCTGAACCCGCC                                                                                            |
| Phactr4       | NM_175306 | ATCCTACCTGGTCTCTGGCCGCTGGCTCCAGCCAGAGCCTTCGGCCCCAGGGGAGGGGG                                                                                                  |
| Necap2        | NM_025383 | CACTCTCTCCATCTCTATCGCCCGAGCCCTCGGGACTTCCGGCTTCTCCCCGCCCTTCAGGACCGAAAGTGATGCGACTCTATGACCAAGTTCTGTCTAGAGC<br>GGAAGCT                                           |
| Tmem142a      | NM_175423 | CCACAGGAGCAGCTGCAAAGAGAAGCGAGGCCTGACAGCGTGGGGCGCTTCCAGGAAGGCGAGC                                                                                             |
| Wsb2          | NM_021539 | CTCTCTCCCCTTAGTTCCTCCCCCTTGGCTTTCCAGCATCCCTCCCGCTGGGGCCGTTG                                                                                                  |
| Noc4l         | NM_153570 | TCCCGTTCTTGAAACCGAAGTGTGCGCCGAGCGGAGTCGCGCCCGTGACGTCACCCGAGCC                                                                                                |
| Ddx51         | NM_027156 | TCCCGTTCTTGAAACCGAAGTGTGCGCCGAGCGGAGTCGCGCCCGTGACGTCACCCGAGCC                                                                                                |
| Ephb4         | NM_010144 | GGCTACTGCCCCAACATGCACAATCAGGGGTAGTAGGCATGGGACACCCAGCACCCCTGGACAGTCCCTAAGT                                                                                    |
| Fastk         | NM_023229 | AGGCGCTGCGAGCAGAGGAGCCGCGAGCCCCGCCCTCCGCTTCCGGGAAATGCGCACGTCGCGGGGGCGGGG                                                                                     |
| Crot          | NM_023733 | CCTAGGCTGCAGACCCCGGAACGCAGCAGAAAGTCAGATAAGCGCCCTGCAGTCCCCGCTACA                                                                                              |
| Tnip2         | NM_139064 | CGTCTGTCTACCAGACCTTGGGTCCCCAGACGACATGGCTGTAGGCCTTCCGTGGGGACTTGGGCGTCTCCAATTCTCCACACAGGGGGAGCGAAAACCAG<br>CCTT                                                |
| Msx1          | NM_010835 | CAGCCTCTCTTGGGCCCTTTCAAAAACCAAACCTGCACTGAAGTACTAATGGTGCCGCTGCCA                                                                                              |
| Apbb2         | NM_009686 | GGAAACGCTTCTTGCTGCTCCCGCCTCTGCGTCCCAGCCCGGTGCGCTGCTTCTTAGGCTCATTCCCTTGGCGGCCTGC                                                                              |
| D430033A06Rik | NM_177007 | TTTTTTTTTTTTTTTTTTTTTTTTTCCCGAAGAGACGAAGGAATGCTCAGTGCATGCGCGGTCGTTTCGCGGCCTT                                                                                 |
| Cd38          | NM_007646 | CGGCGGGGGGAATCTCCAGATTGTCCCAAACAAGAATCTTGTGTTGTGGATCAGCTGGAAGC                                                                                               |
| Gtpbp6        | NM_145147 | CCTTCTTTCTCGTACTCCGCCCTTCCAGAAGTGGCGTACCGCCGCCCAATCCCCGTGGCCTTCTGTATAGCACTAGTAAGT                                                                            |
| Cit           | NM_007708 | AGAGAAAACCATACCTGATGCAAACCTGCAAGAGGTTTTATTGTTAGCTAGCTGAGGATGAACTCC                                                                                           |

|               |              |                                                                                                                                  |
|---------------|--------------|----------------------------------------------------------------------------------------------------------------------------------|
| Serpine1      | NM_008871    | TTCCCTTGACTGGAACATCCCTGTGCCTTTGGCTGGTCGGTCGTCTAGACCCCTTGGAAAGTACCACAAGA                                                          |
| Brca2         | NM_009765    | GATGGGCGAGCACATGCTAGCCGGGAACAGGCACAGAAGGAGCTGCTCGCTGACTTCCCGGTGGCACT                                                             |
| BC057022      | NM_001004180 | GGGAAGCAGCTGGCAGCCGATCCGGTTTCCAGGTAATCCCCGCCCCACCCACACTCCGGGAGC                                                                  |
| Ubc           | NM_019639    | CACCCAGATCCGTCCTTTGCAGGTGACCAGGGACTACCGCTTCCGAGCCGGCACCAATGGGGACCGAGAAAGGGCCCCAGCAACAGAGAGGGATTGGCTGAG<br>GCCGCCTACG             |
| Dhrs8         | NM_053262    | GAGCCACACCTTAAAGGACCAGGAAACAAGGAAGGGGACTCTTTGGGGAAAGGAAGAGAAGTAGCAAGAGGGGGATGGGAGG                                               |
| Golga3        | NM_008146    | CAATAATAACAACAAGACTGACAAACACTTAGGAACAAGTTGTGCAAGTGTGGTGGAGGCGGT                                                                  |
| Coro1c        | NM_011779    | CACCACCTGCATGCAGTGCCCTCATAGGTCAGACCAGACTGAGCTAGCCTGAATCTGGAGTGTCCGCAGGCT                                                         |
| Fbxw8         | NM_172721    | GGGACGGACTGTCCATCCGCCGGAAGTGTCCGTAGTCGGCCTGGAGACTTCCGGGAGCGCGTCTTGTAGGTTCCGG                                                     |
| Anapc7        | NM_019805    | GGCGATCAGAGATCCAGCTCATCCCTGTAACATCTTTTCTTCGCACTTGGATCTAGCGGGTCACTTGGACGGGCAAGCCATGCCT                                            |
| Rabl5         | NM_026073    | TGCAGTTAGCAGGACCAGCTTTGCCTTTTCTCTTTTGGTCTCTCAGCTTCCATCGTAGGCCACTTTTCCAGGCTCCCGGAACTGTCAGGGTT                                     |
| Mospd3        | NM_030037    | TTCCGGGTCTTCCCGCTCCGATCTCCTGACGGACTCTGCTCTTTGAGAGTCCCTGACCTCCAGGTCACCGAATTGTGTCCCTGTGCCCTTTCCTTGAGCTCGGCAT<br>ATGCTCTGCTCGGGATCC |
| A930017N06Rik | NM_175522    | AGGGATGACTTGGATCCCCGGAAAGCACACATTAAC TCCCCCCCCCACACACACAGAGGCTAGT                                                                |
| Cyp51         | NM_020010    | GTAGGATGTAGTCTCCGGAATAGCTTGGCCGATTCCCAGCAGGTAGCAGCAGGGACAGTGGCTGAACAATAGAGTG                                                     |
| Serpine1      | NM_008871    | CATCTTGCCCTTCCTCTTTGTGTGTCTCTAGTTCTCCCCCTGAGACGTCTTGCTCACTGCCCT                                                                  |
| 4933411G11Rik | NM_177880    | CCCCAAGAATTGCACAGAACTCTGTGTCCAGACGCCTTCGCGGCCACTGCATCTAGGGATCCTCGCGCAAGA AACTTACCTCCTCCAGCAGTTTGGG                               |
| Rbak          | NM_001045482 | CCCCAAGAATTGCACAGAACTCTGTGTCCAGACGCCTTCGCGGCCACTGCATCTAGGGATCCTCGCGCAAGA AACTTACCTCCTCCAGCAGTTTGGG                               |
| Rbak          | NM_021326    | CCCCAAGAATTGCACAGAACTCTGTGTCCAGACGCCTTCGCGGCCACTGCATCTAGGGATCCTCGCGCAAGA AACTTACCTCCTCCAGCAGTTTGGG                               |
| Fbxl13        | NM_177076    | CCAGGAAAAAGCTGCTTGCACTAGGGGCATCCCGCTGCCTGGTGAAAGGAACCGCAGCACACAGGGTGGGAGGGCTTCCGATTTAG                                           |
| 2810037C14Rik | NM_026034    | CCAGGAAAAAGCTGCTTGCACTAGGGGCATCCCGCTGCCTGGTGAAAGGAACCGCAGCACACAGGGTGGGAGGGCTTCCGATTTAG                                           |

|               |              |                                                                                                                             |
|---------------|--------------|-----------------------------------------------------------------------------------------------------------------------------|
| 0610009O03Rik | NM_026660    | AGGGAACCTCCCTGGATAGCAGCCACACCCCGGAGGCTTCGGAACAGGCACCTCCTCTTCCGGGAGGCCGTGCTGTGGCGGGAAC TGGGTTTGGAGTCTCCCA                    |
| D5Ert585e     | NM_027922    | TGAGAGGGTAATTACAGGAATGTGGGTGCAGGTGGAAAGCCTCCACACTGCAGCACAGACAGAGCACTCCTTCCCTTGTTCCTCTCTATACTCTA                             |
| Rfc5          | NM_028128    | CGGTCTCTCATGATTCCCTGGGTGTGCACCGAATTGGGAATTGAGTGGGGGTTTCCCCACTAGGTTCTTTCA                                                    |
| Ppp1cc        | NM_013636    | CAGAGCCGGAAGGAGCTGGTGAGCCTCGCAGCGCGCAGCAGACTGACAAAGTCCACCTTCAACTTGC GCGCGCCAA                                               |
| P2rx4         | NM_011026    | CTCGCCGGGCTCTAGCCAAGCCACCTGGAACCAGCTTGAACAGGACACTGGGGACTACTGGACGTCTGGGAGCTAAG                                               |
| 4930438O03Rik | NM_029112    | GCACACTGTGGGAGGAGAGAGCTGACTCCTGCGTGTGTGTCTGACCTCCACATAGCGAGCAC                                                              |
| Cldn4         | NM_009903    | TTAAAGCTCCTAGAGGAGGGGCGGAGGCAGAGGGAGGGTTTCAGTCCCGGAGGCCTCCCTCGGGA                                                           |
| Ars2          | NM_031405    | AAAGAATGACGGGAAGAGGGTGGAGACGCGGAAGTCTCGCGTGGTTTTGCGACAAAATCGCCCCAGCTTCTCGGAGCTACGGAAGTTGAGCTGGGCCAAGCC<br>AGGCCTTCTGAACGTGC |
| Bcdin3        | NM_144913    | GGGGGGGGGCGCGGAATAAGATGTCAGCGAGGATTATGGAAC TTGTAGTTTCACTAGGCTTT                                                             |
| Zewpw1        | NM_001005426 | GGGGGGGGGCGCGGAATAAGATGTCAGCGAGGATTATGGAAC TTGTAGTTTCACTAGGCTTT                                                             |
| Gpr146        | NM_030258    | CCAGCATTAAAGCGGCCGCGCTGGCTGGCCAAGGGGATTGTCCGTTCCGACTGGGGGCGGAGCCTGCGGGA ACTAAGCACCGGTTCCAAGAAA                              |
| Usp1          | NM_001013378 | TCGCCGAGTTCCCACTGCGCCTGCGCCTGCTGGGCGGGCAAGCCACGCCTCTGCGGAGCCCTGCCGGAAGTGTCTGGTCTT                                           |
| Skap2         | NM_018773    | ACCACGCCACACACAGCCGGGAAGGCCACGCCATACGCGGAAGCGAGCAGGAGGCGAGGC                                                                |
| C1rl          | NM_181344    | CTATTCCTGAGTCTGTACAGAGGTGGCAGACCTGCACCCAGAGTCTCAACTCATTTCCAGTAA                                                             |
| C87436        | NM_146170    | TGCGCAGGATGCCGGGAAGCGGGTGCATGGGAAGTGC GTTTTCCAGCCGGCCGTTCCCGGAAGC                                                           |
| Trh           | NM_009426    | GGGGACCCGCCGCTTCCGGAAACCTGGTGGGGGCCGAGCGAGCGAGGAGGCGCGGCTGG                                                                 |
| Ube1c         | NM_011666    | TAGCACTCACCTCAAGGTCTCAGAGTTGAGTATTTCTGCACTGTAGGCCCTTAGAAGACAGAGCAAGGCAAGCATT T                                              |
| Arl6ip5       | NM_022992    | TAGCACTCACCTCAAGGTCTCAGAGTTGAGTATTTCTGCACTGTAGGCCCTTAGAAGACAGAGCAAGGCAAGCATT T                                              |
| Tmem40        | NM_144805    | CCTCAGCCTGCCTCAGCCTGCCTCAGCCTGTTTCAGCCTGCCTCTGCCTGCCTCAGCCTGCC                                                              |
| Nanog         | NM_028016    | AGCCAGTTCTCTGGACTCCTCCCAGCTCTTACAATTCCTCTCCCGGACGGTTCTTAGAAGACAAAGGCAAGC                                                    |
| Grcc10        | NM_013535    | CTAGGAAAACCAGAGAAGGATCAAAGCCCCTCTCACACACCGGGGAGCGGGGAAGAGA ACTGTTTTGCT                                                      |

|               |              |                                                                                                                          |
|---------------|--------------|--------------------------------------------------------------------------------------------------------------------------|
| Ldhb          | NM_008492    | AGAGATGGTGAGGCTTGGCCAAGGTCAGAACTTCCCATGCAGCTGCGAGGCTTTTCTCTGTGATGCA                                                      |
| Gm1070        | NM_001033462 | GAGCCGCAGAGCGGGGAGCAGCTGGGAACCTGGGATTGTTCTGGAGCTCGCCGGAACCTACCGGAACCTCGCCGCCCTGTG                                        |
| A2m           | NM_175628    | TAATCCTTCTGGGAATTCGGCTAACGGGTCAGGAATTAACCTTGGCAGTAACTAGGCCATCAATGACCCCTTC                                                |
| Pdk4          | NM_013743    | CGGGATGACGTGGGCCCCCTTGGGATAGATCCCAGGTCGCTAGGACTTCAGGCCCGCCAGACT                                                          |
| Cbx3          | NM_007624    | CCTGTTCCAGTAAAGCTCGTGGAGCGCCGCCACCCCGCCCCACCCCGCGCCTCGGTGGCTTCAGAAAGCAA                                                  |
| 8430410A17Rik | NM_173737    | GGCTTCTGACCCTTAGGGGTTTGTGGGAATAGCTAGAGAGTCTCAATTCGGATGGCCTTACACATTGAGGGTGGGCAGCACAGGTTTTCTGGCTTCAGATTCCG<br>GCCTGGGAAGGG |
| Krcc1         | NM_145568    | CCTCCAATGGCAAGAAGGACCGACACCCAAGCTCCTACCCACACGGACAGAGCCGGTTAGTCCGAAATGGCGGGAAG                                            |
| Prmt8         | NM_201371    | TTTCTCTTTTCGGGCCATCTGTCAGGCATTGAGGGATAGAACAATGGGGGAGGGAGGCCATACTCAGGAC                                                   |
| Tulp3         | NM_011657    | GGTAAACTCCAGGGGAGCGGCTCAAGAGTGCTGGCGGCACGGGATGCACAGCGCATTGCAAATG                                                         |
| Ergic2        | NM_026168    | CGCGATACTTTCCGCGTTGACGGTATGTGATCTAATCAAGCGGCGCGGTCAACCTGAAAGGGGCGTGGCTACGTGGAAACTAAGTGAA                                 |
| Ergic2        | NM_026355    | CGCGATACTTTCCGCGTTGACGGTATGTGATCTAATCAAGCGGCGCGGTCAACCTGAAAGGGGCGTGGCTACGTGGAAACTAAGTGAA                                 |
| Ezh2          | NM_007971    | CTTGCTGGGTGGAAGCACACAGTCGCTGTCTTTGTTCTTTTGCCAACGTGCGGTACCTCTCAGGAAAGCCATGGACAGGCAGGCGGAGG                                |
| Adipor2       | NM_197985    | GGACGAGGGCGTGCTGAAAACACTGGGCTAAAAGACGCCCTAGCCGTCCTAGGCCGTTTAC                                                            |
| Ncapd2        | NM_146171    | GGGGCGTGGCCCCGAGTCTGCGCTTTCCCGGCATCTCTACCGTAGTCGGCTAAGCATGGTCACCCGTTGTCTCTCCGCGGGCCGCTAAAGCAGTC                          |
| Mrpl51        | NM_025595    | GGGGCGTGGCCCCGAGTCTGCGCTTTCCCGGCATCTCTACCGTAGTCGGCTAAGCATGGTCACCCGTTGTCTCTCCGCGGGCCGCTAAAGCAGTC                          |
| Asns          | NM_012055    | GCGTGCGGGAAGTTTCATCATGTGGCTGGGACCCAACCCGTGCGCAGGGGCGTGGCCCGCAGTG                                                         |
| Hirip5        | NM_020045    | GAGAGCTGATGATTGGGCAGATAAAAGGGAAGGTGGAATGGAAGTGGAGAAAGAAGAAGGAGAAAATGGATGAAGGAGAGGACGCGGAGGAGG                            |
| Clec12a       | NM_177686    | GCACGCCAAATTGGGAATTGAGTGGGGGTTCTCTACTAGGTTCTTTCACAGCAAGGACGGTCTCTCATGAGTTCTTGGGGGTCTCGTCATCTGAGACTTGA<br>ATGA            |
| Etv6          | NM_007961    | TGCTGCGCCCGGGTCGCCCGCGCCGACCCGCACACCCACGCCGTGCTCGCCGGTCTCTACGCCCC                                                        |

|               |              |                                                                                                                 |
|---------------|--------------|-----------------------------------------------------------------------------------------------------------------|
| Cmas          | NM_009908    | GGTTCTCCCAGACGCTTTCAGTACTTGTTAGGACTCCTCCTGACTGGCATACTCCACCCCCTACCCTA                                            |
| Kras          | NM_021284    | CGCGAGGGTGGTGCCGAGAGGGCGTCGGCCAACGCGGACCCCGACCCGGGGCTGGCGCTCCCAGATAGCCCCGCCTCGCCGCTCGT                          |
| ZBTB45        | NM_001024699 | CATTGGCTTTCCATTCTGCAAGCTCCAGCTAGGAAGGTTTCCCCACTTACTGGAATGTG                                                     |
| Sema4b        | NM_013659    | AGCTCAGCCACTGACAAGCCCAGAAGCTGGTTGTTTTCAGGAACCGCCCAGAAAGCTGCTGTCCTTTTCTGGAAGATAGCA                               |
| Trim6         | NM_001013616 | TACCTGCCCCGACCCGGTCTACACCGGCTGCAACCAGTCGGAGCTAGGAGCCCTAGGGCCTCTCCAGAG                                           |
| Bbc3          | NM_133234    | CCCTAGGTCTGGGCTGTCCCCACGCTGCTCCTCCTGCCTGGACCAGGCCTCGCCCCGCCCTC                                                  |
| Aldh16a1      | NM_145954    | AGGCTTCCGCACTGTAGGGGAAATCACGCGCTCAGAGGGGCGGGGCTTCCGAGAAGGCCGAGTGGATGACGGGAGCCCCG                                |
| Nop17         | NM_029406    | AGGCTTCCGCACTGTAGGGGAAATCACGCGCTCAGAGGGGCGGGGCTTCCGAGAAGGCCGAGTGGATGACGGGAGCCCCG                                |
| AI428936      | NM_153577    | CCAGGTTCCTCCAGGAAGGGGTGGAGCTAGGCTGGCCCCGGGGCCCTCAGTAGCCTCGGAC                                                   |
| Fah           | NM_010176    | CCACCCCCCCCATCTCCATCCCGAACTGTCAGACCGTTCCGCCCTATGTCTAAACCTCCCC                                                   |
| Nup98         | NM_022979    | AAGAGGAGGAGCGTAAGGAATTGCCGGGAAAGGGGGGGGGGGGAAAGGAGGGACGATGGGGAGGGATGTAGAGTCCCCTCCCTCTGCCGCAACGGT<br>TGGCTGAGAGA |
| Arl6ip1       | NM_019419    | CGCCCCGAGTCTGCTTATATAGGCTAGCTGCCTTTCCCGACAGCCCTCGCGAAACTCGCTCCTCATTGGG                                          |
| Hsd3b7        | NM_001040684 | GGGGTGGAGGCTAGGCTGGTCTCCTTCTGGAATGGGTCAGGAGGGAGGAGCGAGCGGAAGGAAGGA                                              |
| Hsd3b7        | NM_133943    | GGGGTGGAGGCTAGGCTGGTCTCCTTCTGGAATGGGTCAGGAGGGAGGAGCGAGCGGAAGGAAGGA                                              |
| Cic           | NM_027882    | GGCAGCAGCCAATAGGCTTAAGCGCAGGGGGCAGTGCTTGCGCGGAAGGCCGCGGGGAAGCGGGGAAGG                                           |
| Zfp36         | NM_011756    | GAGGGGGGGTCTCCTGGAAGCCGTGACGAGGACGCTCAGCCCCGACGCTTGGGTTCTTCTC                                                   |
| Fchsd2        | NM_199012    | CCCCAGCGGGCTGGCGGGAAGGCGCGGGGAAGCCCCAGCTGCCTGCTCGGTGTGGGGGAGGGAGGACG                                            |
| Sbk1          | NM_145587    | ACCCGGGTGGCTTTGCACAGCTGCTGCTTTCAGCCAGGAACCCCCACCCCTTCTTCCGTTCTGCTATACACCTTA                                     |
| Leng1         | NM_027203    | CCCAGGACTACAGCCTCCAACACCTGTCAGCTCAGACCCTAGGCTACTCCTCAGACTCACCTTCTTCAGGCAGAACAGT                                 |
| 6330581L23Rik | NM_146185    | CTCCCAGGAGAGGGAAATACAACGCCTGGAATGTCAGGGGCTGAAAGCTGTGGCCTGAACAACAGATACAA                                         |

|               |              |                                                                                                                                              |
|---------------|--------------|----------------------------------------------------------------------------------------------------------------------------------------------|
| Ppme1         | NM_028292    | AGCAAAGCATCATGGGTGTTGTAGTCCATTTGCAGGGGCTCTAATTGGCGCCTTCTTTTGGCACCGCTTCCGGGAACTGTTG                                                           |
| AU020772      | NM_001017985 | AGCAAAGCATCATGGGTGTTGTAGTCCATTTGCAGGGGCTCTAATTGGCGCCTTCTTTTGGCACCGCTTCCGGGAACTGTTG                                                           |
| Relb          | NM_009046    | TCGGCCGGGAAGCGAAGGCTTGGCACTTCGCAGGGTCCGGGTGCGAGTCGCTGCCATTGCCT                                                                               |
| Ccne1         | NM_007633    | GGTTTCTGCACAGGCCTGGGGCCCAAGCGGAGCCAATGACATTCCCTCAGGAGTTGCTAGGCTGACTGGAAGTGGGCTT                                                              |
| 2310044H10Rik | NM_197991    | CCCATTTTTGTATTTTTGAGACAATCTCAAGCAATCCAAGCTAGCCTCAAACCTCTTGATCCTCCAGCCTCAGCCTCCCAAGCACGGAGATGAGAGGCTAGCTAC<br>CACTACTCCACGCAGCTCAGGTTCCGAGCAA |
| Btbd1         | NM_146193    | GCACCCGGCGCGCCGCCATGGTCGAGCCGCCCGAGGCCGCACCGCCCCCTGCCT                                                                                       |
| Mesdc1        | NM_030705    | GCCACACCCACTCCCTTTCTTTGTGTCAGACCTTGTCTGCCAGAACTCCTGGAACACCTGGGCCTCCTCCAGTAA                                                                  |
| Nupr1         | NM_019738    | CTACTTATAACGCTGTCTCCTCCCTAAACCACGGGGTTGGCCCCGCCCTCCAAGCCCTGTCTGATGCAATCTGGCCCTTTCCCA                                                         |
| Zfp629        | NM_177226    | CTTAACCCCTTAAGTGCCCTGCCTCGGGGACGGGCTAGATGCCGGAACTCTAGGGTCCTTCTCAAGGGGTGATTCCAGGCTGAGGACCCGGGACCAGTTCA<br>GGGTGACTGGGACGGAGCAGGAAGT           |
| B4galnt4      | NM_177897    | CCAGGAAGCAGTCAGTGTTCCTTCCATGGTCTCTGTTTTCAGTTCCTGCTTCTAGATGCCTGCTTGAGTGCACGCCCTGGCTTT                                                         |
| Nipa2         | NM_023647    | TCGGACAGCCTTCGGCCGCACCGCGCCAGCACCAGAAGAGCCGCCGAGAACCTGCCGGGAAACCTG                                                                           |
| A230056P14Rik | NM_001033396 | TCGGACAGCCTTCGGCCGCACCGCGCCAGCACCAGAAGAGCCGCCGAGAACCTGCCGGGAAACCTG                                                                           |
| Pwwp2         | NM_001033206 | AGAAGCAGAGTGGGGGAAGGGCCTGGACCCGGGGAGTGTCCCGCTACCCCTCGGTTCTGGCAAGGCCTCCTAGGGGGCATTCCAAGCCTGCGTGGCGT                                           |
| Chmp2a        | NM_026885    | CCTGCTGCGGCCGCCGTTTCCGGATTAAGCGACCTGACGTCACACGACCCACCCTCTCCGGGAATGCTGGG                                                                      |
| Npas1         | NM_008718    | GTGCCTGTCTTCGCCCGCCTACAGCGGCCCTGCCTGCTGGATAGTTCCCATTCGGGAACTATCTGGGATAGTGTGGCCTGGTGTGTCTGA                                                   |
| Bcl3          | NM_033601    | TGGAAGGCCCTGTGCCTGGGGACCCAGCAGGGATGGAGGGGAGGGGAAGGGAGGCAGGCCTGGAAT                                                                           |
| Erf           | NM_010155    | GGAGGATGATCAAGAGCACAGCCATTTCCAGCCTGAGTTTACCCAACCCCTCAACCCGAGCCTGAAAGAGGGCAGCTGTCCAGGGGTGGGGTGAATGGG<br>TGGGAAACATTTCCCA                      |
| Zfp36         | NM_011756    | GCAAGCACTTCCGGCCTAGGGGGAGGTGAACTCTGAGCTGAGTTTCCAGAAAAACAAGCAGGGACGGGAAACCGGGGGTGTGAGAGCCAGTG                                                 |
| Herc2         | NM_010418    | TCGAGAACCTCGTCCCCTGCAAATACCTTACCAACTTCGGGTCCCTGGAAGCAAACACA                                                                                  |

|               |              |                                                                                                                                                                                                               |
|---------------|--------------|---------------------------------------------------------------------------------------------------------------------------------------------------------------------------------------------------------------|
| Zfp446        | NM_175558    | GCAGTGGGACGTGCTCGGTGTCACTTCTCTGGAAGTGCCCAACCTCTGGGGCTCTCCACGCGTCAGAGGTGAGCTCACTCC                                                                                                                             |
| Mark4         | NM_172279    | ACCTCAGGGAGGGCTGAGACTGCAGGTGTGAGCACCACCCAGTTGTCTCTGGTTCTGGGAATTGTTTGT                                                                                                                                         |
| ApoE          | NM_009696    | GAGACAAAGTCTCTGCCAGCTCTCGGGGCCAGACTGCACAGAGGCGAGTGACCTGGAGCCACCCTCTGGTGAGGCCAGGCCTCTGATGTTCC                                                                                                                  |
| Bcl3          | NM_033601    | CTCGGGGCTTTCCCGGACATCCCGGGAGGTGGAGCACACACTGGGGTTGAGTCCAGGTCACTGAGTCACAGGGAGGCGGAGGGGGCGGGCGGCTTTGTAG<br>ACTTAGAGAGGCAGGGGAATAGCACCGCATGGC                                                                     |
| Samd4b        | NM_175021    | GCGCTGGGGTGAAGTACTGAAAGGGGCCGGCTCTCCAGAAGGGTGACAGCAACGTGGCTTG                                                                                                                                                 |
| Gmfg          | NM_022024    | GCGCTGGGGTGAAGTACTGAAAGGGGCCGGCTCTCCAGAAGGGTGACAGCAACGTGGCTTG                                                                                                                                                 |
| Gmfg          | NM_001039192 | GCGCTGGGGTGAAGTACTGAAAGGGGCCGGCTCTCCAGAAGGGTGACAGCAACGTGGCTTG                                                                                                                                                 |
| Nfkbib        | NM_010908    | AATCCCCAACACGCCCCCTCATATACCAATCAAATGTTTTAAATAGCTACACCCCGCCCCTGTACTGCACCACA                                                                                                                                    |
| Sirt2         | NM_022432    | AATCCCCAACACGCCCCCTCATATACCAATCAAATGTTTTAAATAGCTACACCCCGCCCCTGTACTGCACCACA                                                                                                                                    |
| Capns1        | NM_009795    | CTTCACGCACAATAAACTAGACTGCAAGGCTGACTTCGTCTCTTTAGCTTGCCAGAGTCTCTGCCCTTTACTCCCCCTAC                                                                                                                              |
| Chchd8        | NM_183270    | CTGAAGGCGGGCTCTACACGGAGAGTTCACCAATGGGAATTGCAGAGGGCTCTGTTCTTCCGCGTGTGTGCTCCCGCTGGGTC                                                                                                                           |
| Art1          | NM_009710    | GAGTCTGCCTGGTTCTGTGCTTCTCTGGCACTGCTATCCGTATGCAGGCAATGTGCAGCCAGTGTCTGATCCTTGCCCTGGTCCCCAACCTCTTAG<br>CTTCCTGCCCCGCGCTTTCCCGGCAGAACTCACCTGGAGCGAGATGCCTGACTTATCCTCGAGATGAACAGTGCCTTTGATGGTGGGGATGATGAAACATCCGGC |
| Cyb5r2        | NM_177216    | AGTG                                                                                                                                                                                                          |
| Citn          | NM_007803    | CCCGCTCACCGCACCAGCAGGGTCCACCAGGCTCCCGCCGCCCCGCGCTCCCTGTGCCC                                                                                                                                                   |
| Cend1         | NM_007631    | CTCAGTGTGTTACTAGGCGGACCGGCAGATCTCCACGAGGAAGTTCGTTGAGCTCTGCGCTC                                                                                                                                                |
| Nol3          | NM_030152    | GAGTTCGCAGAGCCAGTGAAGCATGCCCTTCCCCACGCCATTCCCAGCAGCCCTGGCCGC                                                                                                                                                  |
| Rbm35b        | NM_176838    | CCTCCCATTCCGGAGCGCGCCTGCGTCAGTCCAGGCTTTCCGGTAAGGACACTCCCTTCCAAC                                                                                                                                               |
| Lsm4          | NM_015816    | AAGCTGCGTTTCCGGGAAATGGGCGGGCTTAATGGCTCACGTGGGCTTCGTTGCCCTCTTG                                                                                                                                                 |
| Hook2         | NM_133255    | CTCCCCAAACCGGCTCAACCGGTGGACGCACCCTTTTCCAGAAGGATGCGTTCCTACGTTCTGCGCGCCC                                                                                                                                        |
| 1700041G16Rik | NM_175196    | GCCACAAAGAAGATCTTGTGCCGGTAAACACTCAGGAGGTAGTGGTGAGGGGTGGGGATGACCG                                                                                                                                              |



|          |              |                                                                                             |
|----------|--------------|---------------------------------------------------------------------------------------------|
| Unc13a   | NM_001029873 | CCGTAAATGACGGCGGCCAGGAAGCTCAGGGGCCGCACAGGAAGGAGCAGGGACTTTCCTGTCCG                           |
| Jak3     | NM_010589    | CCGTAAATGACGGCGGCCAGGAAGCTCAGGGGCCGCACAGGAAGGAGCAGGGACTTTCCTGTCCG                           |
| Card15   | NM_145857    | GTCCCCAAGGGCAGAACACAAAGCACTGCAGGCAGGCCTGTTCCCGGATACCTGTCTCACCAGTCC                          |
| BC057552 | NM_172502    | GGCCGGCCGGTTGGGTGACAGCCGGCATTCTTGTCTGCTTCCCGCTACGCTTGTCATCAAAGCTATCTTGGTTTTGGTTG            |
| Hook2    | NM_133255    | CCTTAGGGAGGGTTGAGTCACTCACTTCCCAGCAGTACAACCTCAGGCTGGGTCCAGCTGTTTCTGGAAAACATGTTTCGAGGTGG      |
| Galns    | NM_016722    | GGAGTGGGCTGGGCCTTACGGGAAAGGGGCGGGACCAAGGCCGGACCTGAGAGTCTGGGCGGA                             |
| Trappc21 | NM_021502    | GGAGTGGGCTGGGCCTTACGGGAAAGGGGCGGGACCAAGGCCGGACCTGAGAGTCTGGGCGGA                             |
| Large    | NM_010687    | CCGGAGCCCGGGCCGGGTCTCGGGAAAAGGGTGCTAGCTGGAGCTCCCCGCCCTTCTTCCCGGACTCCGGCTACCCCAGA            |
| Hook2    | NM_133255    | GAGCTGGGGAAGGCCCGTTCGTTCCGGCCCTGGGGCCCCAGTTTCGGGTCCGGCAGGAAGGG                              |
| Katnb1   | NM_028805    | CGGATTTTTTAAACACAACCGGGTTCCAGGAAATGCAGGAAAAGGGCGGAAAAAACCAAGCCT                             |
| Thap1    | NM_199042    | AGTGTGGAGGGCCAGAAGGATGTTGTCAGTCTGCTCCGCCTACGGCTGCAAGAACCCTACGACAA                           |
| Aars     | NM_146217    | TTGAGCATTGCATCAGCCGAGCCCAGGAGCCTTCCCAGAAACCGGCTTGTTAGCTCATTCCGC                             |
| Trappc5  | NM_025701    | CCAATTCCATTTACAAGAGTGTCTTCTGCTTACCCAGAGAGGCGTCTTAGGCTCCAGTTCA                               |
| Slc25a4  | NM_007450    | CCTCCTTTCAGAGGGCATTGGGGGCGAAGACGCTTCCGGGAGCTAGGGGTGGGTGGGGGCTGTGCCTGCAGCTTGGGACGTTAAAGGG    |
| Kifc3    | NM_010631    | GGGGGATGGGGGAGAACTACTCGGGGGACACAGAGGGAGGGCCCAAACAGTAGCCTTCTGGAAGCGACCCTT                    |
| Tssk6    | NM_032004    | GCCACCAGCGGAAGTGAGGCAACGCGCGACCACCATTTTGTAGTGTGGCGGAAGTCCGTCACCCAGGAGGTTCCCTATAATTTGGAAGCG  |
| Rbmxt    | NM_009033    | TTTAAAAAGACTGGGCAAGCAGGCCAGGTGACACGCCCTTTAATCCCATGCCTGGAGGCAGAGGCAGGTAGATCTCTTAGTTGCAGGCCAG |
| Asf1b    | NM_024184    | CGCTGCTCTCTGTGAGGTGCGTCTACCGGAAAAGCGGAACGAGGGGCGGGGGATGCCGGTGCGGTAACCCTTGGGATTGGACAAGAG     |
| Mt3      | NM_013603    | ACCCTGAGACCTGCCCTGTCTACTGGTGAGCCCTTCCCCCTCTGCAGCACTTTGCCCTTTCC                              |
| Sntb2    | NM_009229    | GCTTTCAGTGAACCAGGACAACCTCGCCTCCCGGAAGCGGCCTCGCCGGCCTTCCCCCGCCCTCCGGAAAGTGGGCGTGGCCCTCATGA   |
| Aprt     | NM_009698    | CGTTCCTTCCCTCGCGCATAGTACAAGGGGCTGAGATTCAGCCCCTGCTTTCCTGGAATTAGCCCAGGAAGGGA                  |
| Dlc1     | NM_015802    | ACCGCACACCAGGCCCGCCCAAAGCTCGCCCAGGTCCCGCCCCACGCCTCCTTCCCCCTTTCCTGG                          |

|               |           |                                                                                                                                       |
|---------------|-----------|---------------------------------------------------------------------------------------------------------------------------------------|
| Ssbp4         | NM_133772 | CGCGCAGCCCTTGCTCGCCTTGCCGTACATGCTCCGCACCTGTCAGGCGCGCGTGGCCATCGCTGCC                                                                   |
| Ssbp4         | NM_133772 | CCAGGGCTCAGCTGGGCGACGCCGGCCTTTCCCATTTCTGCTTGGCCCGCCACCCCTC                                                                            |
| Mtap1s        | NM_173013 | CCAAAGCCTAGCGGGCATTGACAGAGGGGTGGAGAGGAGGGGGCGCTTCCGGCCGGGGTCTCCGGTG                                                                   |
| Elmod2        | NM_178736 | AGGAGGGATACCGGGAACCTCAGCCCTGGGATTTCGACAGACACACCCTCTCTGCGCCCGGGCCCGAGGAGCTGTCAAATTCGAAATCCCCG                                          |
| Dpep3         | NM_027960 | GTGCCTGAAAAGTGTCTGGTGCCTTCAGTGGGGTCAAATATTCTGTGATGTGCTAAGTTCTGTGTAGAGGAGTG                                                            |
| Nfat5         | NM_133957 | TTGATGCTGTTCCGTGGCGCGCCTGTCCGCCCTCCGCCGGCCAGGCTCTTCCGGGCTCCCGACCTCCCCCTCCGC                                                           |
| Nfat5         | NM_018823 | TTGATGCTGTTCCGTGGCGCGCCTGTCCGCCCTCCGCCGGCCAGGCTCTTCCGGGCTCCCGACCTCCCCCTCCGC                                                           |
| Cln3          | NM_173876 | AGGTTGCATTCTCCATAACCAACAAGGCAGGGCAAGTAAGCAGCTCACTGCAGCACGGAGGACAACAGCCAGCCTGTTCCCA                                                    |
| Armc6         | NM_133972 | GTCCTCACCGGGTCTACGCAGCCACGTGGGGAAAGGGTGGGGCTCGCAGCTGTCACCCGAGACTT                                                                     |
| Sfrs14        | NM_172755 | GTCCTCACCGGGTCTACGCAGCCACGTGGGGAAAGGGTGGGGCTCGCAGCTGTCACCCGAGACTT                                                                     |
| Nr2f6         | NM_010150 | CAATCTCAGCAGGTGCCCTACTGCTGAGCAACCACCAGCCCTCTACTTCTGTAAATGCTGGTTCTAAAGCAGCCTGGGGT                                                      |
| Ier2          | NM_010499 | ATTCAAATAACCCCTTTCATTTGCTGTGCAGGCCCTTTAAGAAACACCCCTGCCAGCGGGCAGACTTCCCGCCACTGCAGCCGGCCGACTTCCC                                        |
| Junb          | NM_008416 | ATACTGAATTTGTCAGCTGCGGAAGTGCCTCCGATTGGCCGACGCGGGAGCCAGGCCCCCGGGCCCCCTCCTAGAGCGTGGGGAAGGGGAGGAGGCGGCTC<br>GCGTCACTGTCAGGAAGCGCTGTCCTTG |
| Mt1           | NM_013602 | CTTCTGGTGTGTCTGAAGTCAGCTACAGTGTACTTAAAATAATAAATCTTAGCCGGGCGTGGTGGCGCACACCTTTAA                                                        |
| Mt1           | NM_013602 | AGCCAGTCGTGCCAAAGGGGCGGTCCCCTGTGCACACTGGCGCTCCAGGGAGCTCTGCACTCCGC                                                                     |
| Gfod2         | NM_027469 | ATCCAAAGCACCGATACCGGGAACACGCCCTGGTTTCTAAGGAACAGGGGTCTCTGGTAC                                                                          |
| Vps4a         | NM_126165 | GCCCTTTACCGGTATCCACCAGACCCCGCCCCGGCAGGCCCCGCCCTCTTAGAGGAGCGGTGTCTGCAGTTGCAGGCCATGGCCAC                                                |
| Sf3b3         | NM_133953 | GAATCGCTTCAAGGCCTAAGCCACCGCCACTGCCGATCCGCCGGCGTCCGCCATTAGCCTTCAAGACGGGCCCTTCGGGTGCCGCGGAC                                             |
| Cog4          | NM_133973 | GAATCGCTTCAAGGCCTAAGCCACCGCCACTGCCGATCCGCCGGCGTCCGCCATTAGCCTTCAAGACGGGCCCTTCGGGTGCCGCGGAC                                             |
| 1700030J22Rik | NM_027103 | CAAGTCGCGGCCCCCAAGAGCCGGGCTGTTGCCCTAGGTTACGGCCGCGTCCGAGGGCGGCCCTAGGTGCAGGCATGCCGGAAGTGACGTAACCCC                                      |

|           |              |                                                                                                     |
|-----------|--------------|-----------------------------------------------------------------------------------------------------|
| BC019943  | NM_144927    | CTCTAATCTACACAAGAACCAGAAGTGGAGGATCCTCCTAAGTTCATGTCAGACGGGTAATGTGCCACGTCGTAACAAGGTTTATGGGCGGCAC      |
| Gsr       | NM_010344    | ACGCGCTGCGGGGCGGGGACAGGGGCCCTCGGGCGCGGTGCTTAGTACAGGGCGACGCTGCACCC                                   |
| Zfp42     | NM_009556    | AGAATCCCAGATCGCCTGGCCTTGAGACTCAGTCACATCTCAGTACCTCTGTTACAGACTTGTAACCGAATTTACACAAG                    |
| Hmgb2     | NM_008252    | CCTCTCTAGACCGGTTCCAACGGGTCTGGGAGTTAACGACCTGGGAGACCCACCGAACCTGCTAGGCTTAGCCTGGAGGGACGGGC              |
| Arrdc2    | NM_027560    | GGCTCGTATTCACTCCTGAGCCCAGCTGTGTGAACGAACACAGGTTACAGCCTTATGAACCAGGCTGCAG                              |
| Gesh      | NM_026572    | CGCAGGCTGTAGGCCACAACCCGCAAGCTCCTCGACACTTGCAGCGACATGGTCAGAGGTCCGGAGGGTAAGTGCCTTCGCCTCCGCCACCGGGCCGGT |
| Taf1c     | NM_021441    | GTCTCTATAGCCACGTGGTCTGCCACGTGCTCTCAGCATTTCCCGAACAGCCTCACCTGACCCCG                                   |
| Itgb1     | NM_010578    | GAGTTCAGGGCAGATCTCTGTACCTGACTATTTCCAGAAATTGCCCTCCCTGCCTCTGCCTCTCTGCCTCACTGCC                        |
| TdGF1     | NM_011562    | TGGTGGGGGGGGGAATCTGCTATTTCCGAGAAGGCTGGGCCTCCTTCATTAACAAGCTAATGG                                     |
| Lrrc2     | NM_028838    | TGGTGGGGGGGGGAATCTGCTATTTCCGAGAAGGCTGGGCCTCCTTCATTAACAAGCTAATGG                                     |
| Lrrc2     | NM_028838    | GAGGGACATCAGGGATTTCTGGAAGAAAGCTTTGCTGGGCGTTCATGTGACTCATGTTT                                         |
| Icam1     | NM_010493    | GCCCTCGTTCCGGAGGGGAAGGCGCGAGGTTTCCCGGAAAGTGGCCCCGACAGCACCGCCCT                                      |
| TdGF1     | NM_011562    | AGGACCCTCAGGTGGGCGGGGAGACGGGGCCCCACGCCATTACGGGGCCCCACGCCAT                                          |
| Cmtm6     | NM_026036    | GAGGGCGGAGTTGACCGGAAGCGTGGGCGGAGTCCCAGGAAGTACGCCCCCTACCGCTCG                                        |
| Loh11cr2a | NM_172767    | GTCTTCCTGGAAGTCTGCTTTAGTTACTTTCACTTTTAAAGCTGCGGAGACTTTAGGAGGT                                       |
| Tmem24    | NM_027909    | GGGTGGAGTGGGGGAGGGTTGAGTTGCACACGTAGAGGATTCCGGGATGAGAATAGGCGGAGTCT                                   |
| Gtf2a2    | NM_001039519 | TTCCCGAGCGCCAGCAGGAGAGACCACGCCCTTCTCGGAAACGGCGGTGGGGGCCGGCAGTGGCTCCTGTGGCGTACC                      |
| Vill      | NM_011700    | TGTTGCCACAGGCTGAGTGAAGGAAGGTGCAGAGGCAGTTCCGAGAAGGTAGGCCTGGACTGGGGTGGGGTGGGGGACCCGGTAGAGGGGTTGC      |
| Pkm2      | NM_011099    | GTGGTAAGGATGTGGCCATCAGTGGGGGAGGAGCTTCTTCTGCCTTTAATTCTATCTGGG                                        |
| Smad6     | NM_008542    | GCACCACGCCCTTTCCGGGACAGGAGCGGGGCCCGAGCTCAATGAAAGAAATTCCGCTACTCTCATTGGCCTGG                          |
| Plekhq1   | NM_153119    | AATGGACGGAAGAACCTAGGCGGAGCTGAAGTAGCAGGAAGAGGGCGGAGAGAGGTTTCCCGACCAAAGCAGGGAGAAGGACTGGGAGGGGGTAGAG   |

|               |              |                                                                                                                      |
|---------------|--------------|----------------------------------------------------------------------------------------------------------------------|
| Plscr1        | NM_011636    | CCATTTTCATTCCACCGAAACACCTCTCATCAGGCCTTACCTTGAGTGCCTCCTTTCTCATGCTTTAG                                                 |
| Stag1         | NM_009282    | GCGCCTCAGCTCCCTCCCCTTTCCGGGCAGGCCCGTCTGTGTCAGCGGAGCAGTGAGCAGCGCGCCAGCAGAGGGCGGTTCGGG                                 |
| Cish          | NM_009895    | GTCTCACGTCCAGCGATACGATTGGTCAACTCTAGGAGCTCCCGCCAGTTTTCTGAAAAGTTCTTGAAAATCTGTCAAAGGTGTTTCCTTTCTCG                      |
| Trim71        | NM_001042503 | GTTATTGGGACTGATCGGAATTCGGAATCCTTTTAATCTCCAAAGGAGCAAACACTACTTCC                                                       |
| Arhgef12      | NM_027144    | GGCGCGACTGGAGCGCGCCGAGCCGTCCCCTCCCCGCGACTTTTTTGGGCCCTTCTCCCTGGGACTTCGGGAAGCCGCTTACCCC                                |
| Scap          | NM_001001144 | CGCGCCGCTCGTGCCCGGGAGTTCGGGATGCGGGGCGAGCCCGGGCAGGGGCGCGGGCGTGGGGCG                                                   |
| 9530077C05Rik | NM_026739    | GTCCGCGTTGTGCACGCTGGGAGTTGTAGTTGCTTCCCTTCTCTCCCTACGAGCAGGGTGTGAGTCGAGGAGCGCCTCCAGCGGCGAGCATGTTTGGTGGCG<br>TGGAGTGCGG |
| Bcl9l         | NM_030256    | GAGCCTCTAGGGCTCAAGACTCCTCCCCTTCCCCTCCCCACCTTCTACCGGATCTCTGCTGGGGGCGGGGAAAAGGGGACAGAGCAGGGGGCGGTTGCTTGAG<br>GTGTCT    |
| Suhw4         | NM_146224    | GGCGCATATGGCCGCGCTCGCCTCCCGGTTGGCGGGAAGACTGGGAGCGCGGACGCGCGAGGC                                                      |
| Parp16        | NM_177460    | CCGGGGCGGGTCCCAGGGCGGTTTCCACTTGGGGCGGTGGCGAGGATGACTAGCAGCCGCATTGGGCA                                                 |
| Ttk           | NM_009445    | AGAAGCGTTTCTCCTAAGAGCAGCTGAGCTCATAACTGAGACAGCATCACGGGGATGGGGGCGGGGGGGGGAA                                            |
| 2610101N10Rik | NM_026476    | CTCCGCGGCGCCGGGGCCGCTGACTTCCGCGTGCAGGGCGTTTTACGCGCCCCGCCACCCCG                                                       |
| Slc25a36      | NM_138756    | CTTCTCCAGTAAGGCTTTACCGCCGAACCTCTCCAAACAGTGCCGCAACTGAGGACCGAAGTATCACATGCCGGAACATGGGGGGCATTCTCATT                      |
| Icam1         | NM_010493    | TCACTGCGAAAAGCAAGAGCAGTGGAGCACGAGGCAGGATCGGGAGTTCAAGGTCATCCTCAACTACAGGGCGTTTGAGGT                                    |
| Spbc24        | NM_026282    | GTTTCTAGCTGTGCAACTTGTGCCAGTGACCTTGGCACAAGATCTGGCAGGTTCTACCAGATC                                                      |
| Hspa8         | NM_031165    | GACCGAGGGTCTGTGTGGGGGAGGGGCGCAACAACCTTCGCAGCCATTTTGTCTCGCCCCACTTCCGTCTT                                              |
| Gclc          | NM_010295    | CCCCGCGGGAACGCGGCAGCCTTCTGCTCGGGACCGGACCCCCGTGGGCGGCCAGCCCGCGC                                                       |
| Parp3         | NM_145619    | CTCCTAAGAAACAAGTTCCAAGTCTGGGATCCCATCTAGCGACCCTTCGTGAGCCTTCAGCTAGTTTTT                                                |
| Rnu3ip2       | NM_145620    | CTCCTAAGAAACAAGTTCCAAGTCTGGGATCCCATCTAGCGACCCTTCGTGAGCCTTCAGCTAGTTTTT                                                |

|               |           |                                                                                                                                     |
|---------------|-----------|-------------------------------------------------------------------------------------------------------------------------------------|
| Ube1l         | NM_023738 | CTTCCCTCTCACACCGCGTGCCTCGTGCTGAAGACAATCCAACCACTTGCCAGGAAATGGGAGGAGCCTGAGG                                                           |
| Dalrd3        | NM_026378 | TGGCGACGGCGCAGCGCTCCATGAGAGGCGTGGCCGAGCATGGATTGGCTTCCCGGCAGCGCGAGGGGGTGTGG                                                          |
| 4733401H18Rik | NM_023247 | TGGCGACGGCGCAGCGCTCCATGAGAGGCGTGGCCGAGCATGGATTGGCTTCCCGGCAGCGCGAGGGGGTGTGG                                                          |
| Myd88         | NM_010851 | TCCAGTACGCTCGCCTGTGGAGTTTCTACTTCCCTTAAGTCTCCTGCCAGCCCCCTCTTCTTTTCGCTTCCGAGAAGCTCCGCCCTTTGCTAGAATCTAGACTAC<br>GGGGCCAGAACTACCCAGCCTA |
| Acaa1a        | NM_130864 | TCCAGTACGCTCGCCTGTGGAGTTTCTACTTCCCTTAAGTCTCCTGCCAGCCCCCTCTTCTTTTCGCTTCCGAGAAGCTCCGCCCTTTGCTAGAATCTAGACTAC<br>GGGGCCAGAACTACCCAGCCTA |
| Sec63         | NM_153055 | AGGTTTGGCAACCTCGCTTAGGTTGCAAAAGCTCAGGTCCCAATCGCACCTAGGACGCTCGCCTCTGCTC                                                              |
| Socs2         | NM_007706 | GCCGAGTGTGCGCGCGACTTCCCAGCCCGACGCGCTCCCTCGCTCCCCGCTCCCGCCCCCTCGCGCC                                                                 |
| Tbc1d15       | NM_025706 | CGGTCCGGGCTAAAATAACATCCGGGCGGGAAAGGGGCGGGGAGGAGCGGGAACAGCAGTTAGGCGCATGCGT                                                           |
| Dnm3l         | NM_019448 | CCTCAGAACTCTCTCCCTCCCCACCCCTTCCCCGAAGCCCTCTCCACTCTCAAGGCTT                                                                          |
| Cd63          | NM_007653 | CCGGCTCCTGGCTCGAGCCTTCCAGGCAGCGGCCACGTGGCCTTGTCTGGCGGGGGGCT                                                                         |
| Cdc216        | NM_198164 | GTGCTTCCCGCTTTTCTAGCCTAATGACAGTCAGGGCCGGGTATCTACTTCCCTAGCTCAGCAAAGGTG                                                               |
| Crsp3         | NM_027347 | CAGCGCTGTCAGCTTACGGGGTCACCTCTACGAGCGGAACCAACAGGCTGAGATACAGATTTTCAGAGGGGCTGG                                                         |
| Suhw2         | NM_177475 | AGAGAGAGAGAGAGAGAGAGAAGAGCCTTTGGGGTGGGGGAAGGGAAGGGCAGCCAGCCCTGGGC                                                                   |
| Ikzf4         | NM_011772 | GGGTGAGCCAGCCACTCACCTTCCAGGAAGCGTGGATTCTGGAAGTGAGGGGAACCGCCGTCATTTTCGAGGCAGTGGCAGCCGCACGGTGAGCAGGGGC<br>CCACGGCTGCAGCCGG            |
| Tfam          | NM_009360 | CTCTCTTGAGGGTAAAGGGGACTTCCAGCTCGTCCTTTCAAACCTCCTGTCAACAACAGCAACAAGA                                                                 |
| Ptges3        | NM_019766 | AGCGGAGCGAGGCCGCGCCGGGAGCCCCGGCTGCCGGAAACGGCCCCCTGCCCTCCCCCACCCTCGGCCCTTCGCCTTTCTC                                                  |
| Pdss2         | NM_027772 | GGGGTGCCAAAGGGCGGACACCGACGTCTGGGGCACAGGCTCCCTTCCATCTCTCGCCTTCCGG                                                                    |
| Midn          | NM_021565 | TTCCCGTCCGCCCCCCCTTCCACACGCGGGCGCCCCAGGGCGGAAGCACCAGGCCAACAGGAAAGGGGGCGGAGCAGGGAAGCAGGCCAAACACCCCCC<br>AATCCTAATGTGAGGT             |

|               |           |                                                                                                                                                                 |
|---------------|-----------|-----------------------------------------------------------------------------------------------------------------------------------------------------------------|
| Syn3          | NM_013722 | CTCCCTAAGGCCAGAAAACCCACCTACTCCACTTTGCCTTGGCTTACCGACAGTGCCAGCTACGGTGGCCCGTGTGTACCTCGGACTGGCGCCGCCAATTACAG<br>GATCTGCGGGAGCGCTG                                   |
| Helb          | NM_080446 | TTTCCAAGGCTCTGCTACACAGTTTGAATTACTACCAGTAACCAACTGGAGACAATTGTCTTACTTAGTTG                                                                                         |
| Mbc2          | NM_011843 | AGGGTTGGATGGCGGGAAAAGGGGGGGAAAAGAAACCAAAAGACAGTATTGACTGGTCACGGAGAGAACGGGGCGTAGCGTC                                                                              |
| Ndufs7        | NM_029272 | GGAACTCTTTGGAGGACGGACCGCAGAGGTTGTCTGAAGGCCGAGGCCAAGATGGCGGCGCTGGCGGGTG                                                                                          |
| Ap3d1         | NM_007460 | GGTGGAGCTTGAGCAGAGGACCTCAAAGCCCCGCCCCAGAGTGACACACTTCCCTACCAGGTCACGCTAGTCCAGCAGGGCCACACCTCCCAACAGTGCCACT<br>TCCCATGGGCCA                                         |
| Mgat4c        | NM_026243 | ATTATTTCTCAGGACAGTTTCTAAGAGCCCCTAACAATAGCATATTTGCATACTGGGTTCAGCAATGGTCAGGGTGGGTGAGGGTGACTTTCTTTGAATGAACAC<br>TCCTTTAACCCAGGAAGCAGGTGGGTGGAGGAATGTCACTGTTTTATGAT |
| Stat3         | NM_011486 | GGGGGGAGGGAGGAGACATTAGCGGAATGTCCTGCTGAAAACCTCAGCTGAGTTCCTGGCAGT                                                                                                 |
| Stat3         | NM_213659 | GGGGGGAGGGAGGAGACATTAGCGGAATGTCCTGCTGAAAACCTCAGCTGAGTTCCTGGCAGT                                                                                                 |
| Stat3         | NM_213660 | GGGGGGAGGGAGGAGACATTAGCGGAATGTCCTGCTGAAAACCTCAGCTGAGTTCCTGGCAGT                                                                                                 |
| Socs3         | NM_007707 | TGTAATGTTTAGTCACTACTCTGCACTGAAAGGCTGTGCGCGGAGGGCGAGGGAGGGGCC                                                                                                    |
| 6030413G23Rik | NM_178664 | CGATGCACAGACTGGACCGCTTCCGATTGGTGCAGAGCCACGTGGCTCGCTAGGGACTTACGGGTATGGGAGGGCTGTTAGGGGAACAG                                                                       |
| Hoxb13        | NM_008267 | AGACTCTTAACTTTCAACTTGGCCTTGACCTTCCCTGGAAGTGTCTGGCGGGTATGTAAAGG                                                                                                  |
| Cnp1          | NM_009923 | GTTGTGGGAAGATCTGATACAGTGTGACAGTACCATTGTGGGAGGGTCTGATACAGTGTGACAGTACCAGAGCAGT                                                                                    |
| Arhgap27      | NM_133715 | ATGCCATCCACATACATGAGAATACAACCTACACACCATCCACATACATGAGAATACAACCTACGTGCCATCCACATAGATGAGAATAC                                                                       |
| Cobl          | NM_172496 | GATATGACCCTGGACCTTCCCTGGACATCCTATATCTACTAGAATAAACCTAGACCAGATACAGGGT                                                                                             |
| Tha1          | NM_027919 | CTCTGCCTGATTCCCGAATTCCAGTCCTTAGAAAACAAACCCTTATCTCATTGTCTGGCTCCAGGCTTCTGCTGGG                                                                                    |
| Mllt6         | NM_139311 | CAGGTCAAGGACAAGTTCTCCCCCTCTTGCTTCCCCCTCTGGGCGGGGACTCATCTCC                                                                                                      |
| Nf2           | NM_010898 | AGTATACTCCTACTCTAGCAAGACTGGTTGAGAAAGGAGCGGGCGGGCGCCTTTCCCGGGAAACCTGTAGAG                                                                                        |
| Upp1          | NM_009477 | GTTTAATTGGATTTGAAAGGGCCAGTCTTTTCCGGGACTGGAGAGCAGGGAATTTCTTGTCTCTTGAGTTGGTAAA                                                                                    |

|         |              |                                                                                                |
|---------|--------------|------------------------------------------------------------------------------------------------|
| Upp1    | NM_009477    | TCTGTCCTTGGGTGACCTTAGCCGAGAGTGAGAGCAGCTTCCCGCAATAAACCAGCATTGAATGTTATCTA                        |
| Rtn4    | NM_194052    | GCCGGGAAGGTGAGTCACGCCAAACTGGGCGGAGAGTCTGCCCTCCTCTCTCAGTTGCTCA                                  |
| Rtn4    | NM_194053    | GCCGGGAAGGTGAGTCACGCCAAACTGGGCGGAGAGTCTGCCCTCCTCTCTCAGTTGCTCA                                  |
| Rtn4    | NM_194054    | GCCGGGAAGGTGAGTCACGCCAAACTGGGCGGAGAGTCTGCCCTCCTCTCTCAGTTGCTCA                                  |
| Rtn4    | NM_194051    | GCCGGGAAGGTGAGTCACGCCAAACTGGGCGGAGAGTCTGCCCTCCTCTCTCAGTTGCTCA                                  |
| Psm3    | NM_009439    | TCCTAGAAGATCCGCCTTTCATCGTGCACCTCGGCTGTTGATTTATTTCCCTCCCTGGAC                                   |
| Map3k14 | NM_016896    | GGCTGCATTCTTTTTGAGGTTACGGGAAGGAAGGGCGACTGTACGCATGCGTGGGCATTCCCGGC                              |
| Vdac1   | NM_011694    | CTCCCTGTACGCCCTGTGACTCAGCAGCTTTCCTGCCTGGCTTTAACTCCGGGAATGGGCTGGGTGTTTGTGCGGGTAGATAGAGCTGCAGACT |
| Pipox   | NM_008952    | TTTGTCTCAGGACTTTGCCCGGAATTTCAATGCCTCCAGACCAAGCTGGGCCCGGGAATGCTGCCTCCCC                         |
| Nme1    | NM_008704    | ACAAAACAAAAAGGTGGGTCTGTTGACGCAGCCCTTCACTCCAGGAACCTGGCAGGCAGGCTAAGACAAAAGGATCACAAGTTCAGT        |
| Irf1    | NM_008390    | TGGCGCGGGCCCGAGGGGGTGGGGAGCACAGCTGCCTTGTACTTCCCCTTCGCCGCTTAGCTCTACAACAGCCTGATTTCCC             |
| Tcam1   | NM_029467    | GCCCTTGGGGGAGGCGGCCTTTTCCCGGAGGAGCGGGAGCGGAAGCTGCACGCGGAAGCGCGGAGG                             |
| Ddx5    | NM_007840    | CAAAGCACGCTGGGAGCCGCTCTATGACCTAATCACCCCGCCCCCTGGCTCGGAGGCCCTCAACGCC                            |
| Ccdc45  | NM_177088    | CAAAGCACGCTGGGAGCCGCTCTATGACCTAATCACCCCGCCCCCTGGCTCGGAGGCCCTCAACGCC                            |
| Vdac1   | NM_011694    | GTGTATGACCGTGGGCCCGAGAGCGCTTGAATAAGAGTCCTCTTGACAGTTGACAGCAAGACCGTTTCT                          |
| Asb16   | NM_148953    | GCGAATGGGGCGTAGTTTCCAAAAGTCTCATCCCTTCAGTCTCCACTTCCAAGGTCAAA                                    |
| Pnpt1   | NM_027869    | CAGAAAGCCTGCAAGGATTGCTTTCCCGCAGTTTGCAGGCTCCACGAAACGAAACTGCGTCCGACTCCGCCC                       |
| Gfpt2   | NM_013529    | TTGGGCCAGGTCTTTTCTCAGGAGATGAGGGGGCTGGAGAACAGAGAGGAGGAGGAGACAGCCGGGAA                           |
| Trim25  | NM_009546    | TCTTTGGTCATTTGAGCCTACACACAGTAGGCCTCTGGCTCCCCACCCCCACCCTTAACCTTTGATCTGCACACATTCCTGCACTAAGCT     |
| Socs3   | NM_007707    | CTGGCTCAGGTCTCTAATCCCTGAGATCAAAAGGTAGAGGCAGGAGGACCAGAAGTTCAAGGT                                |
| Xpo1    | NM_001035226 | GGCCCAGGTTCCAAACGCTCCGCGGGGCCATGGGCTGAAAACCTCAACCGAGATGGAATCTCCCAGTCTGAACCGGT                  |

|               |              |                                                                                                                   |
|---------------|--------------|-------------------------------------------------------------------------------------------------------------------|
| Xpo1          | NM_134014    | GGCCCAGGTTCCAAACGCTCCGCGGCCATGGGCTGAAAACCTCAACCGAGATGGAATCTCCCAGTCTGAACCGGT                                       |
| Cyb561        | NM_007805    | CGGGTTCGGCGCCCGGGTTCCTAGCTTCTCGCTCGCTACTCTCCACGCCCAAAC                                                            |
| Slc16a6       | NM_134038    | CGCCCGCGCCCGGCCCGCTTCTCTGCCTATCTCTTATCCTATACCGGCTGCAGCCGGTCTCCGCCG                                                |
| Slc16a6       | NM_001029842 | CGCCCGCGCCCGGCCCGCTTCTCTGCCTATCTCTTATCCTATACCGGCTGCAGCCGGTCTCCGCCG                                                |
| Rnf185        | NM_145355    | TGAACCTCCGACCCCTCCTACCGGGAAC TTGGTCACCTGACGCGGAGCCGCTCTAGTAGAACA AACTTCCGGTTCAGCCGGAAAAGGC                        |
| 8430429K09Rik | NM_027820    | TGAACCTCCGACCCCTCCTACCGGGAAC TTGGTCACCTGACGCGGAGCCGCTCTAGTAGAACA AACTTCCGGTTCAGCCGGAAAAGGC                        |
| Figl1         | NM_021891    | GAGGTGTAGCCTCCGGGCCCCACTCCAGAGCCTGCCGCCCGGCCCTCCGGCCTTAACCAGTTCAGCAGCAGCTATCAAATAGTGAGACTCGAATACAGG<br>AAGG       |
| 2010316F05Rik | NM_026465    | GCCCGCAGCTCCGAGCCTGCCATTTCCCTCTACGTGGGCAGGCTTACCGGAAGTGCCACGGCTTCGG                                               |
| Scgb3a1       | NM_054037    | GGGAAATTGTGTTTTGTTTTGCCATTTTCATCATTGGTGATCAAATCCAGGGCCTTCCTTTTGTGAGACAAGTACTCCACTGGTGTGCTCTACGGTTCAGCCCA<br>G     |
| Scgb3a1       | NM_170727    | GGGAAATTGTGTTTTGTTTTGCCATTTTCATCATTGGTGATCAAATCCAGGGCCTTCCTTTTGTGAGACAAGTACTCCACTGGTGTGCTCTACGGTTCAGCCCA<br>G     |
| Wdr79         | NM_144824    | TCCAGGGATGCCTTCTTATGCAAATAGCCTCCCTGCCTTGCAATCTCTTTGACTGGATTTAGTGAAG                                               |
| Eif5a         | NM_181582    | CCACTGTGCTGCTTGCGGCGTCAAGAACGCATGCGTCTGAGCAGGCGCCACACCTCGGCTTTAACTGGAATTGAACAACCTCACAAACACGTTTCTGAGAACCTT<br>TCTA |
| Nr1d1         | NM_145434    | GGCCGCACGCGGCACTGGAGCAGGTACCATGTGATTCCAGGGAGCGCCTCGTGCCCCAGTGACACACTTTCCAGCAGCCGGCACGTTGAGAT                      |
| Fasn          | NM_007988    | CGCGCTCCCTGAGTTTCCGGGACCTCTCCCTCCCTCCCTTTAAATTCTCTTTTCAAAGGGTT                                                    |
| 4930412M03Rik | NM_177098    | ACCGGCAGCCAAGGCCCGCCCTGGTAGAGCCGGGCCCTTTCCGGGATTGCAAAGCCG                                                         |
| Ndp52         | NM_029755    | CCCCACACCCTGCCCTGCCTGTAGACCCTGTCTCAAGGTCTGAATTCCGGGATCCAAGGGCTCAATTGCA                                            |
| Tmem106a      | NM_144830    | GGCGTTGTACCTGGTAAGGCGTCCCTGGGACCCCATCTCTTTACCCTTTTCAAAGCAAG                                                       |
| Rps27a        | NM_001033865 | TTAGAACTACTTGTCCAGGATGCATTTCCACACTTCCCGGATACCTGATTACACTGTCTAAGCTGTGGAGTGAGGGTTAGGAGAGAGTCAGGTGAG                  |



|               |              |                                                                                                            |
|---------------|--------------|------------------------------------------------------------------------------------------------------------|
| Rps27a        | NM_024277    | TTAGAACTACTTGTCCCAGGATGCATTTCCACACTTCCCGGATACCTGATTACACTGTCTAAGCTGTGGAGTGAGGGTTAGGAGAGAGTCAGGTGAG          |
| Alkbh5        | NM_172943    | GGCAGTCCCGGGACGTGACTTGTGGAACGTCCGCTTCGGGAAGCGATGGCGGGCGGAATGGGGTGTGGGTGCC                                  |
| Rpain         | NM_027186    | CAGAATCCTTTGCGCGGGCTAAGGGGCGGTGATTGGGGCGCTGTTCCCGCTAAGGGAGGAGATGGCAGAGTCCTCGGGTCTCCGCACCGCTTGTGTAC         |
| Nup88         | NM_172394    | CAGAATCCTTTGCGCGGGCTAAGGGGCGGTGATTGGGGCGCTGTTCCCGCTAAGGGAGGAGATGGCAGAGTCCTCGGGTCTCCGCACCGCTTGTGTAC         |
| Flot2         | NM_001040403 | CCCTCTTTTCCGGGTGAGGCAGACCCGTTAATTCCGAGCAGGCTAGGGCTTGCCAGGAATTACTGCCATCACCCGCCCTGCAAACGCGGGTGC              |
| Flot2         | NM_008028    | CCCTCTTTTCCGGGTGAGGCAGACCCGTTAATTCCGAGCAGGCTAGGGCTTGCCAGGAATTACTGCCATCACCCGCCCTGCAAACGCGGGTGC              |
| Cdc42ep4      | NM_020006    | GAAAGTTCCTAACTACTTAAAGGAAGTGGGGTGGGGTGGTGTAGGCCCTCAGCCTCTTTTTCCCCAGAGTTGCCTCACGGTCCCTCAGCT                 |
| D230014K01Rik | NM_172573    | ctcctttatttacaattaaggtgggaagcaggttactagaaatcacccagtgctgactcactccttggcgag                                   |
| Fos           | NM_010234    | CCCTGCGCTGCACCTCAGAGTTGGCTGCAGCCGGCGAGCTGTTCCCGTCAATCCCTCCCTCTTACACAGGAT                                   |
| Mycn          | NM_008709    | TACATACACAGCAGGGGCTGTATGGTAAGTGTTCCTGGATGCCGCTGGAGGTAGGCTCCATTG                                            |
| Odc1          | NM_013614    | GGAACCGATCGCGGCTGGTTTGAGCTGGTGCCTCCATGACGACGTGCTCGGCGTATAAGTAGCGGCGGTCCG                                   |
| Sntg2         | NM_172951    | AACCCCGCCATCAGCTCTGCCCTTCCACCTCCTGTCAGTGAGGGTGAAGTGGTTTGTG                                                 |
| Arf6          | NM_007481    | CCAACTCGAGTACAAAAAGTGCGGGCTACTTTGGCGGATTCTATGGAACACTGGCCTCCCA                                              |
| 4930534B04Rik | NM_181815    | TGAACTAGCCGCCAGGCACCGCTAGAGCACAAGACGCGCCGCCGCCCTGGCCCTCTGGGAGCTGTAGTCCATCCCACACTCC                         |
| Smoc1         | NM_022316    | GGAATTCCCATGGCCCGAGCTCCCGCATCAACCTGCTGTCGCCCGGGCCACGCCGAGCGCAGCAGGCCACGCGCAGAGCACACGC                      |
| Adck1         | NM_028105    | GGTGGCGAAAGCACTGTTTCTGGAATTTGGGTTCCGGGCTGCGCGGGCGCAGCTTCCCTACCCTCTGGTGAGTAGCACCCGCGCACAGAGTCCTGGCCAAT      |
| Ankmy2        | NM_178910    | TGGGTGGCCAGGAAAGGCAGAGAATTCAGGAAGAGAAAAAAGAGGAACAAAGGGTGGAAA                                               |
| Ankmy2        | NM_146033    | TGGGTGGCCAGGAAAGGCAGAGAATTCAGGAAGAGAAAAAAGAGGAACAAAGGGTGGAAA                                               |
| Twistnb       | NM_172253    | TTGTGGACTGCAGATGAGTAGCCTGGTGAAGGTCAGTCCCAGAGTCTGCCAGTTGTTCCGGGAGAATGATCTGTCTCCGAGAGCACTGGGTGTGAGCTG<br>TGC |

|               |           |                                                                                                                                          |
|---------------|-----------|------------------------------------------------------------------------------------------------------------------------------------------|
| 1200003C05Rik | NM_024205 | GAAGCAGGTTTACAGGAACTCATCTGAGTGCTGACTCATTCCCTCGTTCGCAGTCCCTCACCGGAGAACAGAATTG                                                             |
| Ckb           | NM_021273 | AGAGCCACAGAGCCGCCGACCTTCTCAAGGTGCTGCGGGCATCTCCTGGGTGTTCTTGGTGCAACACCAGAGG                                                                |
| Brf1          | NM_028193 | TGTGCGCCAAGGCCCGCCCGTGGAGCCTGCACTGATTGGCACAATAGGCTTTGGGAGCGTCTGGGCTGGATGTAGTGGGAGTAACTTGGGGAGTCAGCAA<br>GCCCTAGAGGGCAGGATCAAGGACTGCCGGCG |
| Nup153        | NM_175749 | GGAGCCTCTGGGAAATGTAGTTTTTCTGGCCAGAACGCGGATTCTCGGAAAGGCAGGCTA                                                                             |
| Map3k1        | NM_011945 | TCTCCCCACCCCAACAGATGCTCCCAGCTGCACGTCCCTCTTCTGGCAGTCAGGTGACA                                                                              |
| Tmed9         | NM_026211 | GGCCAAGCAGCCCTTTTATAGAGCCAGGACTACCTGACTGTTGCCAGGTAACGTGGGGCG                                                                             |
| Il6st         | NM_010560 | GCTCAGCCTCCGGAATCCCGGACGCCGGGAGCCGCGTTACGGGAATCGCAGAGGCCTGCAGTCCCGCCCTTC                                                                 |
| Hist1h4a      | NM_178192 | ACATCACAAACCCCGCCCTCAGCCAAGACCCGAAAGCGCGCCGGCGGGAAAGCGACATCACTGATCCCTCCTCT                                                               |
| Hist1h1a      | NM_030609 | ACATCACAAACCCCGCCCTCAGCCAAGACCCGAAAGCGCGCCGGCGGGAAAGCGACATCACTGATCCCTCCTCT                                                               |
| Cart          | NM_013732 | TTGAAATCGGGTGCCGGGAAGAGGGAGGGGGAGAAGAAGGACGGGGGTGTGGAGGAGAGCCCGGG                                                                        |
| Hist1h2bb     | NM_175664 | CCCTCTTCTGAGTTTCTCATTTCTCTCTGGGTCTGGTGAAATGAACTCTAGTTTCTGGAAATACCTCACTGA                                                                 |
| Ippk          | NM_199056 | CCGCGTTTCGGAAGTGAGTCACTCTGCCAGCACATAATATGGCTTCCACTCCACCTACCACCCTGGACGTCGAGGGTAAGGTGGGCGGG                                                |
| Hist1h4k      | NM_178211 | CCTGCAGGGAAGAGGCGGGAAGTTGCGCCCGCAGCTGTGGGGGAGGGGAAGACTTACCAA                                                                             |
| Hist1h2bn     | NM_178201 | CCTGCAGGGAAGAGGCGGGAAGTTGCGCCCGCAGCTGTGGGGGAGGGGAAGACTTACCAA                                                                             |
| Peci          | NM_011868 | GGAGGCTTAGGCCAGCAGAACTGCAGGGCAAGACCGGGAAGGGGCGGAGCCAGAGGTGCGCTC                                                                          |
| Arsk          | NM_029847 | GGTGTCTGCTCCCGTCCTTTGGGTACTTACGAAGGAGTCACTGGCGACCAGCACCGTTGGGCGCCTGGTTC                                                                  |
| Eef1e1        | NM_025380 | GGTGTGTGCCAGAATGAGCAGGGTCTATTCCGTGTTCCCTCCGCCAGGCGGCTTCCAGGAATCTGTACCCTCGCCC                                                             |
| Zfp459        | NM_177811 | AGGAATCTTACGATCACAGGACTCCAGTCCAACCTTCGGGAAGATTGACGAGTGTGACCAAAGCCGGGTGGGATTTGCTTGTGACGTCGGAGTCACGTGG<br>GTAC                             |
| Atg10         | NM_025770 | GTTGTGTTGGCTGCAAACTGAAAAGCCTGCCAGTCACTTAACTTCCTTTGTTTCAAGGTCACG                                                                          |
| Elov17        | NM_029001 | GGGAACCGGCCCTACTGCACCCTGGGTTGCTCGGGGCCAGGCTCTACCCGCGGCGAGGGCGGCAGCGGGAGAGGCTGGCATGACACCCACCCCTCGGCGT                                     |

CA

|               |           |                                                                                                                                              |
|---------------|-----------|----------------------------------------------------------------------------------------------------------------------------------------------|
| Arl15         | NM_172595 | CCCCAGTACTGCACAGTTTGCCTTCTTTAAGGTGTCTGCCCTTCTAATCCGCAGGTCCAGGGCGTTTCAAGGCCACAGGAAGGCCTCGGGGCAACTGC                                           |
| Isgf3g        | NM_008394 | TCCCTCTGGTGGTAACCGCTTGCCTGCAACTCAGACCACGTGGTTTCTAGGAAATGCACCTCCCCGGA                                                                         |
| Zfp219        | NM_027248 | CTCTAGACATTGCTTTCCAGGAAAAGGTCAGTTTGCCTGCGGGGGGTGGGGGTGGGGGGGATATTTGCAATACT                                                                   |
| Spry2         | NM_011897 | GGGAGGGAAAGGGAGCGGGAAGTGAGGTGGGAGGGCTATTGGTTTTATTCTTTGTCTACTG                                                                                |
| Gzmc          | NM_010371 | GTCCTGCCTTCCCCACTTTTCCCTACTGCCTGCTACAGTATGTGGAAGACCAACTGTGTGCTACA                                                                            |
| Sncg          | NM_011430 | GCCTCCCCACAACCCCTTCTGTGTCTCCAGGGATTTCGGCCTCTGCACATTTCCAGGAGTGGGAGGAGGGCCTGAC                                                                 |
| D14Ert436e    | NM_172599 | GTTTTCCGGGGTCAATTCTGGGAAGGGAGTGTTCCTCACAACCTTACAACCTTCTAGCAGAAGGTCCCCAGCGTGTACTCTAGCAAGGACTTTCAGCGGTCACTCT<br>TTTGTCTCTAAGGTCACACATTCCACAGGT |
| E430028B21Rik | NM_178668 | GTGACTGGGCGGTGCCTCCGGGAAACACTAGGCTTTCTGTCAITTCAGTTGCTCCGGTTATGGCTGTGTGT                                                                      |
| Ednrb         | NM_007904 | GAGCACCTGCACATGGATTGACGTGTCTGTCCATATGTGGATGAGATGTGGTGAGCTGCCTGAGATCATGCCTTGACTTGCCCTCAGTGATGAAAGTCAAATC<br>ACCCTTTCCTTCCCGAG                 |
| Slc15a1       | NM_053079 | CACCCTTAAGGGTTGATGAGTCTTCCACATTCGCTTTGTTTATTCAATCACCTGCCCTTAGGAACTCCAGCCACCCTG                                                               |
| Tep1          | NM_009351 | GACTGGTTGGAAGCAGAGAACTGAAAGAAAACCAACACCCTAGTGAGGCCAAGGGGTGAGGCTG                                                                             |
| Pnma2         | NM_175498 | TCCCTCCCTGCCCACGCCCCCGCGCCGCCACGCCACCTCCGAGCAAAGTTGGATCTGAGCGGGCGGTGCTGCGGCAGAGGATGCCAGTTCCCGGAACGC<br>GGGGCGGGCGGAGTGGGGCGGGGCAGGAGGAACGCAG |
| Dcp1a         | NM_133761 | CAGCGGATGAGATTAGCTGAAGTACCACGCTCGGCAAGGCTGGGCCGGTAGGCGGAAGTGGAGGGCTGA                                                                        |
| C130032J12Rik | NM_178684 | GAGCGGGCGACCCTCCCCACATCCGCCTGCGTGACCGGCTGGGGGCTGGTTGCTCCGGTTGATCCCGATTCCCTTTGTTCCCTT                                                         |
| C1qtnf9       | NM_183175 | CCACTGAGGGTGAGCTCCTGCCCTTCAGAACAGAACAGTATCCTTATGCTCTTGAAACCGCTGCACGTTTGCCTGACCGTTAAGACAC                                                     |
| Clybl         | NM_029556 | AGGCGGGGCGAGGGCGGGGCGTAGGCGGGCCAGTCGGGAAGATGGCGTTGTGCGTGCTGCGGAACACGG                                                                        |
| Vps28         | NM_025842 | GGTGCTCGCTTTTTTCGCCTGCGCCTGCCGGGAAACCGATCGGCAGCTCGGCACTCATCC                                                                                 |

|               |           |                                                                                                                                     |
|---------------|-----------|-------------------------------------------------------------------------------------------------------------------------------------|
| Naprt1        | NM_172607 | TCCACCCCTACGGCACTGGTCCAGAGAACCAACTCACACGAAAGGAGGGCCTTTCCCGGCAG                                                                      |
| Pabpc1        | NM_008774 | GGAGAGGTGGCGGGCTGCCGTGCTGCGGGCTGGGGGTTGGGCCGAGGCGGGCGGGGCTTC                                                                        |
| Oplah         | NM_153122 | CTTGCTTGTGTCGCTTCCCGAAGGCCCTGCCCCACCTCGGGGTGGGGCTGGAGAA                                                                             |
| Mtmr12        | NM_172958 | ACTAGGAGATGCCCCACCCACCCTGTTAATCCTTCCTGGAAATGCTCTGTAGAACTGCCATA                                                                      |
| Sh3bp1        | NM_009164 | GTCCTGCCTCAGCCCCACCCAGGGTTCCTGGAAAGGCCTTTTGAAGTGTGGAAGTGGGGTGGGCAAGG                                                                |
| Ptk9          | NM_008971 | TGTCGTCACAAGCCCCGCCCTTAAGCCATTGGCCATGCCCTTTCCCGCAATCACCCCC                                                                          |
| Cbx5          | NM_007626 | GGGAAGTGGAGTTGGGAAAGGAGTAAAGACGGAGAAGGGGAGGGAGGGAGGACAGG                                                                            |
| Amacr         | NM_008537 | CCAACTGATCCAATGCTAGGGTGGGCAGGAAGTGCGCAAGCGCGCAGCCTTCCCGACGGGGC                                                                      |
| AK162044      | NM_177597 | CAGGGATGCCTACCTCGCCCTCATCCTTACTCCACGCGGGTCTCTGCTTGGCCACCGCGC                                                                        |
| Myc           | NM_010849 | AGGAAGCATCTTCCAGAACCTGGAAACCTGCAGCCCTGCCCCATCCGACCTCCGCCCTCGTTGGCTTCGCAACGCTG                                                       |
| 1700088E04Rik | NM_138581 | AGAAACTCCAAGGAGCTAGAGTGTACAGCGTCTACTAATCGCTCCTTGTTACCATGGTAACTAGCGACACGCCTCCACGCACGCGCATTAGCGT                                      |
| Polr2f        | NM_027231 | AGAAACTCCAAGGAGCTAGAGTGTACAGCGTCTACTAATCGCTCCTTGTTACCATGGTAACTAGCGACACGCCTCCACGCACGCGCATTAGCGT                                      |
| Ropn11        | NM_145852 | CATGGTGTGGGCAGCGGCATCGTTCTGGGGAGACCGCGGGCCTGGGACGTTGTGCTGCGGGGAGGAGAGGCAGGGT                                                        |
| Myc           | NM_010849 | CCTCCCCCTTCTGGGAAGTCCGGGTTTTCCCAACCCCCAATTCATGGCATATCTCGCGTCTAGCGCCTTGATTTTCCCACCCCA                                                |
| Apobec3       | NM_030255 | GGGACAAAGAGGTGGGCAGGAGCCTTCTGGGCTTGATCGCCTAGAGCCCTCCCATCCGGGAGCTG                                                                   |
| Mettl7a       | NM_027334 | CCCGTGACCTGGATGACCTGCACTGAGCTGCACTACAACACCTGAATTCCAGCGCTCTACAGTCATGTGGGAAGCAAAGACAGAAGTGCACGAAAGCCAGT<br>AAGTCAGCTGGT               |
| Cox6c         | NM_053071 | AAGACATCCTAGTTCGCCGCCCCACGAGAAGCCGAGAAACCCGAGTTGTCAAACCCAGAAATCTCCTCTCTCTCCACCATTCTCACCTCTACACCAACGTC<br>CTTCCCGGTTCTCGGAGAAACGGAGA |
| Zfp406        | NM_198644 | CAGGCGCGCAGGGCGCTCCCCTCGCTTGTCTCCACCGCCTCCCTTTTTTTCTTCTGCGGCAGGATCAAGCCAGCTTCAAACG                                                  |
| Jrk           | NM_008415 | TGCGGACCCCGTCCCGCCGCTACCGGCCGAAACGCCAGCCACGCAGCTCTCCACCGGCCCGCTTCTCGGCCTTCCCGACCCACTTCC                                             |
| 4933427E11Rik | NM_025756 | TGCGGACCCCGTCCCGCCGCTACCGGCCGAAACGCCAGCCACGCAGCTCTCCACCGGCCCGCTTCTCGGCCTTCCCGACCCACTTCC                                             |

|               |              |                                                                                                                                    |
|---------------|--------------|------------------------------------------------------------------------------------------------------------------------------------|
| Aaas          | NM_153416    | CGGGTTTCGGGACGGACTTCCGGGACTTCTGGCGCGCCCCCTTGCCTACGGAGCGGGCACGACGCTGACACGTCCGAGGACCGACCTGTGGCGTAAGGA                                |
| Chrd          | NM_009893    | CCCTTTCCTGCTCTGTCTGCTCCTCCCATTCTGGGAAGGCTCCACTCTTCTTGACAAAGGTCAGTGCCTGTA                                                           |
| Prodh         | NM_011172    | TGGGTTAGCCACGCCCTGGGGCCACGCCCCGATCACGCCCATTCGCGGAAGCCCCACCT                                                                        |
| Liph          | NM_153404    | GAACCTGCCCTGGAATGTGCCGCTCCTGCTGGGTCAAGTGTACCCACCTGATAAGTATTGTTGA                                                                   |
| Bcl6          | NM_009744    | GAACCCAGTTCTAAGAATCAACAGAGCTCAATTCTCGGAATTTGAGCTGCGGGCTTTACCATTGC                                                                  |
| 5730409G15Rik | NM_027446    | AGGCGGACCGGGCCGGGTTGGGCTGACTGGGGAGCGTTTTTAAACAGTTCCTGGAGCTGGAGCTGGCAACTTGGAGGCGAAGCCT                                              |
| Lpp           | NM_178665    | TGCCTAGCTCTAACTTGGGTCTAAGCTCACAGTTAGAGGCCGGGTCGTGCCTGGAGGCGGAAA                                                                    |
| Coro7         | NM_030205    | AAGATGTAATTTTCAGGGTCAAGGGAGGGCATCCACACGGGGTATACCGGAATCTGATACTG                                                                     |
| Dnaja3        | NM_023646    | AAGATGTAATTTTCAGGGTCAAGGGAGGGCATCCACACGGGGTATACCGGAATCTGATACTG                                                                     |
| Fytd1         | NM_027226    | CAGGGCCAGGCTAGTCGTTTCAGACTCGGTTTCGGAGGCGCTGCCAATGGTGTGGACCGTCGA                                                                    |
| Rrn3          | NM_001039521 | TGGTGAAGACTGTGGGCCCCAGAGTGTCTTGAATAAAAAGTTCTCTTGGGTTTGCATCAAGACCATTCTTATGAGTGATTGGGGTGTGCCTCTCCTGAGT<br>CAGAACGT                   |
| Pros1         | NM_011173    | CCCTCCCCACCCACCCCGCCCCAGCTGCGAAGAGCTTCCAGGAAATGTCCCAGTACCGCTTCCCTCCCGGGCTGGGGCTGGGAG                                               |
| Ube2l3        | NM_009456    | GGTAGGCCAGGCGGCTAGAACCCCTCACTTCTGAGCGGGGAGGGGCTAACCGGGAA                                                                           |
| Eif2b5        | NM_172265    | ACCTCCAGTAGCACCTACTGCGGTACGCCACGCCCTGGTCTTGCACGGGGTGGGTGGGGT                                                                       |
| Trap1         | NM_026508    | TGCCTGTGCGAGAACGGGAACGCAGCAAACCGCAGCGGGGGCCCTGAAGACTGTACTTTTTGA                                                                    |
| Dnajb11       | NM_026400    | CACGTACTTTGACACCTCCTGGGGTTGCACTTCGGTGAGCGCTCGCAAGTCACGTGTGCACA                                                                     |
| Ifitm7        | NM_028968    | CCCCACATACAGAAATGGGGGAGTGTCTGTGTGCTCTTTCAGCCTTGAGGTTGAGAGCATAGCTGA                                                                 |
| Morc1         | NM_010816    | ATCTCCATGAGAAGGCCACATAGCAGGCTGAGCTTACGCGCTGAGAACACCAGGGGGCGAAGGCGTCTGTTGAGCTCCCACTCTGCAAGTGAGCCAGGCCGT<br>ACGCGTGGACGTAGGCGTGGGCGT |
| Tfg           | NM_019678    | GCCCCGCTTCTCACTGGATGACCGAGTGTAGGAAGTGCAGCCGAGGCGGACACGCATG                                                                         |
| Pou5f1        | NM_013633    | CCTCCCCCAGGGAGGTTGAGAGTCTGGGCAGACGGCAGATGCATAACAAAGGTGCATG                                                                         |
| E130307M08Rik | NM_026530    | CCCAGGGCCTTGGGCGCCTAGTAACACCGCCCCTTCCCGCTCGCTGATTACACGTGAACGC                                                                      |
| AW049765      | NM_145934    | CCCAGGGCCTTGGGCGCCTAGTAACACCGCCCCTTCCCGCTCGCTGATTACACGTGAACGC                                                                      |

|               |              |                                                                                                                 |
|---------------|--------------|-----------------------------------------------------------------------------------------------------------------|
| Zfp13         | NM_011747    | GGAAGCCCCTTTATCCCCTTACCTGAAAGGGATGGGTCAGGCAGGGAACCTCCTGTTCCATTCCCGG                                             |
| Zfp206        | NM_001033425 | GGAAGCCCCTTTATCCCCTTACCTGAAAGGGATGGGTCAGGCAGGGAACCTCCTGTTCCATTCCCGG                                             |
| Ly6g6d        | NM_033478    | CCTCTAGGGCAGGGGAGGGTTCAGAGTGTGACCTTGAGAGGCTCTGACGGGAAACAGACAAAACAAA                                             |
| Ly6g6e        | NM_027366    | CCTCTAGGGCAGGGGAGGGTTCAGAGTGTGACCTTGAGAGGCTCTGACGGGAAACAGACAAAACAAA                                             |
| Stk38         | NM_134115    | TTTTTCTTTGAAATAATTATAGACTCGCCAGAAGTTACAAAACGAAAACCTGGAAGTCCGTAAAAGCCAACACCCACCCA                                |
| Lama1         | NM_008480    | GACAATAGAGACTCTGATATATCTGGGAAAGCATTCTCTAAGAGTTACTGTCAAAGACAAGGTCTAAATG                                          |
| Tmem8         | NM_021793    | ACTGTGTGCTGACTACTAGGCCAACACAATACAGTACGTTTTTGCATTGCTGTCCCTAATTTCTGGAAGGGTTC                                      |
| LOC547127     | NM_001045538 | TCTTGGTGTCTTGCGCACAGGCGTGCTCACACAGACTGTCTGACCCCATCCCCACCCC                                                      |
| Pde9a         | NM_008804    | GAATGCACAGGCTGCTTGGGGAAGGAACTTTCCCACTTCCGATCAAATTAAGTGAGGGTGGCCTTT                                              |
| Pim1          | NM_008842    | CCCGCCACACCAACGCCCTTCCATTTCTCACAACCTTGCTACGCTCCAGCTCCAATCTCGACCCCCCTCCACAACCCAAATCTCCGGGAAACACAGAGCCGGCA<br>GAG |
| Stk19         | NM_019442    | GCCAGGAGCCGTCTCTTGCGATTATAACCCGGATTTTCAGGATTCCGGGAAAGGAGTCCCGAAGACCG                                            |
| Dom3z         | NM_033613    | GCCAGGAGCCGTCTCTTGCGATTATAACCCGGATTTTCAGGATTCCGGGAAAGGAGTCCCGAAGACCG                                            |
| Flot1         | NM_008027    | GGCATCCCCCTGGGCTGCCGAGAAGTGTAGTGCTGCGGACCCGAGCGGAGCCTGCCGGGAAAGGGGCGGACCGAGGG                                   |
| Nrtn          | NM_008738    | GCCCCTGCCACACCTGGTTGCCGAGAAACCAGGGTTGAGGCTCCTCCCTCTTTGACATCCTTTGCCAAATCTTCAGCTCC                                |
| 6330416L07Rik | NM_176962    | TGGAGCTCCGGGCGACACTATCTCCCTCAGGAGACAGAGGTGTCAACCATGAGGCTCAGAAG                                                  |
| Pknx1         | NM_016670    | CATCCTGGGAACCCCTCCATACCTTCCCTTTCTCCTCATGTTCTATCCTGTGCTGCCTCTGGTGTCTCTCCTACT                                     |
| Pou5f1        | NM_013633    | ACACCGGAGTCCCTGGAGGAAGGAAAGCAGGGTATCTCCATCTGAGGCTCTGTCTTTGAG                                                    |
| Riok2         | NM_025934    | TCCTCCTAACCCGTCCTGGGATCAGCGTCCCAGGCCAGCGGGGCAGCTCCTAACCCGGCCCTCCTCCGCCGACAGGGGTGG                               |
| BC049807      | NM_001002008 | AGAACCGGAGCCAGGCGGCCCTGGAACCGCCCAGGTCAGAGGAGCTGTGGGGTTGAAAAGGGCGGGAAGGGAACAGGGTGTGATCGGTTTG                     |
| Hcfc1r1       | NM_181821    | GTGGTAGGAATCAGGGTTGAGGGTACCTGAAGATGGCAATCTGCCCGTAATTGTTGCCAGCTGCCAGAAACTTCCCGCAGGGGGAGACT                       |
| Rps10         | NM_025963    | TCTGCTCTCCTTTGTGACCTTTGCCGGCTCCATCTGAATCTTTCCCGACAACCTGTGCTCCCCAACCCACGCTTGGCTTCATCTCAGT                        |

|               |              |                                                                                                                                                                |
|---------------|--------------|----------------------------------------------------------------------------------------------------------------------------------------------------------------|
| Cdkn1a        | NM_007669    | TCAGTGCAGGGTGGTGGAGACCTGATGATACCCAACCTACCAGCTGTGGGGTGAGGAGGAGC                                                                                                 |
| Rab5a         | NM_025887    | CTGAAGTGGTGTGAGAGGCCTGTGAGTGAACCATCAGACCGAAAATCGCCGCAATGGGAAG                                                                                                  |
| Zfp13         | NM_011747    | CAGTGCAGCAGCGCTCCTTGTGTGGTGTCTGCTCTGGGCTGCAGTTACTGGAATGGAAAGTTCTGCCTAAGGCTCTGGTCCCATCCCCCTATCGGAACTCCCCTG<br>TTTGGGGGGTTGG                                     |
| Pnpla1        | NM_001034885 | GGCAAGTCTATAGGGTATTTTCTTGATTAATGATTGATGGAAGAAGGCTCAGCCCACTGTGGGCGGTGCCATTCT                                                                                    |
| Rps28         | NM_016844    | TGAATGGCATGGACCCCAAGTTGGCTTGAAGGCTGTAAGGAAAGGAGTTGCACGGATTTACT                                                                                                 |
| H2-T24        | NM_008207    | GGTGGGGAAGTGATGAAGCTGGGAAGTCGAAACCGAAACTGTAGCACTTTTCTACTGCTG                                                                                                   |
| Calm2         | NM_007589    | CTTCCCCGACCCGCGGGGCGCCGGCCGCTCAGCTACGCACTCACCATGCTGCAAGGGCTACGGGTTTCCGAGACGCGACCAGACAACCGCTCGAC                                                                |
| 160002H07Rik  | NM_028056    | CATTTTTGCCGCCCAAGGAGTCCCGCCTTCCGGCAGAAGGCCGCCCACTTCCGGTAGGCTACCCAATCTTGAGCACAGCTTGC                                                                            |
| U2af1         | NM_024187    | CTTAGGCTGTGGACAGCCGCTCCGCGCTGCTCAGCACCGCTGTTTCCCGCTCCCGCGCTGGGACCGCGCCCTCTCCCCTTGCTG                                                                           |
| Pou5f1        | NM_013633    | GGGCAGGCATTATAGGTGTGGCATTCCGCATCTGGCTTCCCAGGATACCTTTTCATGCTGGTGGACCATCTCTGGCTGGGGACGTG                                                                         |
| Tubb5         | NM_011655    | CTTGGAATGACTTCTATGATAGAGCCCTTCTAGCCGCCCGGTAAGTGGCGCCAGACTCTCTGGTAGGCGTTTGGAAATCTGCGCGGGAAGTAGTCCGTGGATG<br>ACGTAGCGACGGAGG                                     |
| Gna-rs1       | NM_008136    | TTAGGGTCCATCCCTTCTCCAGGGCTTAAAACATGAATCAGGGCCCAATTTCTCCTCACCTGACTTGGGATCACCAGGCTTCCCGTTAGCCATGGGGGGAGGGC<br>CCAGAAGGCTGGGTGGTCCTAAGAGCAGACGTGAGAAAACAGCCATCAGA |
| 2410137M14Rik | NM_029747    | GAGGTGCCTGTTTAAACATAACAAAAGTGGAGTGGCCTCCAGATTCTTCTGTCTTGGTACCTACCCTCAACAGGGTATGGCTGAAGTA                                                                       |
| Spats1        | NM_027649    | GGGTTTGAATGTCCTGCCACTCCTCCTCCTGACTCAGGGCTCCCGAAAGTACTCGCCCCGCCCGTCTTGGGTCTCCTTCCACCTCTGAGTCCCACCT<br>AC                                                        |
| Spats1        | NM_027649    | CTTCCAGCCGCTTGCATGGCACTCATTGTCTTCAAAGCTCTAGGGAAGTCTAAATGATCTTGCCCTGATCGGAAGAGGAACACTTTCCTGGCA                                                                  |
| E130307M08Rik | NM_026530    | TGAGGTCTGCCCTGACCACGCCCCAGGCCCCCACTAAGAACGGTCTTGAGAGGGCCTGGGCGCCTGGCTTGTGGTGGTAG                                                                               |
| AW049765      | NM_145934    | TGAGGTCTGCCCTGACCACGCCCCAGGCCCCCACTAAGAACGGTCTTGAGAGGGCCTGGGCGCCTGGCTTGTGGTGGTAG                                                                               |
| Fbxo15        | NM_015798    | GCTAAAATGGCACGCAGCCACCGCCCTTAGTTCAGATGTGCTTTATCATAACAATGGAATTCC                                                                                                |

|               |              |                                                                                                                                                 |
|---------------|--------------|-------------------------------------------------------------------------------------------------------------------------------------------------|
| Eif1a         | NM_010120    | GGGCCAGTGCCGGGAAGTCGACGGAAAGGGGCGTGGCCGGCCGTTGCCTAGGAAGGGCGCGT                                                                                  |
| Osbp11a       | NM_207530    | CTGTCCGCCTCCGCCGTGGGGCGGAGCCTCTCCCTCCTTTCTCGGAAAGCAGCAGCGGACTAG                                                                                 |
| Wdr55         | NM_026464    | GTCTTAGAGGAAGCTGCACGCTGCGCTCGCTTAATTCGCATCAGCTGCGGCAGGCCCGCCTTCTGAAATCCTCCCAGTGCACCTCCG                                                         |
| Tcf4          | NM_013685    | GGAACGGGGCGCCAAGCGCGCTCCGAGAGCCACGACCTGAGTGAGTCCCACCCGCCGGCGGGACCGCCCTGG                                                                        |
| Ccdc68        | NM_201362    | GAGGCTAAAACTTCCAGGCAGTGGAGAGCCAGAGGCTCCTCCCCGAGGTCGGGGACACTGGACTCTGGCCTGGGGC                                                                    |
| Slc6a7        | NM_201353    | CTGCCGTGAGGCCGCTGCGGGCGTGGGGTGCTACGAACGCCCTGCCTCTCCCTGCGCAGCGCCCTAGG                                                                            |
| Lman1         | NM_027400    | GGGGCGTGGACGGGGTCAAGGACGGATACTCGGTATAGTAGAGGTGCGGTGTGTCCAGCTCTGTAGTGCCTTTGGGGGAAGGTGATTAC                                                       |
| 5133400G04Rik | NM_029485    | CATCACTGTGGACAGCTCCACAGCTCCTGTGATAGCTGTAGGCTGAGGAGATAACCATAGTGCCAC                                                                              |
| 5133400G04Rik | NM_027733    | CATCACTGTGGACAGCTCCACAGCTCCTGTGATAGCTGTAGGCTGAGGAGATAACCATAGTGCCAC                                                                              |
| Cxxc1         | NM_028868    | CTGCGTCGCAACGTCGAAGCAAATGCGGCCATATTGCCCTCTGCGGGCCACCGTACGGAC                                                                                    |
| Pura          | NM_008989    | CAC TTCCTGTCAATGTTCTCGGACAAAAGCCTGCTCATCTAGCCTCTCTGCTTTATGCTAATTTCTCCCCTCAATCCCCTCTCGGCGGGCGTCTCAAGGCCAAG<br>GTGAGACCCTCCCCGGAGATGAAAGGCTCGCTGC |
| Napg          | NM_028017    | AGCCCCGCCCTCTCCGCGCATTCATTCCACCCATTTCCGGGACAGCTTTGCCACAGGAAGTTTGAGTCCTTCGCTTCCCGTAGTCCCCTT                                                      |
| Smad7         | NM_001042660 | CGGGCGAGCTCTGCTGGTCTAAATCGGGCCACTAACC GGCTCATTCGCTCCAAACTCGCCCCG                                                                                |
| Ier3ip1       | NM_025409    | CCTAGCTGAGCGTCCGGTGCGTGAGAGACTGTGTGAGGGGAATGAGGCAGAGAAGGATAGAAGACACCG                                                                           |
| Ccdc5         | NM_146089    | AGGTAGGCAGGAGGAGACTCTGATTCCACACTGGATTGGAGTGTAGGCACAGGAGACATCA                                                                                   |
| Atp5a1        | NM_007505    | AGGTAGGCAGGAGGAGACTCTGATTCCACACTGGATTGGAGTGTAGGCACAGGAGACATCA                                                                                   |
| Tut1          | NM_197993    | GAGCTGGA ACTCTCAATCCTACGAACGAGGTTTCTGGAGGAATATGGCAGCAAAGGACACGA                                                                                 |
| Dak           | NM_145496    | CTGCCTGCGTACCGGTACTCTCGCTCTCATCCGGTACTGCGACCTCTGGCGGTTAGGAG                                                                                     |
| Ddb1          | NM_015735    | CTGCCTGCGTACCGGTACTCTCGCTCTCATCCGGTACTGCGACCTCTGGCGGTTAGGAG                                                                                     |
| Rab3il1       | NM_144538    | CTTTGCTCACATTGTCTGGGGCCTGCTTGCTCAAGGTCATCCTGTGGAGCGCCTGCAAAAAG                                                                                  |
| Hells         | NM_008234    | CTCCCCAGCTACTGCTGGCCTCCTCTTCCAGTAGAGATTTAAATAATAATGAAAGACTTC                                                                                    |



|               |              |                                                                                                                                                                                                                                |
|---------------|--------------|--------------------------------------------------------------------------------------------------------------------------------------------------------------------------------------------------------------------------------|
| Lgals12       | NM_019516    | GATCTGGGTCCCCAAGGCTAGTGGTGCCCTTCCCCACCCACATCAGCCCTGCTGGGAAATGAGGGAGGAGGGTGC ACT                                                                                                                                                |
| Hrasls5       | NM_025731    | GATCTGGGTCCCCAAGGCTAGTGGTGCCCTTCCCCACCCACATCAGCCCTGCTGGGAAATGAGGGAGGAGGGTGC ACT                                                                                                                                                |
| Klf9          | NM_010638    | CGGGAAAGGGCGAGGTGAGGATCTATCCCAATGTGAGGTCTGACACGTGATCCTCTACCCCCAGCGGGCCATCTGTTCTTTTCT                                                                                                                                           |
| Gldc          | NM_138595    | TGAGCCAAAGAAACCTTCCCTCCCTTAAGTCGCTTCTATCAGAGCTTCATCACAGCAAGGAGAAAAGAGACAGAGGCAGTGCATAACCTCGACCAGGAGTGGC<br>TCT                                                                                                                 |
| 1810055G02Rik | NM_028077    | CCTCTTCTCCCCGGCTTCTGGGAAAAGCCCTAGACACAGACATAGCCTACAAGTCCTGG                                                                                                                                                                    |
| Efemp2        | NM_021474    | AGATGGAAAGAGGTTGGGTAAGGGAAAAGTTAAGGAAGACCTGGTTATTGCCGCTAGCGGTCTGGGCCAGGCACG                                                                                                                                                    |
| Ppp2r5b       | NM_198168    | GATTAACAATTTGCATTTGGCTTAGGACCCCAGGAAAGCAGACCTGGCCTCTAGGTTCTCCAGCATCCCTCAGTTCCTTCTGGCATAACC                                                                                                                                     |
| 1810013C15Rik | NM_194348    | GATTAACAATTTGCATTTGGCTTAGGACCCCAGGAAAGCAGACCTGGCCTCTAGGTTCTCCAGCATCCCTCAGTTCCTTCTGGCATAACC<br>AGCGCACGCTACTTCCAGGAAGGCAAGAGGCCGAGCGTAACCCTTGAACCCAGACCTTCTACCTAACACTCCGCAAACAACGCGGTCTGCGGTGCAAGC<br>ACCAGGTTTGGACCAGAACACCCGA |
| Ubd1          | NM_145500    | ACGGCCCCTCCCCAGAGGGCGGGCCTGGGCCGGGGCGCGGCTCCGGGAGGGGAAGTGA CTGCC                                                                                                                                                               |
| Mms19l        | NM_028152    | ACGGCCCCTCCCCAGAGGGCGGGCCTGGGCCGGGGCGCGGCTCCGGGAGGGGAAGTGA CTGCC                                                                                                                                                               |
| Ubd1          | NM_145500    | ACGGCCCCTCCCCAGAGGGCGGGCCTGGGCCGGGGCGCGGCTCCGGGAGGGGAAGTGA CTGCC                                                                                                                                                               |
| Gm962         | NM_001033448 | CCCCTCAACTGTAAACAGGGTTTAATAATCCTTTCTGGCTACCGAGAGCTGGGACACCAGACC                                                                                                                                                                |
| Nolc1         | NM_001039351 | TTGGAAATCTACAGTAGGAAGAAGCCCATTCAGCAAAGTAATGCGCGGGAATTTGCAAGTTTTCCCGCTCGGACAGGAGCGTGCC                                                                                                                                          |
| Nolc1         | NM_001039352 | TTGGAAATCTACAGTAGGAAGAAGCCCATTCAGCAAAGTAATGCGCGGGAATTTGCAAGTTTTCCCGCTCGGACAGGAGCGTGCC                                                                                                                                          |
| Nolc1         | NM_001039353 | TTGGAAATCTACAGTAGGAAGAAGCCCATTCAGCAAAGTAATGCGCGGGAATTTGCAAGTTTTCCCGCTCGGACAGGAGCGTGCC                                                                                                                                          |
| Nolc1         | NM_053086    | TTGGAAATCTACAGTAGGAAGAAGCCCATTCAGCAAAGTAATGCGCGGGAATTTGCAAGTTTTCCCGCTCGGACAGGAGCGTGCC                                                                                                                                          |
| Zdhhc6        | NM_001033573 | GCCGGGGCCCGGAACGCCGCCTGGGCACGCGGGGCTCGCTGGCGCGAGGCTGCTGTGGGTGGTGCTG                                                                                                                                                            |
| Zdhhc6        | NM_025883    | GCCGGGGCCCGGAACGCCGCCTGGGCACGCGGGGCTCGCTGGCGCGAGGCTGCTGTGGGTGGTGCTG                                                                                                                                                            |
| Vt1a          | NM_016862    | GCCGGGGCCCGGAACGCCGCCTGGGCACGCGGGGCTCGCTGGCGCGAGGCTGCTGTGGGTGGTGCTG                                                                                                                                                            |

|               |              |                                                                              |
|---------------|--------------|------------------------------------------------------------------------------|
| Ddx3x         | NM_010028    | CCTTCCCCTTTCCTCCCCGCCCTCCCGCAGTTTCCCGTCCCTCCCTCCCATTCCCAGCACTAGTCAAGCGAGTTTC |
| G530011O06Rik | NM_001039559 | GGTGTATTTTGTTCGACTCGGGTACACACTTTCCTGATAGGGACAAGACCTACCTTTAGAATG              |
| G530011O06Rik | NM_001039559 | GAATCTCCGAGGCAACTGTCAACTGACCTGTAATGAAAAGTACGCTCTACATGGAAGTCCACTCGAG          |

## Appendix2

The sequence from chip-clone results

- 1、  
GGTGGGGGGGAGTAGCTGCTGCCAGGTACGTCTCCCTCCAGAAACGACTCTGAGACCAGACAAAATTCGTGCGCTGCTCTCTTCAGGCAGTGGGGTG  
AGGACAGCACAAAGACTGAGAGGGTGCTTGGAGGGCGCCCACTCCCGGCTCTCCTTGGCCATAACCCCAACAAGCAGGGCTCCAGGCAGAGCACGGC  
AGTCCCCCTGGGATGAGAGGCAGAGACTGGAGTGAGGGGCTTAGGTGTGCATGTTGCTGGTGGGGAGTGCTTGGGACCTCTGCAAGCCTGTGGCTGA  
GGGTGAGGAGGTGCCGAGGCTCACCAGAGAGCAGTGACTATAGGCCCTGTGCTGTTATCCGTCCTGCATAACCAATCAACACCGATTTAGTAGCTT  
TAAAAACATGCATTTATTCTCAGTTTTGGGGGGTCAGGAGCCACACACAATTCCGCTGGGTGGCTCGGGGTTTCAAGAGTGCCACCAAGGTGTTGG  
TATTTCTTTCTGAAGCTTGAGGTCCTCTTTGAAGGGCACGTGGTTGTTGGCAGAATTCAGTTCCTTGTGGCTGTAGGACTGAGGTCCCTGCTTTCTTGT  
GGCTGGCAGCCTGGGGCCACTCACTGGTCCCTGATACGAGGCCCTCCCATGCCCCCAACACCAAACACACCCAAACAC
- 2  
TTGGTGGTGTCTAAGATTTGGGATTTACCAAGTACTGAGAATAGGACCTTCAAAAAATATGAAATGCCAAGAGGATCTGTTTTAAAGCAATGGAATTA  
TTTGAGAATTTGAAAAATACAGATTCTCAGGACCCAGTCTGAATGAGAATCTCTGGGGAAGAGGCCAAGGAAACAGAATTCAGGTAAGCACCTTGG  
CTGCTTCCAGTGGTTGGCCAATTTGGATATCCCTGTTGTGTCTAAATTATACCTAATTTGATTAAGTTTTGGTGGCTGGGAGGTTTGCTAGTTGAAAA  
ACACATACAGGAAAAAAAAAATGTACAGGGGAGTGTATTGCTTTGGTGTAGTCGTTTAAGAGTTGACAAAAACCCAAACACACCCAACACAAA
- 3  
CGTTTTTGGGTATTAGGGTTTAGCACAAAGATTATAAACTATAAACACAGCCTAAAATAAAAATGATTTTTTGTACAACCTTTTGATAAGTAAGACTAATT  
TAATATTGTTGGTTAATAAAAATAGCTGTATCTTCTGAGTTATTGACAAAATAACCATATATTTAAGGTTCTTAGGTGAACACCTGATATGCACAGGCTAT  
AAAAATGGTTAACAGAGAAATAACTGATGACTAGCTTTGTCTAATATCTCAGTTTTAATAAGTAATCTAGGTATAATTATTAATAAATAAATTTTGTAATGT  
AAATGGTATATGTGTTTATAAATAAGCTTTTTATGTAATTTAAAATATTAAGTTTTATGGTATGTAAATTAACAACAGATATTCATTAATGTCTGGTTC  
ATTTCCCAATTTTTCTTTTTTTTTTCGGAGACAGGGACCCCTCTCTGTCCGCCCAGGCTGGAGTGCAATGGCACAATCACACTCATAGCAGCTTCGACCTC  
TCAGGCTCAAACAATCCTCCTGCCTCAGCCACCCATGTAAGTAAACCAAAAAACACACACCAAACACACCAACACAAA
- 4  
GTGTTGTTTAAATCATATTCATCAGACATTAATGAAAAACACAGCATGTTCCCTACTTAAAACCCATTATATATTGTATAGTTTATTTATATATTAATAAAGG  
GACTTTACATTTATATATCAGAAAGCTAATAATAACCATGCAAGGGATGATGACTAAAATGTTCTTAATAATCAAGATTTCTATTCTAATATAGAAACATAT

TTTTATAATGTTTATATGTTAGAACATACAACCCACACCAAACACACCCAACACAA

5  
GGTGTGGTTGGTTCACAGCTATTAATGATGTGTTCAAGATCATTCACTTTGTAAATATACTTGATTCCAAAATCAAGAGAACCTATGCCTTTAAACCAG  
AGCTTCTCAAACGTCTCCTTGAAAGCTTTCCATGTTGGAGAAGCACAGATGTCTATAGCTGAGGTTCTGCAGCTACAACCAAACACACCCAACACAA

6、  
TGTTGGTTTTGTACTGATGAGGGAGCTGGAAAAAGAGAATTTAAGCCTGAAAAGTGTGGAGGGGGCTTTAATGAGGGAGAGGAGGTACAACCTCTCAA  
TAGGAGGAAGAAGACTAGACGAGAGAATCTTACTTCTCTTGCGAGCTCACTTCTCATAGTCTCCTCAGGTTCTGAGAGGACTTAGGGTTGGGATCCAAAA  
CAACCCAAACACACCCAACACAA

7  
TTGGTTTTGGTTTTTTGGACATGAAGTCCTTGCCCACGCCTATGTCCTGAATGGTAATGCCTAGGTTTTCTTCTAGGGTTTTTGTGGTTTAATTAGATCCC  
ATTTGTCAATTTTGGCTTTTTGTTGCCATTGCTTTTTGGTGTTTTTGGACATGAAGTCCTTGCCCACACCCCCCAAACACACCCAACACAA

9  
GGGGGGCTTGGCAGGCAGATCACCTGAGGTCAGGAGTTCAAGACCAGCCTGGCCAACATGGTGAAACCCCGTCTCTACTAAAAATACAAAAATTA  
GCCAGGCATGGTGGCGCACGCCTGTAATCCCAGCTACTCGGGAGGCTGAGGCAGGAGAATCGTTTGAACCTGGGAGGCAGAGGTTGCAGTGAGCAG  
AGATTGCGCCATTGCACTCCAGCCTGGGTGACAGAGTGAAACTCCTTCTCAAAAAAAAAAAAAAAAAATTACAAAATATAAATGAAAGAAATCAGAGGAGA  
TCCAAATAAATAGAGAGACATATCATGTTTCATGGATTGGAAGACGACACGGTAAAAAGGAGTGGAGTGCAGTGGCTCATGCGTGTAATCCCAGCACTT  
TGGGAGGTCAAGGTGGGAGATGGCTTGAGGCCAGGAATTCAAGATCAGCCTGGGCAACATGGTGAAACCCTCTCTCTACCAAAAATACAAAAATTAG  
TCAGACGTGATGGTGTGCACCTATAGTCCCAACTAGTCAGGAGGCTGATGTAGGAGGATTGCTTGAGCCCAGGAGGAGATCAAGGCTGTAAGTGAGTT  
GTGATTGCACCAAACACACCCAACACAA

10  
GGGGGGTGGGGTACCAAAGATCACCGGAGATAAGGATTTCAACCCAGCCTGAAAGTGATGGAGATACCCAATCTCAACTCCTCTGGACTCAATTAAGA  
CATAGTGGTGGCGCGTGCTGGCTTCCCAGCTACTCGGGAGGCTGAGGGAGAGAATCGTTTGAACCTGGGAGGCAGAGGTTGCTCTGAGCTAAGATTG  
CGCCATTGCACTCCACCCTGTGTGACCGAATGAAACTCCTTCTCAAAAAAAAAAAAAAAAAATTACAAAATATAAATGAAAGAAATCACAGGAGATCCAAAT  
AAATAGAGAGACATATCATGTTTCATGGATTGGAAGACTACACGTTAAAAAGGAGTGGAGTGCAGTGGCTCATGCGTGTAATCCCAGCACTTTGGGAGG  
TCAAGGTGGGAGATGGCTTGAGGCCAGGAATTCAAGATCAGCCTGGGCAACATGGTGAAACCCTCTCTCTACCACAAATACAAAAATTAGTCAGACGT  
GATGGTGTGCACCTATAGTCCCAACTAGTCAGGAGGCTGATGTAGGAGGATTGCTTGAGCCCAGGAGGAGATCAAGGCTGTAAGTGAGTTGTGATTGC

ACCAAACACACCCAACACA

11  
GTTGGTTTGTAAATGTGCCAATTAGTACATAATTTGAATTTAATTGCTCTTCCTGATCATAGAATAGAGTAGACGGCTAGGCTTGATAAGGTTAGTAAAAAT  
AGGAGGCCTATTTTAAAATTAATTAGAGGGTCTGGTATAGGGATGGGGGTTTCAACACACCCCAACACACCCAACACAA

12  
TGGTGTGGTCATACCAGTTAAAACATGGGGGAGGCTGGGCGTGGTGTTCATGCCTGTAATCCCAGGACTTTGAGAGGCCAAGATGGCCAGATCATT  
TGAGGCCAAGAGTTGGAGACCAGCCTGGCCAACATTGCAAAACCCTAAAATACAAAAATTACTAAAAGTAAAAAATTAGCTGTGTGTTTGGTGTGTG  
TTGGCAGGATGGTCTCGATCTCCTGACCTCGTGATCTGCCCGCCTCAGCCTCCCAAAGTGCTTGGATTACAGGCATGAGCCACCATGTGTAGCCAGTAC  
TTCTTTTTTTATGGCCAAATAATATCCACTGTGTGGATATACCATACTTTATCCATTCATCATCATCAGGTAATGGATATGTTTTGATTCTCTGCCCTACTTT  
ATTTTTGAGACAGAGTATCACTCTGTTGCCAGATTGTACTACTGCAGCCTCCAAATCCTGGGTTCTCAGCCTCCTGAATAGTTGGGATTACAGATGTGA  
ACCAACCAACCAACACACCCAACACAA

13  
GTTGGTTTGTAAATGTGCCAATTAGTACATAATTTGAATTTAATTGCTCTTCCTGATCATAGAATAGAGTAGACGGCTAGGCTTGATAAGGTTAGTAAAAAT  
AGGAGGCCTATTTTAAAATTAATTAGAGGGTCTGGTATAGGGATGGGGGTTTCAACACACCCCAACACACCCAACACAA

14  
TTGGTGTGTTCCAATTAGGAAAAACGGGGAAAAAAGAAAAAATTGAAAACATTATCTTGGAGACCTGTAGCCAGAAAAATCAGAATTCAATCCAAA  
CTGTAGAAAACCCAACACACCCAACACAA

15  
TTTTTTTTTTTTTGTGAGACACAGACTCTTTTTTGTACCCAGGGTGGAGTACAGTGGCACAATCTCCGCTCAGTGCAACCTCCATGTGCCGGGCTCG  
TGCATGTGACGTGTCTCCCCCTCCAGAGTATGGGGGATTATCACCACCCCCCAACACCCCAACACATATCTCTAGAAGATCCCGGGGCACCGATC  
TCAAATTCAAAATCGTGGATATATGTGTTTCGTGTGAGAAAAGTGTTATCCTCTCACTATTCCACACAATATAAGACCCAGAAGCATAAAGTGTAACCGT  
GGGGTGCCTAAAGAGAGATCTAACTCACATTATGTGCGTTGCTCTCAGTGCCCTTTTTCTCTCGAAAAACCTGGCGTGCCCTCTGCTTTAGAGAATCG  
CACAACGCGCGGAGAGAGGCGGTGTGCATAGTGGGCTCTTCTCTCTCTCAGAGACTCTGTGCTCTCTCTTTCTGTGCCGAGAGCGATAT  
CATCTCTCTCAAGGGGGGATATAGGGATATCCACAAAATCGGGGTATAACACGAGAAAAACGTGAGAGCAAGGGGCCAACAAGGCCCAAGACCCAT  
AAAAACGCCGCTGCTCTCGCGTTTCTCTAGACGCTGCGCCCCTCAGAAGAATCTCACAATATCGACTCTCGACTGAGATGTGGAGAAACCCACAAG  
TATATAATATACGACGTTTTCCCTGTGAAATCTCTCTCGTGCGCTCTCGTGTCCACACTGTGCCGTTTCCAGCATAACAGTGCCCTCTCTCTTTTCGAAA

AGCGTGGCTCTCTCATATCTCACGCTGTAIGTATCACAGCTCTGTATATCTCGCGCTCTAAACGCTGGTGTGTGTGCGCACCCCCCGTTCCCCAAA  
CGCTGCGCCCTTCCGGAAAATAGCGTGAGAGTACACCGGGTGAGACACACTTATCCCTCTGGCAGCCACTGTGTACAGATAGAGAGCGGT

16

GGTTTGGGTTACTGTGTTCACTGTCGTATCCCAGTGCAAAGAACACAGAAGGCACTCAAGATATAGCTACTGAATGCATGAATGGTGTCTCACAACCCT  
GTGAGGCTGGCATTATTGACATCCCAGGTTACAGATGAGGAAACCAGGGCTCAAGGAGGTTAGGTGACTTGCCTAAGGCCTCACAGCCCTGGACACTC  
CCATCACACTGGCCTTCTGCTCCCCAAACACACCCAACACAA

17

TGGACACCGCCAAAGTCCGGCTGCAGGTAGAGGGCGAGGCGGGGATGGGGGTGCATCTCAGGGCAGAAAGGGGCACCTGTGGGGGACACCCCTTTG  
ATTGAGGCTTTGGTTTAAACCGCCGTTTCTCAGGTAGGTACAGCAGGTGGCCGCCTGAAACACCAGTTTGACGTTGTCGCGGAACTGGATGCATTAGGG  
TGGGAAGCTGGAACTTTTCCAGGGTTAACTGCAAAATCTCAAGGACCGCGGGGATATGAATTGACCATGATTATTGTCAGACTCCAAAAGTTAGGGGG  
CACCCAGTGTTCTCAGAGCAAAGACCGTCAGCCCCTCTGGAGCTGACCAGCCAAGCTCTGTCTCCTTCCATCTTTGATTCAATGGAGGGGAGGGGGGT  
GAATCTTCCCCTCTTGTAACCGTTCTGTGAATTTATGGATCTGATGGATGGAATTTTATGAAGATCCGTCGGAAATCCGAAGATAAGGCGCGCAGTCGGAT  
TTTGCTCAAGATTGTTCTAGGATGGGGCCTAATTTTGTAACCTTACCTCCCGTGGATGAAGGAACTGTTTCTGATACCGGTAGATAATTTGTAGCCAGAT  
CCATCGAGCACGTAAACACCGGCTACCAAAAAACTTGATAGATAACAACCTTGTCTGGGGGTTAACGTGAACCGATCGTATATGGATAGAATTCGAAAT  
ATGTATAGATAATTGATACTTTGAATCTTCCACCATATCTGGGGATTTTCAAGAAGGAACAACCTTCTTACATCCTGTGCGTCAATCCAGGTCTTCCATC  
ACGACGTGATCTGGCTGTCTTTATAGCGAATGTTTAAACGATACGCCCTATGCTTAGCCTGTCCTTGCGAAGTTAAGCAGTTTTAGACGAGAGATGATATT  
AGCAGGTTCCGAT

18

GTTTGGTGTGCTCCTTGAAATGTCTTACCCCTACACCTTGCTTCTAAAGGTCTATCCCTTCCCTGAAGCCTGCCTAATCTATTCTAGATAGAGCATCCT  
CACCCCTCTCAAACATGTCTGAACACACACCCCCACCAAACCCACCCCTACACAA

19、 TGGTGTGTTGAGCTGTGCCATTGAAAGAGTCTTGAACCTCAGGCCGGCCTGGAGGTGGAGGTGGAGCTGTGCCAAACACACCCAACACAA

20

GGGGTGGTGGGGACCCAGGAAGGCCTGAGGTGAGCTATTTACCAGCCAGCGAAGGACTACACTTGACCCTAGAAGGACAGGGGTTTGAATCGTGTGG  
TCCACTTATATGTGGAC

21

GGTTTGTGGGTGGGGACCACAACGCAAAAAGAAAGCAGGAATAGACTGGAAATAAATTAATCACCATGCGCTGTGCCCCCTTTTATGAAATGGGTTC

ATAACTAATAAAACCGGGCCGATCACCCCTCCCAATAGTTTCGCTTCAAGAAAGCATTATGGCGCGAGATGTAGTTTTAGCTAACATCTAGTCTGCTTCC  
AGTGTTCACCCATTGTGGTGTCTTCTCAGAGTCATCTGCTCGCCTATCTCAATTAAGCCAGGCCGCTGAGAGGCTTGCTACATCACAAATTTTAAAT  
TGAAAAACAAAGGTGTTTTTAAAGGTATACACATTTAAAGTTAATAACATAGGTGCCAAATTGGATTCAACCTCCACACCAGTTTTTCGAATACCCCC  
GGGACAACACGGCCTCCAGACACACCCATCATAATTCGTTAAAGGATTAATTTTTACCGTTCCTTAGACCTCACGTGGAAACATTCCGGTAACTTATCG  
GGATCCCCTGGTGGTTTTATTTCTGAGCACATTCGAATAAGTATCCTCTCCTGAGAAACCAGCTGTGACTAATGAAACCAACCAATTCCAATAAGAAGT  
GTATCATTCAACCCCTCCGAGTCGGGATAACTGGCGTGACTGCTGCATTTTGAATCCTCTAACTCGCTGCGAGAGGCCGTTTGCTGTAGCGAGCAC  
TTCAGTCTATCTTGGCTGACTACTGCGCTCCATCAATCTGGGTGCGAGAAGGAAGAACCTCTCACCAAGGTGCGACCACAGGATCCACACCCTTAA  
GGCCACCTTTCAAGATATCACCTGAGGCAAGGCCCCCTAAAGGCTTACACAAGAAAAGCCGCGTCGGAGGCGCAATCCCTATGCGCCAACCACTACA  
AGAGTTCTCAACAGTGACCTCAAAGTTAAGTGGGGAGACGCGCTGGGACTTAAGGATCCCTGGCTTCTTCTCGATAGATGCAACGAGGGCTTCTGT  
TTCTACCTGCAACGATCCGGATACC

22

GTTGTTTGGGGTATATCTTATCTGAAAAATTATTCCTGGAAAAGATTCTACTCTTAAATTATCTCCACGTTCAAGTCCACCACCATATTATAGGTGTTCCCTC  
ATTTATAAAAGATGGATGTCTAGTATTTTTATTGATTAGAATTAAGAAATCATTTTTATACATTTTAATTGTTTAAAGAACATATAAAATCAATGAAAAATA  
TATCCCAAGGAAGTGCTTCGAGACAGGCATGCCATGCCTATATAGACACAGAGAACTTAACTCTGTGTGATCCTAGAACACAAATTTTTATTGAGA  
ATCCTTTACAGTTTTTAAAGTTATACACATTTAAAGTTAATAATTTGTGCCAAATTAGCCTCTGCCTCCATTCAAGTTGCTATAATGAAATATTTGTAAC  
ACCACCACAAACACACCCAACACAA

23、

TGTGGGTGGTACACCTGAGGTCAGGAGTTCGAGACCAGCCTGGTCAATATGGTGAAACCCTATCTCTACCAAAAATACAAAAATTAGCCGGATGTGGT  
GGTGCATCTGTAGTCCCAGCTACTCGGGAGGCTGAGGCACAAGAATCGCTCGAACCCAGGAGGCAGAAGTTGCAGCTAGCCGAGATCACACCAGCCT  
GGGTGACAGAGCAAGACTCCATCTCAAAAAATAAATTTAAAAACAACAAAACCAACACACCCAACACAA

24

TGTTGGTTTTGTACTGATGAGGGAGCTGGAAAAAGAGAATTTAAGCCTGAAAAGTGTGGAGGGGGCTTTAATGAGGGAGAGGAGGTACAACCTCTCAA  
TAGGAGGAAGAAGACTAGACGAGAGAATCTTACTTCTTTCGAGCTCACTTCTCATAGTCTCCTCAGGTTCTGAGAGGACTTAGGGTTGGGATCCAAAA  
CAACCCAAACACACCCAACACAA

25

GTACAGAAACAGTGAGATTGATTACAGCTCAGCATTTCCTTATTTGAATGGAGTTTGAAGATTCAGCAGTCAATGAGTGGTTAAATTATGGCTGCTGG

GATTGGCCAACACTCAGCTATTATTACAGACGCATACTACTAAGTTAGGTTTTTGTCTGACTATTAAACTAGGTTACAGTTCATCCAAAAGGACTCAAAT  
ATAGAAGTACAGAGTCCTTCTCAGACCATATTTAGTTTGCTTTAACAACATAAATGGATTTACCCAAAAGATTGACAGTAACTAAATCTGGGCAGTAAG  
ATACTGAGTAACTTGAAATTAGCTTTTTTTCTCTTTTTGCTTTTCCATATTTTCCAATTTTTCTGCAAAGAATGTGGATTGCTTATAAAACAAACACACAC  
AAATAGTTAAGAATTTAAAATAAGAAAATTTAAAAGTAAAATTAGCTATCATTCAATTTGAATACCAACCCACCCCAAACACACCCCAACACAA

26

GTTGGGGTTTTGAAGCTGTTGACCTTTAGATGGGGTTTTTGTGGGGACTTTTTTGTGATGTTTTTGTGTTGCTTGCTGTTGCATTCCCCTTGCCCTGT  
GTGGCTCCAAGATGGGCTGTTGCACCACCCTGTCTTTCTCACTCTCCATGGGTCATGACAAGTGCCCACTCAGCCCCAAAGAGAGAGCCTGGATACT  
TCAGTTGCCAGTGCAGGATTCACCTTGCCATTTTTGTTATTCTCGGTGGGAGCCTCTGAGCACAGCTGTTTCTAGTCCAATTTACTTTTTAAAATTGACA  
AATAATAATTGCACAGATTTATGTGGTATGTAGTGATTTTTGATACATATAATGTTCAAGTGATCAGATCTGGGTAATCAGCACATCCATCATCTCAAACAA  
CAAACCAAACACACCCCAACACAA

27

GTTGGGGGGGACTACCAAATGATTCACCCCTACACCTGGCTGGAGACTTTCTTGATCTTGTTTTTGTGTTGCTTGCTGCTGCTTTATCCAGCAGATTCA  
CCCTTACTAGATGGGAAGGTTGCACCCCCCGTCAACGTCCTCTCCATGGATCTGACAGATGCCCACTTCCCCAACGAAAGAGCATCATACTTCTGTT  
TCCAGCGGTGATTCACCTGGCCATTTTTGTAACCTTTTTGGGAGCCTTTGACCAAAGGCGTTTTCTTTCCAACCTTTTAGTCTTTAAAGTTGAATGTAATA  
ATTGTCAGAACAAGGTTGATGTCCTGATGTTTTGTTCAAATACTGTTACGCGACCAGATCTAGGTAATCAGCCATCCATGGGCTCAAACAACATACGC  
GGATCGAGCTCACATTTCTGGTAGAGGATCCCCGATCCACCGAGCTCGAATGCCTAATCATGGACATAGCTGTTACCTGCCGAAATTGAAAAGCGATAA  
CACTTCCAAACAACATGATAGTCGGATTCATCAATAGTAAACCCTGCGGTGACTAATGTGAGAAATAACTAACATTAATTGAGTTGCGGGCAATGCCCA  
CATTACCTCAGGATACCTGGCGTGTGAGCTT

28

GTGGTGGGGACCCAGGAAGGGCTGAGGTGAGCTATTTACCAGCCAGCGGAGGACTACACTTGACCCTTGTAGGACAGGGGTTTGAATAGTGGGGTCA  
AATTTTATGAGGACTTTCTCCTGCCTGTGCCACTCC

29

GTGTCCTAAGATTTGGGATTTACCAAGTACTGAGAATAGGACCTTCAAAAAATATGAAATGCCAAGAGGATCTGTTTTAAAGCAATGGAATTATTTGAG  
AATTTGAAAATAACAGATTCTCAGGACCCAGTCTGAATGAGAATCTCTGGGGAAGAGGCCAAGGAAACAGAATTCAGGTAAGCACCTTGGCTGCTTC  
CAGTGGTTGGCCAATTTGGATATCCCTGTTGTGTCCTAAATTATACCTAATTTGATTAAAGTTTTGGTGGCTGGGAGGTTTGCTAGTTGAAAACACATA  
CAGGAAAAAAAAAATGTACAGGGGAGTGATTGCTTTGGTGTAGTCGTTAAGAGTTGACAAAAACCCAAACACACCCCAACACAA



30

GTGGCGGTGACTAGCTGCCCGAAGCCACTCCCACAATTCAGTCTGCTCCTGCTGAGAGTCTCACATCTCCTGGTGCCTCCTGCTCAGGAGCATCGGTC  
TCACCCTCCGAAGCAGAGCCCCTTTGCCTCATGAAGCGTTTTCAAACAGCCTACTCACAAGAATCAAGGAACGCCCGAAGCCCAGTTCCAGGGCCCT  
GCCCAGGCCTGAGGAATCTAATGACAATGCCATAGTGAAGGATCCTGGCCTGGTTAAGGTCACAAGGACACGGGGGTAGGGGAGTAGCTGAGGTTG  
GGAAGAAGTGTTAGGAGTTGGTCTGCAGCACACTTCAAAGTCACGTCTTCCCATCTCGAGCCTTCCATCATCAGGTTAAATTAAACTCTGGAGCTGGG  
GTGGAGGGAGGCCTGAGCCCAACCAAGCCCAGCTGAATGGTTTGAGAGATCTGAATCAGCCGGAAGCAACTGCTCTTGTCCCCAGAAGCCGTGTCT  
CAGTTCCACCTGGCATCGCCAATTATCTGTGCCTCCGACATAGGGTGTTTTTTATTCCCTCGAAATAGAGCTATAATTAATCCAAAATTGTCTGGAGAC  
TTGATAGTCATGGCAAAGCAGAACACAGTGTCTGCAGACAAAAACCTCTTTCAATAAAGATTAATTATTCGCAGCCCCTGTCCCAGGCCTGGACCA  
TGTGGGGAATGAATATGAAGGGGAGGGAGTACCCAGCTCAGAGGAACTGGAGGGGCTCCTTCCCTCCCCCACAGTGCAGCCCCCATCTTCTCTCA  
GAGACTAATCGTCGACCTGCAGGCATGCAAGCTTGGCGTAATCATGGTCATAGCTGTTTCCTGTGTGAAATTGTTATCCGCTCACGATTCCACACAACAT  
ACGAGCCGGAAGCATAAGTGTAAAGCCTGGGGTGCCTAATGAGTGAGCTAACTCACATTAGTTGCGTTGCG

31

TGTGTGTGCATGTGTCTTTATAGCAGCATGATTTATAATCCTTTGGGTATATACCTAGTAATGGGATGGCTGGGTCAAACGGTATTTCTAGTTCTAGATCCT  
TGAGGAATCGCCCACTGACTTCCACAATGGTTGAACTAGTTTACAGTCCCAAAAACAAACCAACACACCCAACACAA

32、

GGGGTTTCGCCATGTTGCCAGGCTGGTCTCCAACCTCCTGACCTCAGGTGATCCACCCACCTCAGCCTCCCAAACCTGCTGGGATTACAGGTGTGAGCC  
ACCATGCCCAGCCTGGTGTCTTATTTTAAACAAAGGAAATTTGGATATGCTGAGGCACCCTAAGGATGTGCACACGCAGCGTGAATGCCGTGTGAAAAT  
CCAGCAAGAAGGCAGTTGTCTGCAAGCCAAGGAGAGAGTCTTAGGATAAACCAGACCTGCCAACGCCTTGATCTGTGACGAAAAGCCTCTAGAGCT  
GTGAGAAAATAAAGTTATGTTTAAACTACCCAGCTGTGGTAATCTGTTACAGCAGTACCAGCAAATAACAGGAAATGTCCCCATGAGCCCCACCA  
AACACACCCAACACA

33

GGTGTGTGTGCATGTGTCTTTATAGCAACTTGATTTATAATCCTTTGGGTATATACCTAGTAATGGGATGGCTGGGTCAAACGGTATTTCTAGTTCTAGATC  
CTTGAGGAATCGCCCACTGACTTCCACAATGGTTGAACTAGTTTACAGTCCCAAAAACAAACCAACACGCCCCAACAC

34

TTTTGTTTTTTTCACTGGTCAGAACCAGTGTGGTAGTAAGAATTATTGTCCCAGAAGAGAATGGAAATGCTTGCCAACCTCTACTTTCAACCCTTGCTGG  
AATCCCTATGTTGTGGGTAGAGATATGACTAAATTAAGCAGTTTTAAGTCTAGGACACCAAACCCCAAACACACCCAACACAA

35 GGTAAGGTGTGTCATGATGGTTTGCGGCACAGATCATCCTATCACCCAGTTATTAAGTCCAGTATTCATTAGTTTTTCTTTCTGATACTCTCTCTCCCC  
ACAACCAAACACACCCAACACAA

36 TGGTGGTTGTACTAAAAATAAGATGGGGTAGCAGGTGCTACATTTACTACCCTTTCTGAAACAACCAAACCTGGCTGAAATATATAAAATACTTTTCAAGG  
TACTGGAACCTAGGTGATGTCTTAGTGCATTCAGGCTGCTATAACAAAACAAACCAAACACACCCAACACAA

37 GTGTGGGTTGACACGAAAGGTAACAAGACCATCCGTGCGGACTGGCGCACGCCGTTTTCGGCATTTTTCAACGTGGCATATGCCGGAAGCTACGCACAC  
GCGCGGGATGCGAGATTGGGCGCTATTTGACGCAGCCACAAACGGCGGGACGACCTGCCCTGCGACAATCAGCTATCAAAGGACGCGGGCGCTAGC  
GGTTTTTCCGGGTGCTAGCGTATAACCGCACCAAACACACCCAACACAA

38 GGGGGGGTGACACGAACCGTAAAAGACCATCCGCGCGGACTGGCGCCCGCCACCTCGGTTTTTTCAACGGGGTTTATGCAGGAAGCTACCTACACT  
CGCGGGATGCGAGATTGGGCGCTATTTGACGCAGCCACAAACAGAAGGACGACCTGCCCTGCGACAATCAGCTATCAAAGGACGCGGGCGCTAGCG  
GGTTTTTCCGGGTGCTAGCGTATAACCGCACCAAACACACCCAACACAA

39 GTTTTGTTTGGTAAAGGTGTGTCATGATGGTTTGCGGCACAGATCATCCTATCACCCAGTTATTAAGTCCAGTATTCATTAGTTTTTCTTTCTGATACTCTC  
TCTCCCCACAACCAAACACACCCAACACAA

40 TGTTTGAGCATGTCCTTAGACACATGTTTACAGATATGCTTCGTTATTCCCTTTAAGCCTTTTCTTTACTTTCTCCTTCACTTTTGTTACTCTCAATGCTAATG  
AATAATTGACCTCTTCGCCACAAAAACCAAACACACCCAACACAA

41 TTTGGTTGCGGGTGCCTGCTACCCAGCTAGCTACCCAGTAGCGTGTAGTCCCAGCTACTCGGGAGGCTGAGGCAGGAGAATGACATGAACCCGGGAG  
GCGGAGCTTGAGGTGAGCCGAGATCGTGCCACTGCACTCCAGCCTGGGCGACAGAGCGAGACTCCGTCTCAAAAAAAAAAAAAAAAAAAAAAGAAAA  
AAGAACTGTTATTAACAGCTCTATACCAACAAATTGGATAACCTAGAGTAAATGGATAAATTCTTAGAAACAACCAAACCAAACACACCCAACACAA

42 TTTTTTTTCTGTAAGGCTACACAGAAGAATTCTCAGTAACTTCCTTGTGTTGTGTGATTCAACTCACAGAGTTGAACGATCCTTTACACAGAGCAGA

CTTGTAACACTCTTTTTGTGGAATTTGCAAGTGGAGATTTTCAGCCGCTTTGAAGTCAAAGGTAGAAAAGGAAATATCTTCCTATAAAAACTAGACAGAA  
TGATTCTCAGAAACCCACACCAAACACACCCAACACAA

43、

TGTGTTTTTTTTATGCCTTTGCTGATCTGGGTGACTCCCTGGTTGGCTCAAAAAACCTCAGCTCTTTTTCTAAGCGAAGCTCCGCCCCCTATAAACTTTC  
ACGCTTGACCCGAAAAGAAAAAGGCCTGGGGGTATTCCTTTTTCACAGCCAGTTTCACACTAGCTTTTTTTAGTTCCAACCAGCGACGCCTGGTATTTGTA  
CGGAATTTTTGTTCTTCTCTATTTCAGCGTGGTATGGACTTTATGCTGCGATGGCCATCAATCTTTGGATTTTCTTTTTAGTCGTACCTTTCCTTTTTTAGC  
CAATCTTCCTTGGGCAGGTGATACGAACCTATCTGCAACCCCAAACCAAACACACCCAACACA

44

GTGGGGTTTTCTCTGGCCCTAAAATTATAGGTACAATTGCATTAATCCCCACCCCCGAACCACAGCTTGAGGAAACCACAGCTCTGCTACAATTTTT

45、

GTTTTGGTGGGGCGTGTAGAAGTCCACCAGCTGTTGAAGATGAGGCCAGGCGTCCTCAGAGGAGAGAACAGAAAGTGCCAAGGCCAGGGGCAGCGG  
TAAGGAGCACACGGCACACTGGGGAAGAGTCAAATGCTGGAGCCCAGGGTGTGGGCGGAGCGGTGGGAGATGAGGACACCCCGATGGCTTGGGGTC  
AGGTTCTGAAGAATGTTGGTACTAGGCTCGAGTTTGGACTCTATGGTGGGGGAAATAGAGAGCCCCTGACAGTCTTTAAAGAGGGGAGAGATGGATC  
AGGCCTGTAGCATTTCCCTCAGGGAGGTTATAAAGCAGGTACAGAGGTACAGACACATCTTCTGTGCTTATTTATGTCATGGGGCCTTTCACATAGTTGG  
AGCCATGATTTACATAGCTGTGCTTCCCCATAACCACCACACCAAACACACCCAACACAA

46

GTGTGGTGGTTTTAAAACATATATTCATAAAAAAATAAGACTAAAGGCTTAAAAGATACCAATGCTCGAATTTTCACTAAGTGTGTTGATTTGTATTATCT  
AACATGGATTATTGTTTATTGTTTATTGGTATTTTTAAATGGAATGTAGGGTATTTTAATTGTAAATAATAATAGTTTACAATAAGTTGAAATTATAAGATTT  
ACAAAATTAATTATTGATTTAATAAATGGGCATAATTCGAATTTTACATAAAGGTGCTTTTTATTTGTTTAGAAAATCGACGAAATTAGTGCAAATACTTCA  
AAATAATCAAGCTTATGGACACAGAACTCAAGCCTCTTTCAATGATTTACAATGAAAAGTCAGGTTTTTCATGCCAATCAGAAAAGATGATATTTATGAAA  
AACTCATGACCATCTGGACCTCACATGGTTTTGAAATTCAGTTTTTGTATTTGGTTTCAGAGCCTGATATAAAAACCCTGATGCAAAAAATCTTTCAACG  
TCATGCACAATACTCAGATTGTGGTGTCAATTGTTGCTGCAGGTGGTATGGTACGTTGAATGCAGTCGCCTCGCAAATGTTAAAGCAAAAAATTCCTAT  
GGGAATACTACCTTTGGTACTTTTAATTATGTGGCGCGTGTCTACATATCCCTTTGAATATTTTAGAGGCAGCCAATGTGATTGCCACAGGGGAGCCG  
CGTGCCTCACATGTGGCCTGTATCAATGATCAAATTTATTTAAATAATGCCAGTTTAGGTTTTGTATCCTTTGTTTATTAAAAAACGCGAAGAATATAATCGT  
CGGTTTTGGACGCTTTTCTTTAAATGCGCATAACGTCAGGTTTAGATGTCCTGATTCGTGATCGTAAAGAACTCAAATTAGAGATTGAAGTAGATGGGCAA  
AAGTATCCTGTAAAAACACCAAACACACCCAACACAA

47  
GGTTTAGGGTTATACATTTGAGAGACAGAAGAAAGCAAACACTACTTCTTAACAAAATTGAACCTGTAACCTTTGACCTAGTAGTCTCAGGCTTTCACTGAA  
CTAAATGAGGCAGATTATAAACTGTGTATTGTTTAGTGGAGACTTTATGTTCTGTTAATACTCTGAATTTTAAATTGTTGTATAGATTATTATATCTAGTGTA  
CAAATTAATACCAAATTCGGTATTAATTCAAGTATAATTGTACTTTACAACTCTTAGCTTAAAAACAGTTTTTCATTATGTGACATGTCAGAAACAACCAA  
ACACACCCAACACAAA

48  
TTTTGTGTGTGAAAGCTCACTCTGGCTGCTGTGTCATGAACAGATTTTAGGATGCAGAGGTGGAATCAGGGAGCCCACTGAAGAAGATATTCATTGAA  
GGGGTCTGGGGAAGGATGATGGTGACTGGGACCAGGGTGAGGGAAGTGGAGATGATGCCGTGAAGTGCTCCAATTTGAGACAGTTCTAAGGAGCAAT  
TTACAGGACTCAGTGAATGCGTAGGGGAGGGAGAGGAAAGCATAAAGATGTCTAAAAGCATTCTCATCCAATTTAGATTATTAATAAAGGATATGGTG  
GAGAAAGCACTGAATGTGGAGATAGACGGGGGCCAAAACACACCAAACACACCCAACACAAA

49  
GTCTAAAAGAAATGAGGAAATGACAATGATGATGGCAGCAGCTAGCAACTGTACAGCTCAATAACACCATGAAATAGGTACTGCCACTATTCCTATCAT  
ACGGATGAGGAAACTGAGGCATAGAGTGGTCACACAGCTGGAAGATGGCCAAGCAAGGATTCAAACCCAGGCAGTCGGCCTCGAGAATTCACACCT  
CTAACCACTCAGGACAACGCCACTGTATCATGGCGCTCCACGATCAAAGGCCCGGAGGCTGAGAGTGCTTAGAACTGATAGAAGAAAAGTAAAGGC  
AGGAACAGACGGGCCTTATTACCCTTCATAGGCCTAGGAGTCTGAACCTCATCAGGCAATGTGGGGCCTGAAGAGGGTGACCAAAGGGACTTCTTGC  
AGGGTCCCCCCCCCAACCAAACACACCCAACACAAA

50  
TGGGGTTTGGAGCTAGAAATAAAATTTCCGATGTTACCCTGCAACCTCTGTATAGGGGTAAAAACCAACACAAACAGTCCCGCCCCTATTCCAATCAAA  
CGGATGAGGAAACTGACATTAATCTGGAAAGTTAATGGAAAAGCTTCCGCTTTTCTGAAATTGAGGCAATCGGCCTCGTGAATTTTTATTCTTACA  
ACTCTTGATGCGCCACTGTATCATGGGGGAAAAGATCAAGGTTTGGAGGCTGATAGTGCTTCTAACTGATCCCCAAAAGTGAAGGCTGAACAAACC  
GGCCTTATTACCCTTCATAGGCCTAGGAGTCTGAACCTCATCAGGCCATGTGGGGCCTGAAGAGGATGACCAAAGGGACTTCTTGCAGGGTCCCCCCC  
CCCAACCAAACACACCCAACAGA

51  
TTTTTTGTTGGAGGGCAAGGAGAGTAAAATAATACTATTTTGAATGTATTTTCTCTTCTTATGTGCCATTATCTCCTTTCCCTACTCATGGGAGTAAGAGA  
CATGTAGATAGAAGATTCACACCCACTGATTGTTGCAGCATGTCCTTTAGCTTTATGTTTTTCCCCCTCCATCAAACTTTTACCAAAGCAGTGTTTAGTT  
GTCTGATTGAGTTTTATATCTTTTCTTTTTTCTAGTTAAGCCAATGAAGATGCCAGTAAGAAGTCCCAAACACACCCAACACAAA

52

GTTTTTTGGTTTATATATAGAGATTCAAGTAATACTATTTTGAGAGTAATTTCTCTACATGAGTGGCTTTATCTCCATTCCGTCCTCATGGGAGTAGAAGAC  
AAGTAAAAAGAAGATTCACACCCGCTGATTGATACGCCATGTCCTTTAGCTTTAGGTTTTTCCCCCTCCGTCCAAATTTTTACCAAAGCAGTGTTTAGTT  
GTCTGATTGAGTTTTATATCTTTTCTTTTTTCTAATTTATCCAATGAACATGCCAATAAAAACTGCCAAACACACCCAACACA

53

GTTTTGTTGTCATAAAATTTAACTTCATTTAATCAAGGTGACAGGTAAATTCTTAAAATACCACCCAAACACCCCAAAAATCTCAGGCTTTTCGCAGTCC  
TAAATAATGAGCATTATTAACGTGTATTGTCTAGTCTAGACTTTGTGTGAAATTGTTACTCTGAATTTTAAATTGCTGTATACATTATTATATCTTGAGTAG  
TAATTCCTGCGGTGCCTAATATTAGATCTAGTATAATTGAATTTTACAAACTCTTATGTTAAAAACACTTTTCATTAACTGACATGTCCGACACAATCAA  
CACACCCAAAACAC

54

GGTTTAGGGTTATACATTTGAGAGACAGAAGAAAGCAAACACTACTTCTTAACAAAATTGAACCTGTAACCTTTGACCTAGTAGTCTCAGGCTTTCACTGAA  
CTAAATGAGGCAGATTATAAACTGTGTATTGTTTAGTGGAGACTTTATGTTCTGTTAATACTCTGAATTTTAAATTGTTGTATAGATTATTATATCTAGTGTA  
CAAATTAATACCAAATTCGTTAATTCAAGTATAATTGTACTTTACAAACTCTTAGCTTAAAAACAGTTTTTCATTATGTGACATGTCAGAAACAACCAA  
ACACACCCAACACAA

55

GCAGTGCCAGCTTGCATGCCTGCAGGTCGACGATTTGTGTTGGGTGTGTTTGGTGGACACCGCCAAAGTCCGGCTGCAGGTAGAGGGCGAGGCGGGG  
ATGGGGGTGCATCTCAGGGCAGAAAGGGGCACCTGTGGGGGACACCCCTTTGATTCAGGCTTTGGTTTAAACCGCCGTTTCTCAGGTAGGTACAGCAGG  
TGGCCGCCTGAAACACCAGTTTGACGTTGTCGCGGAACTGGATGCATTAGGGTGGGAAGCTGGAACTTTTCCAGGGTAACTGCAAATCTCAAGGA  
CCGCGGGGATATGAATTGACCATGATTATTGTCAGACTCCAAAAGTTAGGGGGCACCCAGTGTCTCAGAGCAAAGACCGTCAGCCCCCTCTGGAGCTG  
ACCAGCCAAGCTCTGTCTCCTTCCATCTTTGATTCAATGGAGGGGAGGGGGGTGAATCTTCCCCTCTGTACCGTTCTGTGAATTTATGGATCTGATGGA  
TGGAATTTTATGAAGATCCGTCGGAATCCGAAGATAAGGCGCGCAGTCGGATTTTGCTCAAGATTGTTCTAGGATGGGGCCTAATTTTGTAACTTACCT  
CCCGTGGATGAAGGAAGTGTCTGATACCGGTAGATAATTTGTAGCCAGATCCATCGAGCACGTAAACACCGGCTACCAAAAACTTGATAGATAAC  
AACTTGTCTGGGGTTAACGTGAACCGATCGTATATGGATAGAATTCGAAATATGTATAGATAATTGATACTTTGAATCTTCCACCATATCTGGGGATTTT  
CAAGAAGGAACAACCTTCTTACATCCTGTGCGTCAATCCAGGTCTTCCATCACGACGTGATCTGGCTGTCTTTATAGCGAATGTTTAAACGATACGCCCT  
ATGCTTAGCCTGTCCTTGCGAAGTTAAGCAGTTTTAGACGAGAGATGATATTAGCAGGTTCCGAT

56

TGTGGGTGGTACACCTGAGGTCAGGAGTTCGAGACCAGCCTGGTCAATATGGTGAAACCCTATCTCTACCAAAAATACAAAAATTAGCCGGATGTGGT  
GGTGCATCTGTAGTCCCAGCTACTCGGGAGGCTGAGGCACAAGAATCGCTCGAACCCAGGAGGCAGAAGTTGCAGCTAGCCGAGATCACACCAGCCT  
GGGTGACAGAGCAAGACTCCATCTCAAAAAATAAATTTAAAAACAACAAAACCAAACACACCCAACACAA

57

GTGGCGGTGACTAGCTGCCCGAAGCCACTCCCACAATTCAGTCTGCTCCTGCTGAGAGTCTCACATCTCCTGGTGCCTCCTGCTCAGGAGCATCGGTC  
TCACCCTCCGAAGCAGAGCCCCTTTGCCTCATGAAGCGTTTTCAAACAGCCTACTCACAAGAATCAAGGAACGCCCGAAGCCCAGTTCCAGGGCCCT  
GCCCAGGCCTGAGGAATCTAATGACAATGCCATAGTGAAGGATCCTGGCCTGGTTTAAGGTCACAAGGACACGGGGGTAGGGGAGTAGCTGAGGTTG  
GGAAGAAGTGTTAGGAGTTGGTCTGCAGCACACTTCAAAGTCACGTCTTCCCATCTCGAGCCTTCCATCATCAGGTTAAATTAAACTCTGGAGCTGGG  
GTGGAGGGAGGCCTGAGCCCAACCAAGCCCAGCTGAATGGTTTGAGAGATCTGAATCAGCCGGAAGCAACTGCTCTTGTCCCCAGAAGCCGTGTCT  
CAGTTCCACCTGGCATCGCCAATTATCTGTGCCTCCGACATAGGGTGTTTTTTATTCCCTCGAAATAGAGCTATAATTAATCCAAAATTGTCTGGAGAC  
TTGATAGTCATGGCAAAGCAGAACACAGTGTCTGCAGACAAAAACCTCTTTCAATAAAGATTAATTATTCGCAGCCCGTGTCCCAGGCCTGGACCA  
TGTGGGGAATGAATATGAAGGGGAGGGAGTACCCAGCTCAGAGGAACTGGAGGGGCTCCTTCCCTCCCCCACAGTGCAGCCCCCATCTTCTCTCA  
GAGACTAATCGTCGACCTGCAGGCATGCAAGCTTGGCGTAATCATGGTCATAGCTGTTTCCTGTGTGAAATTGTTATCCGCTCACGATTCCACACAACAT  
ACGAGCCGGAAGCATAAGTGTAAGCCTGGGGTGCCTAATGAGTGAGCTAACTCACATTAGTTGCGTTGCG

58

GGTTTAGGGTTATACATTTGAGAGACAGAAGAAAGCAAACACTTCTTAACAAAATTGAACCTGTAACCTTTGACCTAGTAGTCTCAGGCTTTCCTGAA  
CTAAATGAGGCAGATTATAAACTGTGTATTGTTTAGTGGAGACTTTATGTTCTGTTAATACTCTGAATTTTAAATTGTTGTATAGATTATTATATCTAGTGTA  
CAAATTAATACCAAATCCGTATTAATCAAGTATAATTGTACTTTACAAACTCTTAGCTTAAAAACAGTTTTTCATTATGTGACATGTCAGAAACAACCAA  
ACACACCCAACACAAA

59

CAAATATTCTTCAGACATTTCTTTATGCATACACATTTATAAAGAAAATAATTTTATCTTTACAAAAATGAGGACACATTATACACACTATTCTGCAAGTTG  
ACTTTTTCTCTACATGAGAGTAAGGCAATATAGTATGGTGAGTGGTTAAGGTTACATGGACTTTGAATTCAGACAGATAAGGGTGTGAGTCCCATCACA  
GGGATAGTATCTTACCCCCTAGTTTTGTTGTGAGAAGTGAGATGATGCACACAGAACATTTTAAACTGTGTTTTGGCACATGATGAGTTTTTAAAAAT  
ATTAAGTGTGGCGGGCGTGGTGTGACCCATAATCCCAGAACTTTGGGAGGCTGAGGTGGGTGGATCACCTGAGATCAGGAGTTCGAGACCAGA  
CTGACCAACATGGTGAAAACCCTGTCTCTACTAAAAACATACAAAACAAACCAAACACACCCAACACAAA

60

TTGCGTATTGGGCGCTCTTCCGCTTCCTCGCTCACTGACTCGCTGCGCTCGGTCGTTCCGGCTGCGGCCGAGCGGTATCAGCTCACTCAAAGGCGGTAATA  
CGGTTATCCACAGAATCAGGGGATAACGCAGGAAAGAACATGTGAGCAAAAAGGCCAGCAAAAAGGCCAGGAACCGTAAAAAGGCCGCGTTGCTGGCG  
TTTTTCCATAGGCTCCGCCCCCTGACGAGCATCACAAAATCGACGCTCAAGTCAGAGGTGGCGAAACCCGACAGGACTATAAAGATAACCAGGCGTT  
TCCCCCTGGAAGCTCCCTCGTGCGCTCTCCTGTTCCGACCCTGCCGTTACCGGATACCTGTCCGCCTTTCTCCCTTCGGGAAGCGTGGCGCTTTCTCAT  
AGCTCACGCTGTAGGTATCTCAGTTCGGTGTAGGTGTTCCGCTCCAAGCTGGGCTGTGTGCACGAACCCCCCGTTCAGCCCCGACCCTGCGCCTTATCC  
GGTAACTATCGTCTTGAGTCCAACCCGGTAAGACACGACTTATCGCCACTGGCAGCAGCCACTGGTAACAGGATTAGCAGAGCGAGGTATGTAGGCGG  
TGCTACAGAGTTCTTGAAGTGGTGGCCTAACTACGGCTACACTAGAAGAACAGTATTTGGTATCTGCGCTCTGCTGAAGCCAGTTACCTTCGGAAAAA  
GAGTTGGTAGCTCTTGATCCGGCAAACAACCCACCGCTGGTAGCGGTGGTTTTTTTTGTTTTGCAAGCAGCAGATTACGCGCAGAAAAAAGGATCTCAA  
GAAGATCCTTTGATCTTTTCTACGGGGTCTGACGCTCAGTGGAACGAAAACCTCACGTTAAGGGATTTTGGTCAATGAGATTATCAAAAAGGATCTTACC  
TAGATCCTTTTAAATTAATAAATGAAGTTTTAAATCAATCTAAAGTATATATGAGTAAACTTGGTCTGACAGTTACCAATGCTTAATCAGTGAGGCACCTAT  
CTCAGCGATCTGTC

61

TTGTGTTGGGTGTGTTTGGTGTGTTTTATGTATGTATGTATGTATGTATGTATGTATGTATGTATGTATGTATGTATGTATGTATGTATGTATGTATCTATGTACTCCAATTTAGACT  
CCACCTTCTCTCCAATCCTAACATATTTTATGGTTTTGACCGGAAGTGATAGAGTAATCAACTGTTCTGCCTCCCTTAAACTGACCTGACCTCAACCCCT  
TGATGTCTAATCAAAGCTCTTCACCTGTATCACCCATAGCACTCCCGTGACTTCTCCCATCCACCCAGCACATTCAAAGCCATCTGTCTCTACAGA  
TAACCATGAACTCTGATGTGACAACCATTCTCTCTCACCCACCCCCAACACACCCAACACAAATC

62

TTGTGTTGGGTGTGTTTGGGTTGTTTTTTGAGGTACCTGGTCAGAGCTAGGAGCAGTCCCCTGCTAAGGGAAATTACAAGGCTTTGTTTTTATTACAC  
ACCCTGCTGCTTTCCACAAAGGTTTTAAGACTGGGAACCTGAGCCTCCTCTATCTGAACAAGTAGAATAGAGGCCTGAAAGCACAAAATTGGCTTTGTG  
TCCAGCAGACACACCCATTCTCAGGAAGGTGAGAATCCCTCCCTGCTGAGAATGGAAGTAGGACAGAGAGAGAGGGAGGCCAGCATGAGGGTGTGAG  
TCTGTCTTACCTCTGGAGTATCCTGGAATGGAATGAGTGAGTGTGTCAGAGGAGAGAACTGTCACCTCCCCAAAACCAGCCTGGCAGGAGAAACCATGA  
AGTCTTAAACACAGTTCCACTGCCACCTGGTGGCGGCGTACTCAATTTGCAGGCTTAGTGTGTACCCAGTAGTTCTCAGTCACATACTATACTCAGTCAC  
ATACCTAGAAAGACCCATGGTCACTCCTAGTCCCCAACCCACCAAACACACCCAACACAAATC

63

TTGTGTTGGGTGTGTTTGGTGTGTTGTTGGTGTGTTGACTCACAGAATGTTGAGTGGAATTTTCATGTACCCTTGTAGGGGTACGTGTCTCAGGTTGGTGGAGAA  
GACAGTAAGTCTTCTAAAAGTGTATGGAACCTTCTTAAAAATGCAGAGAGAGAGAGTCTGTATACACAAGAAATTGGAACCTTCTATGGGTTGCAGCAT

GGAAGTTTAATTATTCTTTCTCTGGCTTTAATTTTAAAATGTATTTAAGAGTACAGGAACCAATTAAGATGGCAGAGTAAAGACATTTCTGCCCGTTC  
TTTGAAACCAACTTAAAACCAATACAAAGAACAACCCACCAAACACACCCAACACAAATC

64

TGTGTTGGGTGTGTTTGGGTTGGTTTGGCTATTGATTATTGCCACAATTCAGATCCTGTTATTAGTCTATTCAGAGATTCAACTTCTTCTGGTTT  
TGGAGAGTGTATGTGTCGAGGAATTTTGGCCATCCCATCAAGCTACCAATGACTTTCTTCACAGAATTGGAAAAACTACTTTAAAGTTCATATGGA  
ACCAAAAAGAGCCCACATTGCCAAGTCAATCCTAAGCCAAAAGAACAAGCTGGAGGCATCACACTACCCGCTTCAAACATACTACAAGGCTAC  
AGTAACCCAAACAGCATGGTACTGGTACCAAAACAGAGATATAGATCAATGGAACAGAATGGATCCCTCAGAAATAACGCTGCATATCTACA  
ACTATCTGATCTTTGACAAAACCTGAGAAAAACAAGAAATAGGGAAAGGATTCCCTATTTAATAAATGGTGCTGGGAAAACCTGGCTAGCCATATGT  
AGAAGGCTGA AACTGGATCCCTTCTTACACCTTATACAAAATTAATTCAAGATGGATTAAGACTTAAATGTTAGACCCACAAAACCAAACACACCCAACACAAATC

65

TTGTGTTGGGTGTGTTTGGGGGGGGGGTAAAAAGCACAAAAAATGTAAAATCTCGGGCAATCATGCCGATTCTCTCCTTTATTAATTACGATGTTCCCT  
ATTAACGCTGTAGTAAATCATGACCCCATTTGAATTAATACCTCCCTTAAAAATGGTTTAAAACAATGTACCTTTACATTATAACTGATACGTAAATCAAT  
TTATGTTGGAGCTTCTCATAGACTTTGAGATATTTGACACTGCCAATCTTTAAGGGAAGTCTTTATGACCGACTTAGGCAGAGCTTTTGGTTGAGCAT  
CTTTTGAAGCCTAGGATTGTTTGAACGCGGGTGAATGTCTTTTTTGTATCCTTGGCTGTTGTGGCGGGGGGAATATCTTTCACCTCTTTTTTCGG

66

TTGTGTTGGGTGTGTTTGGTTTGGACTGGAATGGAATGGATTGGAATGGAAATGAATGAAAGGGAATGTAATTGACCTGCGTGTGATGCAATTTACTGT  
AAAGAAAGGTATTGCTGTTGTATGGGATGCCTATAATGGATGTTGCTCCACACACCACCAAACACACCCAACACAAATCTCTTTAGGATCCCCGGGTAC  
CGAGCTCGAATTCGTAATCATGGTCATAGCTGTTTCTGTGTGAAATTGTTATCCGCTCACAATTCCACACAACATACGAGCCGGAAGCATAAAGTGTA  
AGCCTGGGGTGCCTAATGAGTGAGCTAACTCACATTAATTGCGTTGCGCTCACTGCCCGCTTTCCAGTCGGGAAACCTGTCGTGCCAGCTGCATTAATG  
AATCGGCCAACGCGCGGGGAGAGGCGGTTTGCCTATTGGGCGCTCTTCCGCTTCCCTCGCTCACTGACTCGCTGCGCTCGGTCGTTCCGGCTGCGGCGAG  
CGGTATCAGCTCACTCAAAGGCGGTAATACGGTTATCCACAGAATCAGGGGATAACGCAGGAAAGAACATGTGAGCAAAAGGCCAGCAAAAGGCCAG  
GAACCGTAAAAAGGCCGCGTTGCTGGCGTTTTTCCATAGGCTCCGCCCCCTGACGAGCATCACAAAATCGACGCTCAAGTCAGAGGTGGCGAAAC  
CCGACAGGACTATAAAGATAACAGGCGTTTTCCCCTGGAAGCTCCCTCGTGCGCTCTCCTGTTCCGACCCTGCCGTTACCGGATACCTGTCCGCCTTT  
CTCCATTCGGGAAGCGTGGCGCTTTCTCATAGCTCACGCTGTAGGTATCTCAGTTCGGTGTAGGTCGTTCCGCTCCAAGCTGGGCTGTGTGCACGAACCC  
CCGTTTACGCCCCGACCCTGCGCCTTATCCGGTAACTATCGTCTTGAGTCCAACCGGTAAGACACGACTTATCGCCACTGGCAGCAGCCACTGGTAAC  
AGGATTAGCAGAGCG



67

ATCAGCTCACTCAAAGGCGGTAATACGGTTATCCACAGAATCAGGGGATAACGCAGGAAAGAACATGTGAGCAAAGGCCAGCAAAGGCCAGGAA  
CCGTAAAAGGCCGCGTTGCTGGCGTTTTTCCATAGGCTCCGCCCCCT

68

TTGTGTTGGGTGTGTTTGGTTTGTGGTGTTTTAAAAAATAAATATGTGTGTGTGTAGATAGATAGCTAGATAGATAATCTCCATTAGCTACCACCTGGA  
TCAAATAATAGAATATGTTCACTACCCCAAACACACCCAAACACAAATC

69

TTGTGTTGGGTGTGTTTGGTGTGTTGGTTCTATGTTGACTGATATGGTGTTTTGCATGTAAGAATAACCTAGGAAAATTCAGTACATTTAATTGTTTAATT  
GAAGGGCAAAAATGAAAAAAAATTGCAAAGGATACTGAAATCACCTTCTAGATTTATCAGATGGTTTTAACAGCAACTAATAAAAAACCCCTAGAAAT  
AATTAACCTCTTATGTCAAGAAAGAAGAAATATACATTTGAAAAAAAACCCAAATTCACCAACACAAATCTCTATGGGATCCCCGGGTACCGAGCTC  
GAATCAACATCATGGTCATAGCTGTATTCTGTGTGAAATTGTTATCCCAATGCAATTCCTCACAACATTTTAACTGAAGAATCAAGAGGTGAATTTGC  
GACGTCTATAGAGCGAAATAAATCACATAAATTGCCATGTAATCACTATCCACTTTCCGATTATGAACCCTGATTAGCCAATGGATTTAATGCATCGGGCA  
ATCCGCTGGGAGAGGATGACCGCAATGTGAAAATGCGTTAGCTTCCTCGAGAACCCCAAACCCAAACACACCCAAACACAAATC

70

TTGTGTTGGGTGTGTTTGGGGTTTGGGTGCATAGTATTCCATGGTGTATATGTGCCACATTTTCTTAATCCAGTCTATCATTGTTGGACATTTGGCTTGGTT  
CCTAGTCTTTGCTATTGGGAATAATGCCACAATAAACATACGTGTGCATGTGTCTTTATAGCAGCATGATTTATAATCCTTTGGGTATATACCCAATAACGG  
GATGGCTGGGTCAAATGGTATTTCTAGTTCTAGATCCCTGAGGAATCAAACACTGATTTCCACAATGGCTGAACTAGTTTACACCCCCCAAACACA

71

TTGTGTTGGGTGTGTTTGGTTGTTGGTTTGAAGATCTGGTAATAACCAGGAGACAGGATGTTCTAACAGGAAGTACTGTGGCTTGGGAGAGACAGAT  
TCTACTTGTAATAATGAGGGCATGAGCTGAATGATTTTTTCATGCCTTCTGACTGTAAACATCTGAGGTTCTTGATATAGAGCTTCCTTCAAAGCCTGAG  
ACATTCAGACAACCTTGCCCCTCTTCCAATTAGGGAACCTGATCTTTGGAGTCTTCCACACCCCAAACACACCCAAACACAAATC

72

TTGTGTTGGGTGTGTTTGGTTGTGGGTTGCGCTGGATCAAGGAATTCGCCACTCCACCCCATGTTCCCTCTCAAAGAGGAAGAAGAAAGAGAGCCTA  
GTAAAAGCCCTTCCCAGTGAAAAGCCGTGGGGTCCCTCCATACATGTCACCAAATAGGGGACAGGAAGACCAAGAATCAAGAGGCAGCAGGAGG  
GCTAGAGGAAGAAGACCTGGAGACCATGGGGAGCCAAACCAACTGCGCCTTTAAATCCTTATCCAAAACAAAACCAACACACCCAAACACAAAT

73

TTGTGTTGGGTGTGTTTGGTGTGTGTGTGTGTGTGTGTGTGTGTGTGTGTGTGTGTGTGTGTCTTCCCTCTCACAGGCAGAGCAGACACACCAAGCTGCTGACCATCAAG  
GGTCGGCAAATTACAGACCTACCTCTCTTATGAGCCCCATAACAACTGTGAGTGGCGGGAAGAAAGCAGGGTAAAAACCACCGAAACACACCCAA  
CACAAATCTCTAGACGATCCCCGGGTGCCGAGCTCAAACCTCCTGCGCCTTTAAATCCCTGTTCCCTGTGTGAAATTGTTATCCAATACAAAT

74

TTGTGTTGGGTGTGTTTGGGGTGGTGTGCTTACTTTAATTCTGTTACAGATTTAAAGTAGGCACATCTAACCTAAAACCTGTTTATTATTTTTGTAACA  
CAAATAAAGCCCGAACTTGTCGGGCTTTATTAACAAACACCAAAACACACCCAACACAAATC

75

TTGTGTTGGGTGTGTTTGGTTTTTATTTTTTTCCATAAGTTATTGGCGTACAGGTGGCATTGGTTACATGAGTAAATCTTTAGTGGTGATTGTGAGATT  
TTGGTGCACCCATCACCAAGCAGTATACTGCACCATATTTGTAGTCTTTTATTCCTCACCGCCCTCCTACACTTCCCCCCCACCCCAAACACACCCA  
ACACAAAT

76

TTGTGTTGGGTGTGTTTGGTTGTGTGGTGTGCTCTCATGGAGAACCTCTGCTAGGGCAGTGCAGAAGGGAAATGTGGGGTCAGAGCCCCGGTACAGA  
GTCCCTACTGGGGCACCACCTAGTGGAGCTGTGAGAAGATGGCCACCAACCTCCAGACCCCAGAAATGGTAGATCCATCTACAGCTTGCACTGTGAACC  
CACCCACCAAACACACCCAACACAAATC

77

TTGTGTTGGGTGTGTTTGGTTGGGTGTTCTGGACTATTTGAGTGGGCCCTAAACGCAGTCTCAAGTATATTTATAAGAGGAAGACAAAGCCGGGCGCGT  
TGGCTCACGCCTGTAATCCAGCACTTTGGGAGGCTGAGGCAGGCGGATCACGAGGTGAGGAGATTGAGACCATCCTGGTTAACACGGTGAACCCCT  
GTCTCTACTAAAAACAACAACCCAAACACACCCAACACAAATC

78

GCAGCTTGCATGCCTGCAGGTCGACGATTTGTGTTGGGTGTGTTTGGTGGGGGTGTTCTACGGGGTGGGGGCTTGAATGATGCTCTTGGGTTTTTCC  
TCTGCCTTTCTCTTCTGCTGGGCTGTGGGTGTTAGGGGGCACCGTCATCTCCTTTCTGTGGCTCTGTCTTCCTTTTGCTACAGGGAGGAAAGGGGAT  
TGCCCTAGGACTGTTAAGAAACAATCCTATTTTCAAAGGCTGTGATGAGTCATGTCCATGTATAAAGAAATGCTGCACATTAGTCTGCAGCAAGAGCTGT  
GTAGTCCCAATCTCTAAGCAGAAGCTGGGAACTGGAACCATCTCTCAGAGTATGTGCGGTGGTAAGGGACAGTGGAAGCCAGGCTTGGGTGTC  
CAGAGACCTGGGACAAAGACTGAGGTTACCAAGTACTGGCCAGCAGGTCCCTGGGCACATCTCTCTGGTCTCTCTGTGCCTCAGTTCCCTCCCTGTGT  
AAGATGGAGAAATGCCTACTTCAGAGGGGGAAAATTTATATATTACATATTATATATATATAATTATATATATACACACATATGTGTATATATATATGTGCAC

ATACATATATACAAATTGGATAAACATGTGCTTGTCAACAAGAAATGTGGAAGAAGTGATAATGGCTACTTCTGGAGAAACATGTTTGGAAAACACATA  
CATTAAAGGCCAGCATCACACAAGTGGGTAAACAGCATAGGTGCATTTTGTACATGACTGTGAAATTGTCTTTGAAAGCAGATGGAGAATACCTTTG  
GGATTTTATGTTAGGCATTTAATGAGGGCCAGTGAAATGAAAGAATGGTTATTTTATCAGGAGGAAAAATGAATCCTTTTTTATAGGTGATGTTGGCTTG  
TGACATTGTCTCTTACTCAGGAGTGTGGGACCTATAAAAAACAACCAAACACACCCAACACAAATCTCTAGAAGATCCCGGGTACCGAGCTCGAATT  
CGTAATCATGGTCATAGCTGGTATCCC

79

GCAGCTTGCATGCCTGCAGGTCGACGATTTGTGTTGGGTGTGTTTGGGTGGTTGTAAATAAATATTTTAGTTGGGTGTTTGTGTAGCAGGTGATCTTG  
CTGGCTCCCTGTACTGTGTCTGTGTGGGGGCACCTGGTGCCATTCACTGAATGTGTCTGATGGATTTACCACACTCATCTGGGAACCTGTGGGATT  
GCCCTCCCCCTAAATCTAAACAATGCTATTTCTCAACGGCTCTGGAGGGGAGTTTGTGTATAAAGAATTGATTTTCATTAGTCTGCTACCCCTAGCTACTCA  
TCCCCAATATCTAATATCATTCTGTAAACTGAAACCATTCTCTCAGACACTGTGCCAGCCAAGGCCAACGGAAAAGCCAAGGCTTGGGTGCCATCC  
CCCTGTACACAAACACTGATGTTACCCATGACTGGCCATGATGCCCTGGGAACATCTCTCTGGTCTCTCTGTCCCTCAGTTCCTCCCTGCGTAAGATG  
GAAAAATGCCTACTTCAGAGGCGAAAAATTTTATATATTACATATTATATATATAATTATATATATACACTCCTATGTGTATATATGTATGGCCACCTGCATA  
AATGAATCTTGCATAAACCTGTGATAGGCACTTTACATGTTGAGCACTTTATAATGTCTACTTTTGGAGAATCATGTCTGTCAGACCTCCTACTTTTAAAA  
GCCATATCACTCACTTGGATGAACTACTACGGTGCTCCTCGGAACCTGGGTATAACTGGATATAACATGAGATGAAGAAGACCTCTAGGAGCCTAT  
GACAGTAATTAAGTCAGGTTCCCTGGAGATTTTCCATATGCTCTTTCCCTGACGAGAAACAAAAATCTACGCACAAGTGATGTGTGGTTAAGCCCTA  
GACGCCTACACAGATACCGGTGGGACTCCCCCTGAAAGAACCCTCATGCGCTCAACTGTCCGACCCTGCGGCCCCCGGATACCTGTCCGAATTCTCAC  
TTCGGGAATAGCGGCGCT

80

GTGCAGCTTGCATGCCTGCAGGTCGACGATTTGTGTTGGGTGTGTTTGGTTGTTGGGGTTGAAATCTCTGAGCTGAGATCCCCTTGGTCACTGCTTGT  
GTGTCCCTAACCAATGGCCTCAGCATTTTAGACCTCATTTCTCCCGTTGTCAAATGATGGAGCTTGACTGCCTGATTTTCTCGAGTAGAAACCCCA  
AACACACCCAACACAAATC

81

CTGCAGCTTGCATGCCTGCAGGTCGACGATTTGTGTTGGGTGTGTTTGGGGGGTCTGTGTTCTTTGCGTTTAGCCTGAATAGAGCTTTATGACTGTCTT  
TACCAATAAAGCATGGCTCAATGGAGGCTCTATGACTTCTGAGTCTAGGTCATTAAAAAAACAACAAACACACCCAACACAAATC

82

ATGCAGCTTGCATGCCTGCAGGTCGACGATTTGTGTTGGGTGTGTTTGGGTGGTTGTAAATAAATATTTTAGTTGGGTGTTTGTGTAGCAGGTGATCT

TGGTGGCTCCCTGCAGTGTGTCCTGCATGGTGTGAGCACCTGGTGTGAGCATTCACTGAATGTGTCTGATGGATTACCACACTCATCTGTGAACCTGTAGCT  
CAGCTAATCCCCCTAAATCTGTGAGTGGCCCTTCTCAGCTGCCCTGCAGGGGACTTTGTGGAGCAGGAATTTATTTTGACCAGCAAACCTACCCTTGTGA  
CTCATCACCAAGAGCTTCTATCATTCTCTAGCATGATTTGGAAATTAAGACACTTTGACCAACCAAACCAAACACACCCA

83

CGTGCCAGCTTGCATGCCTGCAGGTCGACGATTTGTGTTGGGTGTGTTTGGGGGGGTGTTGCCAAACGAGTACGGCGCAATGCTCGCGTTCATCAGCC  
ACAGCTGTGCGCCGCGCACATCGACCCAGGCATCTTGCAGCGACCCACCGTGTGCGCCGCGAGCGACTTAATCTCCGTCCCGAGCAACACAATCCCTGCC  
TCAAACGTCTCGAGAATCTCATAGTCATGCCCTGCCTTGCAGTTGGAGACGAGCTCCGGATCGGGGGCTTTTTCTTTGGCCATGGGTTTATCATAGCGA  
AAAGAGGGGAGTGAAGGAAGGTAATCATTTTTTGTAGGTTGTGAAAGAAATTTCAAATGGGGTACAATTTTGGGCACAAAACGAGAGGAAACACCATG  
ATCAAACCACCAAACACACCCAACACAAATC

84

TCCAGCTTGCATGCCTGCAGGTCGACGATTTGTGTTGGGTGTGTTTGGTGTGGTTTTGAAAGTGGTTGGGGTGTTCAGCCCTGCAACGACATCGAAGA  
CGCTGGCAAGTTGCCGATTGATTTTGATTACTACGTCAGAGAAGTGGAGAACTATGTCTGAGTCTAGCTTGAGCAAACAAGTTGACGGGAATCACTA  
CAAAGACCAAGCAATTCAACCCGTTGAGTACATTCATGCCAATCACATCGGTTATTTTGTAGGGGAACGTAATCAAATACGTGACCCGCTGGCGCAAGA  
AGAACAGGCTTGCTGATCTTGAGAAGGCCAAACACACCCAACACAAATC

85

GCAGCTTGCATGCCTGCAGGTCGACGATTTGTGTTGGGTGTGTTTGGTGTGGTTTTGAAAGTGGTTGGGGTGTTCAGCCCTGCAACGACATCGAAGAC  
GCTGGCAAGTTGCCGATTGATTTTGATTACTACGTCAGAGAAGTGGAGAACTATGTCTGAGTCTAGCTTGAGCAAACAAGTTGACGGGAATCACTAC  
AAAGACCAAGCAATTCAACCCGTTGAGTACATTCATGCCAATCACATCGGTTATTTTGTAGGGGAACGTAATCAAATACGTGACCCGCTGGCGCAAGAA  
GAACAGGCTTGCTGATCTTGAGAAGGCCAAACACACCCAACACAAATC

86

TCCAGCTTGCATGCCTGCAGGTCGACGATTTGTGTTGGGTGTGTTTGGTGTGGTTTTGTTTTAAAGTCACAAGACAATGCTTCAGGAGAAAATCTGGGGAGG  
CGGTGTGCGGGCAAGAGGTGGAGTGGGGGAAATGCCTATGGAAGGGGAAAACTCATCAGTGGGACCGACCCACTCCATGCGTTGACGGAATCAC  
ATCTATAACCGAGCCCGGCGAACAGATGAGTACATTCTTGCAATCTCATAGTCGATTTGGGGGGAACTTATTCAAATAC

87

GTGCAGCTTGCATGCCTGCAGGTCGACGATTTGTGTTGGGTGTGTTTGGGTTGGGTGAAAGTAAGGATAAATAGAAAAAGAATCACAAATTAAGAATAG  
TTTTAAACATTAGGAAGACAAAGATTTTGTAGAGACAAGCAAACATTATCAGGATGCACTGCCCCTTCCATTCAAAGAAAAGATTAGATAGGGAAG

GTTCCAAATTGCAGTGTGGCTAAGAATTGCATTAGCTGATCAGTGTAGGAAGAAATCAGCAGTAAATATACTGATCAAAAGATATTCTGGAGATGAAAT  
CTTTTGCTTTTTAATATCCGAAGGTCTTTTCTGAATGGAAAAGGCTAGTCCAGGTAAAGAGAAAGGGAGAGTGCTTCTTTTGAGAAATTATTTCAGTAAA  
GCCTACCTTTTGCCAACAGCCAGGCATGGGTAAGCCATCTGGCCCCTGTTTTAAAGAGAAAAAAAACCAAACACACCCAACACAAATC

88

GCAGTGCAGCTTGCATGCCTGCAGGTCGACGATTTGTGTTGGGTGTGTTTGGGGGGGGGTTGATTAAGTGGAGATATTTTGTGTTGTAATTTCCCTTTTTA  
TTTTTTTTTATTTTTTATTTTTTTTACAGATAGCACTTTTATTGCCACTATTTGAAGTCTGAACTTTAAACAGATTCTTGGACTGGTGGTTCATATCCATCA  
GCTCATTCAACTTTAGCACCCGCTCTCGTCCCCAGCAGCTTTTCCAGAATACTGCCTTACCATGAAGCTCCATGAACTTTCCAGTTCAAACCTGGGC  
TTCTTCAACATTTTACTTTTCTAACGAAGACATCATAGAGAGGATAAATAGATTGGCAAGTCTTTTCTATGTCTTTTCCAATGCTGTCTGGAATCAATTT  
ATTGACCACACCACACACCAAACACACCCAACACAAATC

89

AGCAGTGCAGCTTGCATGCCTGCAGGTCGACGATTATCCTTTCTTCCACTTAATCGAATCGGCTATTGAAGCTTTTGTATGTGTCCTGAAGTTCTTGTGC  
CATGGTTTTAGCTCCATCAGGCCATTTAAAGTCTTCTCTACGCTGTTTATTCTAGTTAGCCATTCGTCTAACCTTTTTTCAAGGTTTTTAGCTTCTTTGTG  
ATGGGTTAGAACATGCTCCTTTAGCTCGTAGAAGTTTGTATTACCGACCTTCTGAAGCCTGCAACCCCAACCAAACACACCCAACACAAATC

90

GCAGTGCAGCTTGCATGCCTGCAGGTCGACGATTTGTGTTGGGTGTGTTTGGGTTGATGGGTGTGACTGACTAATAAGTCCTAAATGTGAAAGTGATC  
CGAATGCTTGGGTGATGGGCACCCACTGGCTGATCAACAATGGCGCAACCCTACAGCGGATTACCATGCGCTTGGCCGATTACTATCGATTGCCTCACC  
AGCCGATTGAATTGCATCAACCCGTTGCTGCCACGATGCATTTGAAGTCCCAATTGAACCTATCCGACGATGCGAAGGTTGAAGCTTGGGCCAAATTGC  
CGGAGACCCTGGCGCTACCCAGCATGAATCTCAGCAAACGATACCATGCGGGGCTGTTGGAAGTTAAAAACCCACACTATCTGAAAAAAAACCGTCC  
CGCTGTAGCCGCTGAAGATAACAACCCGACCCCGATGAAAGCAGCTATGACCGATAAGAGCAAACCGTTCTGAGTGACTTGCCCGAACACTTGCG  
CCGTATTCGTAGTTTTGTGCGTTCGTGAAGGACGCTGACCGAGGGACAATCTTCGGCGATTGAGACCGGTTGGCCACGATGGGGCGTGGACTTTACGC  
CTGGCATGACCAATTGGGATAACCATCTTCGGTTCGTCCGCACCACGCTACCTCGAGATTGGCTTTGGCATGGGCGGGGCAACGGCACAAATCGCTCGC  
AATCATCCGGTCAACGATTACCTGTGTATCGAGGTGCATCGCCCCGGTGTGGCAACCTGCTCAAGCTCATTGCGCAGGATGGCCTGACGAATCTGCGC  
ATCATGACGCACGACGCTGTGGATGTTGTCAGCGAGATGATTGCTCCAGATTGCTAGACGGCATCCTGATCTTTTCTCCGGATCCCTGTCTCAAGAAG  
CGGAAATACAAACCAAACACACCCAACACAAATC

91

CGCAGTGCAGCTTGCATGCCTGCAGGTCGACGATTTGTGTTGGGTGTGTTTGGGGGGACGCCAACAAAACAAAATCAAGTGCATTAATGGATCCTGAA

TCAAATTGTGATCCATTCCCAACTCCACACAACCTTATAGACGGAAGCATACCAATTGAAGACTGGGGTGCCGAGTGTGTGATCTAAGTCACATTAATTG  
GGAAGGGCTAACTGCCCCGCTTTCCAGTCTGGAACCCGTGTCGAGCCAGCTGCATTTAGGCCCGGAAACTAGCGGGGAGAGGGCGGTTTGCCTAAGGGC  
GATTTTCAAAGATAACGATAACTAAATCGAATCGATCACTCAATCGGCTGCGGAGAACGGTATCCTCTCACTCCACCGCTATCATATATTCATCCACAAA  
AAATGGGCAATGGGTGAGGAAGCCATGTGCAATGGTGACATCAAAGGTCGGTATGTAAAAAGGATCGTAGAGGGCGGTTAACATAGATGCATCCCCA  
CTGTCCGTATCCCAAAGTCCACGAACAGACCAAGGTGACAACCCTAATTGGACTAAAATTTACAAAAAATTCCCCCAGTTAAGCCACTACTGCGTTG  
TCGGTTCCTTACCACCGACCAAAAAACACAT

92

GAGTGCAGCTTGCATGCCTGCAGGTCGACGATTTGTGTTGGGTGTGTTTGGTGGGTGTGTGTTACATAAGCACCTAAATTTTTGGCAGAGAGAAGGC  
ACCAGATTGGCAATAAATCACCTGAGAATAGCTTTTCAGTATGAAAAATGTTGGACTCTATGATGCTTCTTATGTAACATTATCAAAGATAACCCATTTAC  
TACCATTTATCTTAGTCCAAACACACCCAACACAAATC

93

GAGTGCAGCTTGCATGCCTGCAGGTCGACGATTTGTGTTGGGTGTGTTTGGGTGGGGGAGAGCATCAGGAAGAATAGCTAATGGATGCTAGGCTTAA  
TACCTAGGTGATGGGATGATCTGTACAACAAACCACCAGGCACACATTTACCTATGTAACAAACCTGCACATCATGCACATGTACCCTGAAATGTAAAT  
AAAAGTTGAAGAGAAAAAAGTTCAGGAAATTTATGAAAAACAAACCTCTTCAGGCCAGGCATAGGTAGCTCACGCCTGTAATCTTAGCACTTTGG  
GAGGCCAAGGTGAGCAGATCACTTGAGGTGAGGAGTTGGAGACCAGCCTGGCCAACATAGCAAAACACTGTTCAACCAAACACACCAAACACACCC  
AACACAAATC

94

GCAGTGCAGCTTGCATGCCTGCAGGTCGACGATTTGTGTTGGGTGTGTTTGGGTTTGTGTTGGTTGGAATAGTTTCAGAAGGAATGGTACCACCTCCTCCT  
TGTACCTGTGGTAGAATTCGGCTGTGAATCCTTCTGGTCTGGACTTTTTTTGGTTGGTAAGCTATTAATTATTGCCTCAATTCAGAGCCTGTAATAGAG  
AAGTTGTCTCTATTCAGAGATTCAAGTTCTCCTGGTTTAGTCTTGGGAGAGTGTATGTGTCTAGGAATTTATCCATTTCTTCTAGATTTTCTAGTTTATTT  
GTGTAGAGGTGTTTATTGTATTCTCTGATGGTAGTTTGTAAAACAACAACCAAACACACCCAACACAAAT

95

GCAGTGCAGCTTGCATGCCTGCAGGTCGACGATTTGTGTTGGGTGTGTTTGGGTTTCAAGTGAAGCTGGAAGTTCAATGTTCTCAGATGTATCCACCA  
AATATCCCAGCTCATATCTCACAGTCCCCTCCTTCTCTAACAGGGATCTGACTTGAGCCTAAAAGACCTGTAAAGCTGCATGTTAAACCCTCTTTGC  
AGCTTTGCCCTCCTTATCATTCACTCCTGGCCTTGGTTTTTAGCATTGCTGGTCTGTACCACACCCAGTCCACCAAGTGAAAATCTCAAGAATTTAGAT  
GCTCAGTAAATTAAGTTTCCACACACCACACTGGATGCCTGCAAAGGAGTCCTTATTGCCATCTGTCTGGTTAATGATCCAGTTCCAGAATCCATAC

TGAAGAGGAGCTTTTTAGGGTGACTTCTAGTATCAGCTGTCATAGTTGATCTCTCCCTAAAAGCAGAACCTGAAACAAGGTCAGAGATGCAGGTAGTT  
GACTTGGGAGATGATGCTAGGAACTGGAGTAAGGGAGTAAGGACAGCAAGACAAGGAAGGAGAAAGACCAATAAAATGTATATGGTTGGTCTGGTT  
ACACTGTGGGCTACTGGAGCTCAGTCCTGCTGCAGATCCTCTGAAGAACTACGTAGAACACACCTTAAAATTGTTTCTCCAGGAACAGAGGACAGAA  
ACACTTGCTACTAACTACTATCCCCATAGTTCCCCTGAGGATGTAACTGTCCTGCTCAGCAACTTTCCACCCTTTGGAAAAACCCCAACAAACAC  
ACCCAACACAAATC

96

TTGTGTTGGGTGTGTTTGGTGTGGTTGGGTGCTGTGACTAGATGCTTCATGTGAGAGGGTGAACACAGTAAAAGGGAAATTTAGTTCGTTCCATAGGA  
GTTGCCAGTCTGGATCAGATTACTGATCCATAAATTTGGATACCTTCCCATAGTAACAGGGGCTTATTTCAAGAGCTTATCAAGAAGTCAGAATTATTT  
ATCAGATTCCAAGTCAAATGAACTATGCAAAGAAAGTTGAAAAAGATTTGAGAAGAGATTAGATGAGAAATTAATAATCTGAAACAATGGCCTATTA  
GTTTTTTGAATAATAAGTTGTACTACTCCTTTTGAATATGTACATTACATATAATTTACTAATAATTAGGTCAATTCATTAATTTGACTCTGGCTGCAAG  
GGAAGTTCTTGAAGCTCTTGTGTCTATAATAAACACAGATACCTTTTAAAGAAATGTGACTTTAAAAATCTGTTTCAAATATATTATGCAGTGGCATGTAA  
CTGATAATTGAATGTAATCATATGCATCTGCTCCAAGTATTGAGGCAGGAATCAACACTAGAACTAGACAAACACAATAAGATTAGACAAGAGATAGG  
TGGTCACACTAGAGATAGCTGTACAGGACAGCCTATCTAATAGAGCACACTGGAGGATGGCTCCCCAACACATACACACATAAATGCAGGTGATTTAAG  
ATTAGTTTTCAATCTTATTATTTTCTGTAATGATATCTAGTTGGAATAATACCCTTATTAAGAACTCCATCCTTATCCACCTAATTTGAAATGGCACCCCTT  
TCAAATATTTTATCAAATGTCTATATTCAAATACCAAACACAACCCAAACACACCCAAACACAAATC

97

TTGTGTTGGGTGTGTTTGGCTTGAGATATGGAAGCATGTCACATCTCCTGGCACTTGTGGACTAGGGTTTGTCCCAATCCTCACCTCTGTAAATACAT  
GGTGCATTGTAGAATTCCACGGTTGTTTGTCTGTGAGGATGCATTAACGATAAAAAGTAAGGATGATCAGCAAACCCACATTTCAACAAATCCTTAATCA  
ATAACCCCCACCATTAAGTGAACACTCACTGTGTACGACGCATGGTTCTAAATGCTTTACACATTTTAACTTATTTTGTCTTCATAAGGAACTATGATAT  
AGGCGCTATTCTTTTCGTCCACTTTTACACACGAGAAAATCAAAGCACAGAGAAGTTAAATCACTTGTCAAGATCATACTGCTAGTTGGAGGCAAAG  
CCAAACATTTGAACCCAGGTGTTACGGCTTCCGAATCCCTGAGCTTAATCATTATATTCCAAAAACCACCAAACACACC

98

TTGTGTTGGGTGTGTTTGGCTTGAGAGGTGGGAGCATGTCACAATGTCCTGGCAACTTGTGGACTAGGGCAGGTCATACAATCCTCAAACAACTAATGTAA  
ATACATGGTTCATTGTAGAATTCCACAGTTATTTGTCTGTGAGGATGCATTAAGGATAAAAAGTCAGGATGATCAGCAGACCCACAACACAACAAATCCAT  
AATCAATAACAGCCAACTTTAACTGAACACTCACTGTGTACAACGCATGGTTCTAAATGCTTTACACATTTTAACTTATTTTGTCTTCATAGGGAACTAT  
GATATAGGCGCTATTCTTTTCATCCACTTTTACAGATGAGAAAATCGAAGCACAGAGAAGTTAAATAACTTGTCAAGATCATACTGCTAGTTGGAGGCA

GAGCCAAACATTTGAACCCAGGTGTTACGGCTTCAGAATCCCTGAGCTTAATCATTATATTCCAAAACCACCAAACACACCCAACACAAATC

99

TGGGGCAGAGTCGGCCGGCGACGAGAAAGAGATGGGCGTAACAACAATATCCAAATTTAAAACAATAACGTTGAATGATAGACCTTTCACATAAAATT  
CCACATAAATTTTATGCTTTATTTAAGTCTCCCTGAGCTGGAA

100

AGGAAGGTCTCTTGTGTTTTTTTTTGTGCTTTTTAGGTTCCCTTTATTTTTTTTTTTTGTCCCTTCAACCTCTCCCCCTACCCCTCTTGGGGCCCCGCG

101

TTAATTGATAAGTTTATTGAAGTAAAGAAGGAACAACAAAAAAAAAACAAAAAATAAAAAAAGAAATTTCAACACATATCCAATCAACCCAAACAA  
AGAATGAACAAAAACAGACTGGCAACCCATAC

102

AAGGACCAAACAAACACAAACAAACACACTCGGGAGTACCTGTCTCCTGTACCCTAAAAACGCCACCACAACCTCTGTAGGGGATCCCCTTCTACG  
GACCTTTAATTCATAAGAATGAACATTGCTGCTTTCTGTCTAATGTTGGCCACGCTCACTGCTCCTCATCACATCCCATCTCTACTCTTAAGGGTCCAGA  
CTGTGGTGGCTAATGTGTGAGCTATGTGATGTTTCTTGCCTTATCCTGAATGCACTGCACGGAGCCTGAA

103

TTTTTTTATTTTTTTTTTTTTTTTTTTTTTTTTTTTTTTTTTTTTTTTTTTTAAATTAATTAATTTTTTTTTTTTTTTTTTTTTTTTTTTTTTTTATTTTTTTTTTT  
TTCCAAAACCCCCAAAACAAAACCCCCAAAAGAACCCCGGGGACCCAGCCCCAATTCCTAAACCGGGGCAAAACTGTTTCCTGGGGGAAATTGTTAT  
CCCCCCCCAATTCCCCACAAAAACAAACCGGAAACATAAAAGGGAAAACCCGGGGGGCCCAAAGAGGGAGCTAACCCCATTAATTGGGTTGCGC  
CCCCTGCCCCCTTCCAGTCGGGAAACCTGGCCGGCCCCCTGCATTAATGAATCCGCCAACCCCGGGGAAAGGGGGTTTGCCTATTGGGGGCCCTTC  
CCCTCCCCCTCACTGAATCCCTGCCCTCGGGCGTTCGGCTGCGGGGAAGGGTATCAACTCACTCAAAGGGGGGAAAACGGTTATCCCCAAAATCCG  
GGGAAAACCCAGGAAAAAACATGGGAGCAAAAGGGCCGCAAAAGGGCCGGAACCCTAAAAAGGGCGCGTTGCTGGGGTTTTCCCTAGGGTCCCCC  
CCCCTGAAAAACATCACAAAATCCACGCTCAAGTCAAAGTGGCCAAACCCACAGGGCTAAAAAGAAACCCGGCGTTTTCCCCTGGAAACTCCCT  
CCTGCGCTCTCCTGTTCCCACCTGCCCTTACCGGATACCTGGCCCCCTTCCCCCTCGGGAAACGGGGCGCTTCTCCTAACTCACGCTGTAGGTATC  
TCAGTTCGGGGGAAGTCGTCCCCTCCAAGCGGGGCTGTGGGCACGAACCCCCGTTTAAACCCGAACGCTGCGCCTTATCCGGTAACTATCGCCTTGAG  
TCCAACCCGGAAAAAACGACTTACCCCACTGGGAGCACCCTGGTTACAGGATAACAGAGCCAGGTATGTAGGCGGGGGCTACAGAGTC

104

TCCCAACCCCCCAAAAAAATTTTTAAAGGATCCCCGGGGACCCAGCTCAAATTTTAAATCTGGGGCATAGGTTTTTTTCGGGGGAAATTTTTTTCC



CCCCCAATTCCCCCAAAAAAAAAACCGGAAACAAAAAGGGTAAAACCGGGGGGGCCCAAAGGGGGGGCTAACCCCATTAATTGGGTGGCCCC  
CCGGCCCCCTTTCCATCGGGAAACTGGCGGGCCCCCTGCTTTAAAAAAACCCCAACCCCGGGGAAAGGGGGTTTGGGTATTTGGGGCCTTTCCC  
CTTCCCCCCCCACTAAACCCCTGGGCTCGGGCTTTCGGGGGGGGGAGGGGTTTTCCCCTACCTAAAGGGGGGAAAACGGTTTTCCCAAAAACCGG  
GGAAAACCCAGGAAAAAAAAATTGGAGCAAAAGGCCCCCAAAGGCCGAAACCCTAAAAAGGGCCCGTTGGGGGGGTTTTTAAAGGGTCCCCC  
CCTGAAAAAATCAAAAAATCCCCCAATCAAAAGGGGGGAAACCCCAAGGGAAAAAAAAAACCCGGTTTTCCCCCGGAAACTCCCCGGGGG  
TCTCTGTTTCCAACCTGGCCCTTACGAGAACCTGTCCCCTTTTTCCTTCGGGAAACGGGGGGCTTTTTCAAACCTCCCCCTGTAGGTATCTCAATTCG  
GGGAGGCGTTCCCCCAGTGGGGTGGGGGAAAAACCCCGTTAACCAACCGGTCCCCTATTCGGAATTTCTCTTTGGGTCCAACCGGAAGACAC  
ACTTTATCCCACTGGGCGCACCCACGGGAACAGGATAACCACGAGGGTTTTAGGCGGGGTCAA

105

TTGTTTTTTTTTATATAATGGCTTAGATGATTTATATGTACTCCTCTATCGTTCTTATTCTAAGAAATCCAGCGGACCCGCCCGATCTGTTACGAATCCCCG  
TTCCAGAGGAATTATCAGAAAAGTGTGCAAATGAGGGGGCGGGGGTAAAAGTCCTATTATTGAAATGTTAATGGGAGGGCCTGATAAATAAAAGGAG  
AAGATATGAGTGAAGCTACCTGTTTCATTCACCGCTGTATTACGGTGTGCCTAATCATTTTTATTTTCTGAGGAAAGAACTGATACGGCCAACGCAATA  
ATGGTTAAAGACCTTCGGCGAAATCGAGTCGGCCTACCGAACGAGATACCCTTACTCCAAAAACAACCAACAGAA

106

TTTTGGTTATTTCTTTCTATTTACCCAACCTACCAAAAATTTTTCTATAATTCTCTATATTTTTTTTTTTTTAATGGGAAATCATACCGATGGTCTTTTTGA  
TGACCCCGAATGTGTAAACCGCACACTTATGACAGAACATAGGATGCGGAAGCGGAAAATGGATAGCCTGGCGGGCCTAAAGAGCGTGTCAATCCCA  
TTAATTGAATTGCAAAACCTGACTGCCCTCT

107

GCAGCTTGCATGCCTGCAGGTTCGACGATTTGTGTTGGGTGTGTTTGGGGGGGGGTGGGAGTGTTAATGTCACCTCTGAGAAATCTGCCAGGCCTAAAC  
AGCAGGCTTCACTCACTTTACCCTTTGCCCTCAGCCCACTACTGTCCCTGTACCCAGCAACTGCCTCGCTCTGAGTCCCATCTCCTGCGTATAGT  
GCCACGGCACGAAAAGGACAGGACAGGACCAGGCTCTGCTGCTCCTCTCCTGTGCTGGTGCACCTGTGCACACGTGGCAGCCCACTAGGCTGTGCTCC  
AGCCTCCCCACACCCATCTTGCTCATGCACACGACTTCACCAACACACCAAACACACCCAAACACAAA

108

ACCAAAAACCCCCCAAAAAATCTCTAAAGGATCCCCGGGGACCCAGCTCCAATTTTTAAACCTGGGCATAGTTTTTCTGGGGGAAATTTTTTTCCC  
CCCCAATTCCCCCACAACCAACCCGAAACAAAAAGGGGAAAGCCGGGGGGGGCCAAAGAGGGGAACTAACCCCATTAATTGGGTGGCCCCC  
CCGCCCCCTTTCCAGTCGGGAAACCTGTGCGGGCCCCCTGGTTAATAAAACGGCCAACCCGCGGGGAGAGGGGGTTTGGGTTTTGGGGCCTCTTCCC

CTTCCCCCTCAATGAACCCCTGCCCCGGGCGTTTGGGTGGGGGGAGGGGTTTCAACTCCCTCAAAGGGGGGAATACGGTTTTCCCAAAAACCGG  
GGAAAACCCCGGAAAAAACATGGGAACAAAAGGCCACAAAAGGGCAAAAACCCTAAAAAGGGCCCGTTGCTGGGGTTTTTCCATAGGCTCCCCC  
CCCTGAAAAGAATCACAAAATCCACCCTCAAGTCAAAGGTGGCGAAACCCGAAGGGCTTTAAAGATACCCGGGGTTCCCCTGAAACTCCCTCGTG  
GGCTCTCCTGGTCCAACCTGGCGCTTTCCGGAAACCTGTCCCCTTTTTCCCTGGGGAAGCGGGGGGCTTTCCTAACTCACGCTGGAAGGATCCAA  
TTCGGTGGAGGGCCTTTGCCCAAGCTGGGGTGTGTGCAAAAACCCCGTTTAGCCGACAGCTGCGCTTTATTGGTACTATCTCTTGGGCCACCGGT  
AAAACACACTTTTTCCCCTGGGGCACCCCTTGTAACAGGTTAACAAAACGGGGTATGTAGGGGGGCTAAAA

109

AAAAAAACAAACCCCCCAAAAAAATTTCCGAGGGGCCCCGGGGGCCCCCTCAATTTTTAAATGGGGGGATATGTTTTTTCGGGGGAAAAATTT  
TTCCCCCCCCAATTCCCCCACAATAAAACGCGGGAAAAAAAAGGTAAAACCGGGGGGGCCAAAGGGGGGGGAAACCCACAAAAATTTGGGGGC  
CCCCCGCGCCTTTTTCCGGGGGAAAACGGGGGGGGGCCCCCTATTA AAAACGCCCCCCCCGGGGGAGGGGGGGTTTTGTTTTTGGGGGTTT  
TTCCCTTTTTCCCAAAAAAAACCCCGGGCCCGGGCTTTGGGGGGGGGGGGGGTTTTCCCTCCCCCAAGGGGGGAAAAAGGGTTCCCCCAAA  
TAGGGGGGATACCCGGGGAAAAAATTTGTAAAAGGGGGCCAAAAAGGCCAAAAAGCCAAAAAGGGGCCTGTGGTGGGTTTTTCCCTCCTGCCCC  
CCCCGTAAGAACACAAAAAACCCCTCCAACCAAGAGGGGGAAACCCCGAGCATTAAAAATACCGGGTTCCCCCAGAAAACCACCAGG  
GGGCTCCCGTGTCCCCCTAGGCAATAAAAAACCCACCTCTTTTCCTTCGGAAGAGAGGGCGTTTTTATAACCCACGCGGGGTATCAAACGGGGGA  
GGTGCTCCCCCAGGTGGTTGGTAGAAACCACGTTATCCACGCTGTGCTATACCGGAATATGTGTTAACACACCGGAGAGAACATTTTACCCCTGGT  
ACCCTGTGTAAAAAAA

110

TCCAGCTTGCATGCCTGCAGGTCGACGATTTGTGTTGGGTGTGTTTGGTTTTTTTTTTTTTTTTTTTTTTTTTTTTTTTTTTTTTTTTTTTTTTTT  
TTTTTTTTTTTTTTTTTTTTTTTTTTTTTTTTTTTTTTTTGCCCCAACCCCCCCACAAAATTTTTTAAGGAACCCCGGGGCCCCCCCCCCAATTTTTAAACCGG  
GGCAAAATTTTTTCTGGGGGAAAATTTTTCCCCCCCCAATCCCCCAAAAAAAAACCCGGAAAAAAAAGGTAAAACCCGGGGGGCCAAAAG  
GGGAACCAACCCCATTAATTTGGTTGGCCCCCGCCCCCTTTCCGCGGGAAAACTTTTGGGGCCCTTCTTTTAAAAAACCCCAACCCCGGG  
GAAAGGGGGTTTTTGTTTTGGGGGCCTTTCCCTTCCCCCCCCAAAAACCCCTGGCCCCGGGGTTTTGGGTGGGGGGGGGGTTTTTCCCTCCTCAA  
AGGGGGGATAACGGTTTTTCCCCAAAACCGGGGAAACCCGGGAAAAAAAATTTGGGTAAAAAAGGCCCAAAAGGGCCGAAACCCTAAAAAGGGC  
CCGTTGGGGGGTTTTTCCATAGGGTCCCCCCCCCTTAAAAAATTAAAAAATCCCCCCTCATTCAAAGGGGGGAAACCCCCCCGGAATTA AAA  
ACCCGGGTTTTCCCCCGGAAAACCCCTTGGGGCTTCCTTTTTGAACCTGCCCTTAAAGGAAACCGGCCCTTTCTCCCTGGGAAGGGGGGGCCTTT  
TTTCAAATACCCCGGGGGAACCTTTGGGGGAGGGGGTCCCCACAGGGGGGGGGGGCGAAACCCCTTTACCCACAGTGGGCCTTTTCGGGAA

TATGTCTGTGTCACACCCGGAAAAAACAATTTATCCCCGGGACACCCTGTAAAAGGATATATAAACAGAGATTTAGGGGCGTACAATTCTTAAA

111

CACCTCAGGGAATGCTGTGGACTTCTTTCCGGTCCTGCGCTACCTGCCAACCCAGCCCTCAAGAGGTTTAAGAACTTCAATGATAACTTTGTGCTGTT  
TCTGCAGAAAACAGTCCAGGAACACTATCAAGACTTCAACAAGAACAGTATCCAGGACATCACAGGCGCCCTGTTCAAGCACAGTGAGAACTACAAA  
GACAACGGTGGTCTCATCCCTCAGGAGAAGATTGTCAA

112

GATGAGTTCGTGTCCGTACAACCTGGCGTAATCATGGCCCTTCGGGGCCATTGTTTCTCTGTGGAGGAGTCCATGACGAAAGATGAACTGATTGCCCGTC  
TCCGCTCGCTGGGTGAACAACCTGAACCGTGATGTCAGCCTGACGGGGACGAAAGAAGAAGTGGCGCTCCGTGTGGCAGAGCTGAAAGAGGAGCTTG  
ATGACACGGATGAAACTGCCGGTCAGGACACCCCTCTCAGCCGGGAAAATGTGCTGACCGGACATGAAAATGAGGTGGGATCAGCGCAGCCGGATAC  
CGTGATTCAA

113

CCAAAACCCCCCAAAAAATCTCTAAAGGATCCCCGGGTACCCGGCCCTAATTTTTTAAACAGGGGCATAGTTTTTTCCGGGGGGAAATTTTTTTCCCC  
CCCAATTTCCCCAAAATAAAAGCCGGAACAAAAAGGGTAAAACCCGGGGGGCCAAAGAGGGAGCAAACCCCATTAATTGGGTTGGGCCCCC  
GCCCCCTTTTCCCTCGGGAAACCTGTGGGGCCCCCTGTTTTAATAAAACCCCAACCCCGGGGAAAGGGGGTTTTGGTTTTGGGGGCCCTTCCCTT  
CCCCCCCCAAAAACCCCTGCCCCGGGCTTTTGGGGGGGGGAGGGGTTTACCTCCTCAAAGGGGGGAAAACGGTTTTTCCCAAAATCTGGGGA  
AAACCCAGGAAAAAAATGTTGGCAAAAGGCCCCCAAAAGGGCCGAAACCCTAAAAGGGCCCGTTGTTGGGGTTTTTTCAAAGGCTCCCCCCCC  
TGAAAAAATCAAAAAAATCCACCCTCAAGTCAAAGGGGGGGAAACCCCCAGGGCTATAAAAATACCCGGGGTTTTCCCCCTGGAAACTCCCTCGTG  
GGCTCTCCTGTTCCCCCTGCGGCTTAACGGAACCTGCCCCCTTTTTCCCTTTGGGAAGAGGGGGTTTTTCAAACCTCACGCTGTAGGTATCTCATT  
CGGGGTAGGGCGCTCCCCCAAGTGGGGTGTGTGAAAAAACCCCGTTTGCCGACGCTGGGCTTTATATGGAAAATATCGTCTTGAGTCCACCGGG  
AAGAAAACACATTTTATCCCTGGGAGCACCTCTGTGACAAGATTACCCCCCGAGGATTTTGGCGGGGGTCTCA

114

ACCCAAACCCCCCAAAAAAATCCTAAAGGATCCCCGGGGACCCGGCCCAATTTTTAAATTGGGGCAAATTTTTTTCCGGGGGAAATTTTTTCC  
CCCCCAATTTCCCCAAAAAATAAAAGGGTAAAACCCGGGGGGCCAAAGGGGGAACAACCCCATTAATTGGGTTGGCCC  
CCCCGCCCTTTTCCAGGGGAAAACCTGGTGGGGCCCCCTTTTTTAAAAAACCCCCACCCCGGGGGGAAGGGGGTTTTGGTTTTGGGGGCCCTTTC  
CCTTCCCCCCCCAAAAACCCCTGCCCCGGGCTTTTGGGGGGGGGGAAGGGTTTCCCTCCCCAAAGGGGGATTTAGTTTTTCCAAAACCGGGGTA  
ACCCGGAATAAATTGGGAAAAAAGGGCCAAAAGGGCCAAAACCTAAAGGCCCGTGGGGGGTTTTTCTAAGGCCCCCCCCTGAAAAATAAAAA

ATCCCCCAATCAAAGGGGAAACCCCGGATATATAGTACACGCTTCCCCCGAAGCCCCGGGGCTTCCTGTCCA ACTGCGTTACGAAACATTTCGCC  
TTCCCCTTTGGAAGTGGCCTTCCAACCTCACGGTGAGTATCTGTTCGGAAGCTCGTCAAGTGGCTGTGACAACCTGTACCACGTTGCTTCGGAATTCTGGT  
CCACGTAAGACACTATCCCTGGCACCTGTTATGTTCC

115

ACTAGTGCAAAGCCCCTTTACAGAGTTGTCTTTCAAGTGAAAAATTAATGTAGTTAAAATTATTTGTTTAAAAATTCAATATATGTACAATGCAAAAA

116

TTTTTTGTGGACTGTCACCAAACAGATCTCCTGGCATGTAGACCTCAGGTAAGGGGAACTAAAGACTGAACTCTGACTGCCTGTTCTTTGTTCTATGTA  
TTTTTTGAGGGACCTAGAGGAGGTCATGCTCACGAGCCACAGCTAACATTCTTTCTGTAAACCCCAAATTTTTATTTATTTATTTATTTATTTATTTATTT  
ATTTATTTATTTATTTATTTTGGAGACAGGGTGTTCCTCTGTACCTAGGCTGGAGTGCAGTGGCGTGATCTCCGCTCACTGCAACCTCTGCCTCCTGGGT  
TCATGTGATTCTCTTGCCCTCAGCCTCCTGAGTAGCGAGTAGCTGGGACTACAGGCATGCAGCACCACACCCAGCTAATTTTTGTATTTTTGGTGGAGA  
CGGGGTTTCACTGTGTTGGCCATGCTGTTCTCTAACTCCTGGCTTCAAGTGATCTGCCACCTTGGCCTCCCAAATTGCTGGGATTATAGGAGTGAACCTA  
CTGCACCCGGCCTGACCCCAAATTTTTAAACAAAAACAACCAAACACACCCAAACACAAATCGTCGACCTGCAGGCATGCAAGCTTGGCACTGGCCGT  
CGTTTTACAACGTCGTGACTGGGAAAACCCTGGCGTT

117

GGTGTTTTGGGCACAAATTCTGACTTCAAATCCAGCGGCCTTTTTCTCACATAATACATGGAGGAAAAACGTCTGTGGCCTTGAATTTCTTTCTCTCAT  
AAGTCTTACTGCCACATGACCTCAAATGAACCAACCATGCATCATATCTCCCTTTTTCGTAGTTCTAACCAGACCCTCTCAGCCAAAGAAGATCCCATT  
CCCAGCTGGAAATGCTGTCTCGGAGCAGGAATGAAGAGCCTCTCTCATTGGAATTGCCCATGAGGACAACACCCCCC

118

TTTTTTGTGGACTGTCACCAAACAGATCTCCTGGCATGTAGACCTCAGGTAAGGGGAACTAAAGACTGAACTCTGACTGCCTGTTCTTTGTTCTATGTA  
TTTTTTGAGGGACCTAGAGGAGGTCATGCTCACGAGCCACAGCTAACATTCTTTCTGTAAACCCCAAATTTTTATTTATTTATTTATTTATTTATTTATTT  
ATTTATTTATTTATTTATTTTGGAGACAGGGTGTTCCTCTGTACCTAGGCTGGAGTGCAGTGGCGTGATCTCCGCTCACTGCAACCTCTGCCTCCTGGGT  
TCATGTGATTCTCTTGCCCTCAGCCTCCTGAGTAGCGAGTAGCTGGGACTACAGGCATGCAGCACCACACCCAGCTAATTTTTGTATTTTTGGTGGAGA  
CGGGGTTTCACTGTGTTGGCCATGCTGTTCTCTAACTCCTGGCTTCAAGTGATCTGCCACCTTGGCCTCCCAAATTGCTGGGATTATAGGAGTGAACCTA  
CTGCACCCGGCCTGACCCCAAATTTTTAAACAAAAACAACCAAACACACCCAAACACAAATCGTCGACCTGCAGGCATGCAAGCTTGGCACTGGCCGT  
CGTTTTACAACGTCGTGACTGGG

119

GTGTTTTAGCCCTAGCCAGTCAGTTGGCCAAAGTCTACCTCTGACTCAGCACATATATAATAAATGCTCAATGCTTAATGAGCATGACCACCACAAATAA  
ATGAGGGTCAATGAACAGAGCATTAAAGTATAGGTGAGCAAGTCTTAGTTCTTCAGGATAAATATTACACTAAAAGAAAATAACCTGTTTCTTCCACTT  
AAAAAATGTGATGTAGTAAGTGTAGCCATAAAGATAAATGAATTAGTAAATATTGTAATCACAGCTATGACTAATTTTATAGCACTTCTAGATTACAAAA  
ATTTTTCCCAATAGAATATATAC

120

TGGTGTGTTTAAGAAAGTAAAATGGAAAGCGGGGGTAGGGTGAGGGGTCATTCTGATGATATAGTTTTAGGACCTGGATGTAGCCATACCTGTAGCTGT  
CAACTCTGTGCCATAGTACTGCTTTTTTTTTTTTTTTCCTTCAAATTTAAATACTTTCTAAAGGCAAGGCTTGCTATGTTGCTTAGGCTGGTTTTGAAAA  
GTATTTAAATTTGAAGAATCGTCGACCTGCAGGCATGCAAGCTTGGCACTGGCCGTCGTTTTACAACGTCGTGACTGGGAAAACCCTGGCGTT

121

GTGTTTTAGCCCTAGCCAGTCAGTTGGCCAAAGTCTACCTCTGACTCAGCACATATATAATAAATGCTCAATGCTTAATGAGCATGACCACCACAAATAA  
ATGAGGGTCAATGAACAGAGCATTAAAGTATAGGTGAGCAAGTCTTAGTTCTTCAGGATAAATATTACACTAAAAGAAAATAACCTGTTTCTTCCACTT  
AAAAAATGTGATGTAGTAAGTGTAGCCATAAAGATAAATGAATTAGTAAATATTGTAATCACAGCTATGACTAATTTTATAGCACTTCTAGATTACAAAA  
ATTTTTCCCAATAGAATATATACACCAAAAACCAAACACACCCAACACAAATCGTCGACCTGCAGGCATGCAAGCTTGGCACTGGCCGTCGTTTTACAA  
CGTCGTGACTGGGAAAACCCTGGCGTT

122

TGGTGTGTTTAAGAAAGTAAAATGGAAAGCGGGGGTAGGGTGAGGGGTCATTCTGATGATATAGTTTTAGGACCTGGATGTAGCCATACCTGTAGCTGT  
CAACTCTGTGCCATAGTACTGCTTTTTTTTTTTTTTTCCTTCAAATTTAAATACTTTCTAAAGGCAAGGCTTGCTATGTTGCTTAGGCTGGTTTTGAAAA  
GTATTTAAATTTGAAGAATCGTCGACCTGCAGGCATGCAAGCTTGGCACTGGCCGTCGTTTTACAACGTCGTGACTGGGAAAACCCTGGCGTT

123

TGGTGTGTTTAAGAAAGTAAAATGGAAAGCGGGGGTAGGGTGAGGGGTCATTCTGATGATATAGTTTTAGGACCTGGATGTAGCCATACCTGTAGCTGT  
CAACTCTGTGCCATAGTACTGCTTTTTTTTTTTTTTTCCTTCAAATTTAAATACTTTCTAAAGGCAAGGCTTGCTATGTTGCTTAGGCTGGTTTTGAAAA  
GTATTTAAATTTGAAGAATCGTCGACCTGCAGGCATGCAAGCTTGGCACTGGCCGTCGTTTTACAACGTCGTGACTGGGAAAACCCTGGCGTT

124

GTGTTTTAGCCCTAGCCAGTCAGTTGGCCAAAGTCTACCTCTGACTCAGCACATATATAATAAATGCTCAATGCTTAATGAGCATGACCACCACAAATAA  
ATGAGGGTCAATGAACAGAGCATTAAAGTATAGGTGAGCAAGTCTTAGTTCTTCAGGATAAATATTACACTAAAAGAAAATAACCTGTTTCTTCCACTT  
AAAAAATGTGATGTAGTAAGTGTAGCCATAAAGATAAATGAATTAGTAAATATTGTAATCACAGCTATGACTAATTTTATAGCACTTCTAGATTACAAAA

ATTTTTCCCAATAGAATATATACACCAAAAACCAAACACACCCAACACAAATCGTCGACCTGCAGGCATGCAAGCTTGGCACTGGCCGTCGTTTTACAA  
CGTCGTGACTGGGAAAACCCTGGCGTT

125

GTGTTTTAGCCCTAGCCAGTCAGTTGGCCAAAGTCTACCTCTGACTCAGCACATATATAATAAATGCTCAATGCTTAATGAGCATGACCACCACAAATAA  
ATGAGGGTCAATGAACAGAGCATTAAGTATAGGTGAGCAAGTCTTAGTTCTTCAGGATAAATATTACACTAAAAGAAAATAACCTGTTTCTTCCACTT  
AAAAAATGTGATGTAGTAAGTGTAGCCATAAAGATAAATGAATTAGTAAATATTGTAATCACAGCTATGACTAATTTTATAGCACTTCTAGATTACAAAA  
ATTTTTCCCAATAGAATATATACACCAAAAACCAAACACACCCAACACAAATCGTCGACCTGCAGGCATGCAAGCTTGGCACTGGCCGTCGTTTTACAA  
CGTCGTGACTGGGAAAACCCTGGCGTT

126

GACATGACATGATTACGATTCGAGCTCGGTACCCGGGGATCCTCTAGAGATTTGTGTTGGGTGTGTTTGGGTTGTTGGGCCATGACGATCCTTTGGGGC  
CAGTCTACCTCTGACTCCTCACATATATAATAAATGCTCTGTGTTTAATGAGCATGACCACCACAAATAAATGAGGGTCAAAGAACAGAGCATTAAGTA  
TAGGTCAGCAAGTCTTAGTTCTTCAGGATAAATATTACACTAAAAGAAAATAACCTGTTTCTTCCACTTAAAAAATGTGATGTAATAAGTGTAGCCATA  
AAGATAAATGAATTAGTAAATATTGTCATCACTGCTATGACTAATTTTATAGCACTTCTAGATTACAAAAAATTTTTCCCAATAGAATATATACACCAAAA  
CCAAACACACCCAACACA

127

TGGTGTGTTTAAGAAAGTAAAATGGAAAGCGGGGTAGGGTGAGGGGTCATTCTGATGATATAGTTTTAGGACCTGGATGTAGCCATACCTGTAGCTGT  
CAACTCTGTGCCATAGTACTGCTTTTTTTTTTTTTTTCCTTCAAATTTAAATACTTTCTAAAGGCAAGGTCTTGCTATGTTGCTTAGGCTGGTTTTGAAAA  
GTATTTAAATTTGAAGAATCGTCGACCTGCAGGCATGCAAGCTTGGCACTGGCCGTCGTTTTACAACGTCGTGACTGGGAAAACCCTGGCGTT

128 号

TGTTTTTTTTGATAGGAAGAATTACTTTTTAAGAGAAAGAGCTACGCACCATTTGGGTAGGATCTGAGGATTTACATAATTTCAATATATAAACAGCCTATA  
TTCATCTCATCAAGAATAGATATAGTCTGAGAAAAAAGAACAGAACTCAGTAGTCTGCAGTTTAACTGTTAGATTCAGTATCTTTGCCCATGTATAGC  
CAACAACCCCAAACACACCCAACACAAATCGTCGACCTGCAGGCATGCAAGCTTGGCACTGGCCGTCGTTTTACAACGTCGTGACTGGGAAAACCC  
TGCGTT

129

TGTGTTGGGTGTGTTTGGTGGTTTTGGTAAAGACAGGGTTTCACCCTGTTGGCTTGCTGGTCTCTAACTCCTGGCCTCAAATGATCCTCCTGCCCCACC

AACGCCAACAAAGTTGACGGCTTTCGGTATGGATACACCCGGGGACTAAAACCATATCAATAGACTGACCCCTCACAGTTGCCCCGGTTTCATTTTTATT  
TCTTAAACCCCCCCCCAAAAACAGCCACCACA

130

GGTTTTGTTATATTCCATTCCATTCCATTCCATTCCATTCCATTCCATTCCATTTCATTCCATTCCATTGCATTCCATTCTCCTCTCACGTTGTTTCCATT  
CCGTTCCATTAGTTTCCATTCCATTCCATTCTTTCCATTCAACCCAACCCCAAACACACCCAAC  
ACAAATCGTCGACCTGCAGGCATGCAAGCTTGGCACTGGCCGTCGTTTTACAACGTCGTGACTGGGAAAACCCTGGCGTT

131

CTTGACATGATTACGATTTCGAGCTCGGTACCCGGGGATCCTCTAGAGATGTGTTGGGTGTGTTTGGGTGGTTGTTGAATACAGTCAATAGACTTTTGGAT  
GTTTTACAGGGCTGAAGCTTTGTGCAGGGTCTTTATTTATATCTGACTTCTGGTCTTTGGTTTTACAGCAGGGATATGTTAGTGAGGCATTTTTGGTGTA  
AAACCAAACACACCCAACACAAATCGTCGACCTGCAGGCATGCAAGCTTGGCACTGGCCGTCGTTTTACAACGTCGTGACTGGGAAAACCCTGGCGT  
TACCCAACCTAA

132

AATTTGACATGATTACGATTTCGAGCTCGGTACCCGGGGATCCTCTAGAGATTTGTGTTGGGTGTGTTTGGTCATTCACCTAAATAAGCCCTGATTATTCCA  
ACTCTGTATGACCGAGCAGTCAGAAAAAAGAAATGTCAGTTGTGGCTGGAGAACCTGTTGCTAAAATGCCAGGATCCACGGAAGAAAGGAGACACA  
TGGGATCAACACCACCACCCAACACACCCAACACAAATCGTCGACCTGCAGGCATGCAAGCTTGGCACTGGCCGTCGTTTTACAACGTCGTGACT  
GGGAAAACCCTGGCGTT

133

GGCCCTTGACTGATTACGATTTCGAGCTCGGTACCCGGGGATCCTCTAGAGATTTGTGTTGGGTGTGTTTGGGTGGGGGTTTGTAGTTGGCTACACTGGTGT  
TCCCAGGGTCTCCTTCTCTGTATGGTTCTGAGTTAAAGTTGGGCAAAGAAGACTTGCATGAGATTTGGAAGAGGAGTCATTTCTCTGAAAGTCATTTGAT  
GGTAAGATGAGATGACCAACAGACGCAGAGTTGCCAGCAGTTTCCAGCTTGTTCTCACTCTCCCTCTCTGTGACCAGTCTGGCCCCACTGACCAACA  
GTGGCCCCCTCCCAACACCAAATTATTGGTTGTGAATTGACACAGAGGGTAGCTACCTAGAGGCAACAGCTTCCCATGGATGCCTCTGCCTCAGTGACT  
AGATAGAGTTGGCTCTTTGGATGGACAGGTGGGTGACTCTTTCTCTGATTCTCTAACTTCCTGTTCTGGATCTTCAGTTCCCCAGCTCTTTTGTAATTCT  
AACTCTTTAATCTATGGAATTAATCTCTTATCCCATCGCAGTTACAGTGACTCTGTTGCTCCCCTGCCTAAGTGTGCCAAGGTTAGGACAAGGTACGTA  
AGAACAGCAGAGTCATTCAGGAGCCAAACCCACCAAACACACCCAACACAAATCGTCGACCTGCAGGCATGCAAGCTTGGCACTGGCCGTCGTTTT  
ACAACGTCGTGACTGGGAAAACCCTGGCGTTACCCAACCTAA

134

GGCCATGACATGATTACGATTCGAGCTCGGTACCCGGGGATCCTCTAGAGATTTGTGTTGGGTGTGTTTGGGTGGGGGTTTAGTTGGCTACACTGGTGT  
TCCCAGGGTCTCCTTCTCTGTATGGTTCTGAGTTAAAGTTGGGCAAAAGAACTTGCATGAGATTTGGAAGAGGAGTCATTTCTCTGAGAGTCATTTGAT  
GGTAAGATGAGATGACCAACAGACGCAGAGTTGCCAGCAGTTTCCAGCTTGTTCTCACTCTCCCTCTCTGTGACCAGTCTGGCCCCACTGACCAACA  
GTGGCCCCCTCCCCAACACCAAATTATTGGTTGTGAATTGACACAGAGGGTAGCTACCTAGAGGCAACAGCTTCCCATGGATGCCTCTGCCTCAGTGACT  
AGATAGAGTTGGCTCTTTGGATGGACAGGTGGGTGACTCTTTCTCTGATTCTCTAACTTCCTGTTCTGGATCTTCAGTTCCCCAGCTCTTTTGTAATTCT  
AACTCTTTAATCTATGGAATTAATCTCTTATCCCATCGCAGTTACAGTGACTCTGTTGCTCCCCTGCCTAAGTGTGCCAAGGTTAGGACAAGGTACGTA  
AGAACAGCAGAGTCATTCAGGAGCCAAACCCACCAAACACACCCAAACACAAATCGTCGACCTGCAGGCATGCAAGCTTGGCACTGGCCGTCGTTTT  
ACAACGTCGTGACTGGGAAAACCCTGGCGTT

135

TGTTAACCTATGTACTTGGGAGGCTGAGGCAGGACAATCGCCTGAAGCCAGGAGGTTGTGGTTGCCATGAGCCAGGACCACACCACTGTCTTCTCTAT  
CCTGGGTGACAGAGCAAGACTCCGTCACAAAAAAAAAAAAAAAAAGACAAAAGCAAAGTGGGCAGGCCTCCAGACCATGCACATGGACCTGTACCA  
AGGTGTTCCCCCCCCCTAACTTGACCAAACACACCCAAACACAAATCGGGCGACCTGCAGGCATGCAAGCTTGGCACTGGCCGTCGTTTTACAACGTCGTG  
ACTGGGAAAACCCTGGCGTT

136

TTGGTGTTCCTCTTAAGTGATCTTTCTTCCTCTAGATCTCTCTTCAGCTTTTAAAGTTATTTCAAGCTTCTGTAACCCCGACAGGAGACTGCTGCTTGGATA  
AGCATATCAGCTGCATGGTTAAACTATTTGTTCTGTCTTTCAACTGAGCTGTCAATACACTCTTTGAAAAATTTGAAGGGAAGAGTATAGTTCCACTTAC  
TATTTCTTTATAAGTAACCAAGAAACAACGTAACCTTCATATTAATCTTCGGGAAGGAAGGATTTTTTATTCTATGAATTTTGTTGGTAGGATTTTTTGTGGT  
AGGATTTCTGGCCTTATTGTAATTTTATGCCTTGGTATTTAAAGGCAAAGTCCAATCCACTGCTGATATCTTTGGTGTCTAAGAAGGACATCTGTTCAAAG  
AAAAGGCCGTACCATTGCCAGAAGCCACTGTGAGTCACACCGATGAAAATAAAGCAAGAGCAGAAAAAAGGTGAGCAGGAGGGAAGACTTAACG  
CAGGAGCATTGATCTGCAGCATTTTAATAATTCATCCGGAACGCAGACGGCAGTACTGTTCCCTTCCACGTTTCATATTGAACAACCTCAAACAGAAAGT  
GGAAAGAACATTGCAGTGAACACCCAA

137

GTGTTTGGGTGGTTTGAATATTTTCATTACAAATCTTCTCTGACATTGTTTAAAATATTTTCATTACAAATCTTCTCTGACATTTGTAACATTTTCT  
ATTTGTTTACAAATTTTATTTTTAAAATTAATTTAAAGCCAATAGTCACTGCAGAGCTTAGAATAAATTTTCATCATTTTTCTTTATACACAAAAACCAA  
ACACACCCAACACACGTCTATAATCTCAGCTCACTGCAACCTCCGCCTCTGAGTTCATGGAGTTCTCATGCCTCAGCCTCCTGAGTAGCTGGGATTAT  
AGACATACACCACCATAACCCGGCTAATTTTTATATTTTTAGTAGATGCAGGGTTTACCATGTTGGCCAGGCTGGTCTCAAACCTCCTGACCTCAAGATCC



ACCTACCTTGGCCTCCCAAAGTGCTGGGATGATAGGCATGACCCCCCCCCAAACACACCCAACACAAATCGTCGACCTGCAGGCATGCAAGCTTGGC  
ACTGGCCGTCGTTTTACAACGTCGTGACTGGGAAAACCCTGGCGTT

138

TGTTTGGTTGCATTGTGACTGGAAAGTAGGCCTGGAAAATGGACACAGATTGGCCAGGTGCAGTGGCTCATGCCTGTAATCCCAGTACTTTGAAAGGC  
CAAGGCTCTTAAGGTCCTCAAGGATCACTTGAGATCAGGAGTTCAAGACCAGCCTGGCCAACATGGTGAAACCCTGTCTCTACTAAAAATACAAAAAT  
TAGCTAGGCATCATGGCAAGCACTTGTAGTCCCAGCTACTCAGGAGGCTGATGCAGGAGAATCACTCGAACCCGGGAAGCAGAGGTTGCAGTGAGCC  
GAGATCAAGCCACTGCACTCCACCCCATCTCAAAAAACACCCAACACACCCAACACAAATCGTCGACCTGCAGGCATGCAAGCTTGGCACTGGCCG  
TCGTTTTACAACGTCGTGACTGGGAAAACCCTGGCGTT

139

TGTTGTGGTTCCTATGAACTCTTGGTGTGCTGACCTAAACACATTTGCTGATCCTGAAAGGCTGAGAACCAGATACTGGAACATTGCAAGTTTACCAAT  
GGAGAGATAAGAGATGTTGGCGATCTCTGGGTGGTCAGCCTGGGTAAATTCAGTCAATTATCTGCCTCATTGGACAATCGTCAAATGCAAAAGATACAT  
TCAATTTGATTTGGTAGCTTTTCTACCCCCAAAAAACCAAACACACCCAACACAAATCGTCGACCTGCAGGCATGCAAGCTTGGCACTGGCCGTCGTT  
TTACAACGTCGTGACTGGGAAAACCCTGGCGTT

140

TTTATGCTCATGAAAGATATCTGGGCCAGAATTATAGAGGTGGTGTACCGCATTTTCAGTGCTGGTTGAAGACCCCAAAGCCAATGAAAATTTCCCCAC  
ATGCACTGAGTAGAAAGCAGAGATATCCTGGGATAGAATCTTCAGGACTCCAGTATTCAAGGAGCAGCTAGATAAGGAGCCAATAAAGAAAGGTCTGA  
GGAGGCCACAGCCCAGCCTCTTCCACCTTCTTTTTCCATAATAATCTCCATCTTCTTATTTCTACTTCTTTCTGTCCCCCAACCCAAACACACCCAA  
CACAAATCGTCGACCTGCAGGCATGCAAGCTTGGCACTGGCCGTCGTTTTACAACGTCGTGACTGGGAAAACCCTGGCGTT

141

TTGTTGGGTGATCGTGTTCAAATAATAAAATTGGTGCCTGTCTAATGGCAGAACCAAATCTAGTTGCAGAATGCATTCACAGTATGCAAAAAGCCGTC  
TCAATTCCTGTCACGGTAAACATCGTATTGGAATTGATGATATGCAGTCTTATGAAGAAATGCTGCACTTCGTGATACTGTAGCAGCTACAGGATGTA  
CACATTTTATCGTGCATGCACGCATTGCGATCTTGCAAGGTTTGTACCCAAAAAAAACCACCCAAACACACCCAACACAAATCGTCGACCTGCAGGC  
ATGCAAGCTTGGCACTGGCCGTCGTTTTACAACGTCGTGACTGGGAAAACCCTGGCGTT

142

TGTTGTGGTTCCTATGAACTCTTGGTGTGCTGACCTAAACACATTTGCTGATCCTGAAAGGCTGAGAACCAGATACTGGAACATTGCAAGTTTACCAAT  
GGAGAGATAAGAGATGTTGGCGATCTCTGGGTGGTCAGCCTGGGTAAATTCAGTCAATTATCTGCCTCATTGGACAATCGTCAAATGCAAAAGATACAT

TCAATTTGATTTGGTAGCTTTTCTACCCCCAAAAACCAAACACACCCCAACACAAATCGTTCGACCTGCAGGCATGCAAGCTTGGCACTGGCCGTCGTT  
TTACAACGTCGTGACTGGGAAAACCCTGGCGTT

143

GGTGTGTGTTAACCTAGGTACTTGGGAGGCTGAGGCAGGAGAATCGCCTGAAGCCAGGAGGTTGTGGTTGCAGTGAGCCAAGACCACACCACTGTAT  
TCTCTAGCCTGGGTGACAGAGCAAGACTCCGTCTCAAAAAAAAAAAAAAAAAAGACAAAAGCAAAGCTGGGCAGGCAGCCAGACCATGCACATGGAGCT  
GTACCAAGGTGTTCCCCAGCCTAACTTGACCAAACACACCCCAACACAAATCGTTCGACCTGCAGGCATGCAAGCTTGGCACTGGCCGTCGTTTTACAAC  
GTCGTGACTGGGAAAACCCTGGCGTT

144

TGTTCCCTCTTAAGTGATCTTTCTTCCTCTAGATCTCTCTTCACCTTTTAAGTTAGTTCAAGCTTCTGTAACCACAACAGGAGACTGCTGCTTGGATAAGC  
ATATCAGCTGCATGGTTAAACTATTTGTTCTGTCTTTCAACTGAGCTGTCAATACACTCTTTGAAAAATTTGAAGGGAAGAGTATAGTTCCACTTACTATT  
TCTTTATAAGTAACCAAGAAACAACGTAACCTTTCATATTAATCTTCGGGAAGGAAGGATTTTTTATTCTATGAATTTTGTGGTAGGATTTTTTGTGGTAGG  
ATTTCTGGCCTTATTGTAATTTTATGCCTTGGTATTTAAAGGCAAAGTCCAATCCACTGCTGATATCTTTGGTGTCTGAAGAAGGAGATCTGTTCAAAGAA  
AAAGCCGTAGCATTGCCAGAAGCCACTGTGAGTCAGACAGATGAAAATAAAGCAAGAGCAGAAAAAAGGTGAGCAGGAGGGAAGACTTAAACGCA  
GGAGCATTGATCTGCAGCATTTTAATAATTCATCCGGAACGCAGAGGGAAGTACTGTTCCCTTCCACGTTTCATATTGAAGAACTTCAAACAGAAAGTGG  
AAAGAACATTGCAGTGAACACCCAAACACACCCCAACACAAATCGTTCGACCTGCAGGCATGCAAGCTTGGCACTGGCCGTCGTTTTACAACGTCGTGA  
CTGGGAAAACCCTGGCGTT

145

TTTTGGTGGGAAATGGGCAACTCCAGTCACACTCAGAAAATGGAAGTGAAAATTGGGGCCAGGATCATCTTAGAAGCACCAACAAAAGCATATTGGT  
AAAATACCCAACAATAAAGATCACAAAATTAGCCACACATGGGATAATCACAAACCCCAAACACACCCCAACACAAATCGTTCGACCTGCAGGCATGCAA  
GCTTGGCACTGGCCGTCGTTTTACAACGTCGTGACTGGGAAAACCCTGGCGTT

146

TGTTCCCTCTTAAGTGATCTTTCTTCCTCTAGATCTCTCTTCACCTTTTAAGTTAGTTCAAGCTTCTGTAACCACAACAGGAGACTGCTGCTTGGATAAGC  
ATATCAGCTGCATGGTTAAACTATTTGTTCTGTCTTTCAACTGAGCTGTCAATACACTCTTTGAAAAATTTGAAGGGAAGAGTATAGTTCCACTTACTATT  
TCTTTATAAGTAACCAAGAAACAACGTAACCTTTCATATTAATCTTCGGGAAGGAAGGATTTTTTATTCTATGAATTTTGTGGTAGGATTTTTTGTGGTAGG  
ATTTCTGGCCTTATTGTAATTTTATGCCTTGGTATTTAAAGGCAAAGTCCAATCCACTGCTGATATCTTTGGTGTCTGAAGAAGGAGATCTGTTCAAAGAA  
AAAGCCGTAGCATTGCCAGAAGCCACTGTGAGTCAGACAGATGAAAATAAAGCAAGAGCAGAAAAAAGGTGAGCAGGAGGGAAGACTTAAACGCA

GGAGCATTGATCTGCAGCATTTTAATAATTCATCCGGAACGCAGAGGGAAGTACTGTTCCCTTCCACGTTTCATATTGAAGAACTTCAAACAGAAAGTGG  
AAAGAACATTGCAGTGAACACCCAAACACACCCAAACACAAATCGTCGACCTGCAGGCATGCAAGCTTGGCACTGGCCGTCGTTTTACAACGTCGTGA  
CTGGGAAAACCTGGCGTT

147

TCAAATTATCAGGCTTAAGGATCTCTTAGGAAATCATATTTTCCCTAAGTAAAGCTCTAGCTAGGGAATATTTTGGATGAAAAATTCCAAAAAAGATATTGT  
TTACTCATTATATAATAGGGCTGGTAAAAGCCAAAAATATTGTAGGAATAAGTATGTTACCATCTCATAAAGACTCAAGTACTGCTTGCCTTTCTTGGAT  
CCCCAGGCATAAATCAAATCATAAATATTTTCTGACAAGTTCTTAAATCTGTGACTTATAATGAATAGTACAGTTCTACTAGTCTTGCTAAAACATTAG  
TAATTAACACAGATTTACAGTATAAGGTCACCTATTGAAATGCTATATTAACAGCTCCATATTAACAAAAAACCCAAACACCAAACACACCCAAACACAA  
ATCGTCGACCTGCAGGCATGCAAGCTTGGCACTGGCCGTCGTTTTACAACGTCGTGACTGGGAAAACCTGGCGTT

148

TTTTTGTGTTTCTGGTAGAATGATTTACATTCCTTTGGGCATATACCCAGTCATGGGATTGCTGGGCTGAACAGCAATTCTGTTTTATCTTCTTTGAGAAA  
TCTCCAAACTGCTTCCCACCGCAGCTGAACTAGTTTATATTCCCACCAGCAGTATATAAGCATTCCCATTCTCCACAGCCTTGCCAGCATCTCTTCTTTA  
TGGACTTTCTAATAACAACCACTCTGACTGTTGTGAGATGGTCTCTCATTGTGGTTTTGATTTGCATTTCTCTAAGGATTAGTGATGTTGAGCACATTTCT  
GAATGAACCATCCAGCTTGGCTTCATTGTTTTTTTATTGTTTACCTGAAGAACTTAAAGAAAGAAGTAAAAGAGATATATTTGCCCTTTGATTTATGAAT  
GAATGATGATGTCTTAGATCTCAAATATTTGCTAAAAATGTAGATACCTTTAGAGTACTTCTATACAGAAACCAAATATTAATAAATAACAAATCTGCTTC  
CTTCATTAGTATCTCATTCTCCAAGTTTGACATTTGAATCCTAATTCCTAAAAATTGAATGTTTTGGTAAATCATAGTCTGTTCTTTAGACTACATTTCTTTC  
CTTCTTAAGAAATAATTGCATATCAATATAGCTATCTGGATGTATTTATCTGTGTAAAGAATGTGTTAGAAGTGTAACCAGATTGCATTTATAAATATTATTG  
TAACACCACCACCAAACACACCCAAACACACTTGTGAATCTTCAAATCTATCCAAATGTCCACTTGCAGATTCAACAAAAAGTGTTTTTTCAGAAGTCTGCT  
CTATCAAAGAAAGATCCACCTCTGTTAGCTGAGTTCAGACATCACAACAAGTTTATGAGAATGCTTCTGTCTAGTTTTTTATTTGAAGATATTTCTTTT  
CTCACCATAGAGCTGAAAGCTGTCCTAATGTTCACTTCCAGTTACTACAGAAAGAGTGTTTTCAAACCTGCTGTACGAAAGGGAATGTTCAACTCTGTG  
ACTTGAATGCA

149

ACAATGACATGATTACGATTCGAGCTCGGTACCCGGGGATCCTCTAGAGATTTGTGTTGGGTGTGTTTGGGTTTTGACTCGGTCCAATTCATCCCTGCTT  
TTATAATTTCTTTTTTTTTGAAGGTGGAGAGGCGGGAAGGTCCCCAGTGTGTTTCATGGGAACGCAGGGCATGCCTCACTGCCTTTGGACTTGGCCGCTCC  
CTGGGTTGGGAGGGAGACCTCTCTGACAGATGCCACCTTATGTTCTCAGCGACATTTCCCTCACCATTCCCTCTACCCCTTTTTTTTTAAAAA  
AGAGACATAACTCATATACTGTAAAATTCACCATGTTACGGTGCAGAGTTGGGTGGGTTTCAGCGGATCCACAGGGCAGTGCAGCTGTCACTTCTCTCT

ATGTCTGGAACATTCCCATCACCCCAGAAAGGAACCCTGTTCTCTTAAGCAGCGTCTACCCATTTTCCCCTCCCCATAATCCTGGCAACCACAAATCC  
ACTTTCGGTCTCCATGGATTTGCCTCTCGTTGACATTTACATAAGCGGGATCATTCTATAAGTGAGCTTTTGTGTCTGGCTTCTTCCACTCAGCATCGTG  
TTCTCAAGGTTTCATCAGTTTGACCAGGTGTCAGTGCTTCCCTCCTTTTTCTGGCTGAGCAATATCCGTTGTGATTTAAGGGAACATGAATACACAGCAT  
TTTCTTTATTTACTCCTCCATTGATGGACATTGGGTTGCTCCCACTTTTTGGCTCTTATGAATAATGCTGTTATCCCTATTTGTATTACATTTTTAAATGAA  
CACAGGTGTCAGTATCTCTGTGCACATTGTAGTGTGACATCTGGTAACTTCGTGTTTACATTTCCATGAAGTCTCCACCAAAGCTGCACCATTTTTCCA  
TTCCCACCAACAGGCGGGAGAGCTCCCAAAACCAAACACACCACACAAATCGTCGACCTGCAGCATGCAAGCTTGGCACTGGCGTCGTTTACAACGT  
CGTGACTGGAAACACTGTCGTACCACATCATCGCGTGTAGCACATCTCCCTTCTCAGCTGCGTATAGCGAGAGACGG

150

GGGATTGGGAGATGGAAGATAGACGAGACAAGAGACCTAGAATCTATTTAGACTCTGACAGTGTCCCAGACACTGGAATGAGGATCTGAAGTAGTAG  
GAACAACGGGACAGAGACATTCGGTAATATGTAAGAGCTTCAGCTGGTGTATGTAATATGTAAGAGCCTGGTGATCAGTTTAATGTGACAGAGAAGAG  
GGAGGAAGAAATATCAGAATGGGATTTCCATTTCAAGAATATAAGTACTAGGCTCATCACCACCACATGAGATAGAAAACATACACACACACACAC  
ACACTCACCCACACACCAAACACACCCAACACAAATCGTCGACCTGCAGGCATGCAAGCTTGGCACTGGCCGTCGTTTTACAACGTCGTGACTGG  
GAAAACCCTGGCGTT

151

CTCAAAAATAAATAGCAAAGAAAGACAAGTTCTTCCCAAGCAAAAACACAACCCAAACACACCCAACACAAATCGTCGACCTGCAGGCATGCAAGC  
TTGGCACTGGCCGTCGTTTTACAACGTCGTGACTGGGAAAACCCTGGCGTT

152

GCGATGACATGATTACGATTCGAGCTCGGTACCCGGGGATCCTCTAGAGATTTGTGTTGGGTGTGTTTGGGGTTTGTGTCATCATTAAAGTTT  
AGAGAA  
CCCCAACATTGAAGTAATAACAGCAAAGAGCTTTCCAAAATTAATGATAGACACCAAATCACAGATACAGAAAGTTT  
AGAGA  
ACCCCAAGCACAACA  
AAAACACCAAACACACCCAACACAAATCGTCGACCTGCAGGCATGCAAGCTTGGCACTGGCCGTCGTTTTACAACGTCGTGACTGGGAAAACCCTGG  
CGTT

153

GCATGACATGATTACGATTCGAGCTCGGTACCCGGGGATCCTCTAGAGATTTGTGTTGGGTGTGTTTGGTGGTTGTTGGAATGGGAATATCTT  
CACATA  
AAA  
ACTAGACAGAAACATTCTCAGAACTTCTTTGTGATGTGTGCATTGAACTCACAGGTTTGAACCTTTCTTTT  
GATGGAGCAGTTTTTAA  
ACTTT  
TTTTTATTATTACTTTGTTTTAGCGTACATGTGCATATTGTGCAGGTTTGTACATATCTATACATGTGCTATGTTGGTGTGCTGCACCC  
ACTA  
ACTCGTC  
ATCTAGCATTAGGTATATCCCCGATGCTATCCCTCCCCAACACACCCAACACAAATCGTCGACCTGCAGGCATGCAAGCTTGGCACTGGCCGTCGTT

TTACAACGTCGTGACTGGGAAAACCCTGGCGTT

154

GTCAATCACTGCTTTTAAATTCTTAATACTATACTTTTTGAATAAAGGGCTCTGCTTTTTCATTTTGCCTGGTCCCACAAATTATGGAGCCAGTCCTGG  
TTAGGGCAGTGGTTGTGGGAATGGAGGAATGATAAGGATCCATAGGTTGTTAGGAGGTCAAATAGGACTTATTTATTGATTCATTGGATGAAGAGTTAG  
GAAGAAGGAGGAAGACTAGGATAACTTTCTGTTTTCCAGACAGATGGTGGAGCTCTTAATAAGATAGGAAATGTGGGAGGAGGAGCAGGCTTAGGGAAA  
GGGGTAAATAATGAATTCAGTTTTAAACTAACAGACTTGAAGTACTTGTGGGGTCTGCTAGGATCCCAGACTCTCTAACCCCAATTTCTTCCAGTCCCTA  
TCTCCTTCCCCACATGTGACCCAGCCCCTGCTTTTCTCTACCCACTCTTCTATAGGGCCTCTCTTGTCCCGCATCCTTCTGAATCCTCCCAAACACACCC  
AA

155

TTGTGTGTCAAAGGAAATGTCTTCAAATAAGAACTAGACAGAAGCATTCTCAGAAACTTATTTGTGATGTGTGCCCTCAACTAACACAGTTGAACCTTT  
CTTTTGACACAGCAGTTTGGAAACACTCTTTTTGTAGAATCTACAAGTGGATATTTTGAGAGCATTGAAAATTTTCGTTGGAAACGGGAAAAACCCCAA  
ACACACCCAACACAAATCGTCGACCTGCAGGCATGCAAGCTTGGCACTGGCCGTCGTTTTACAACGTCGTGACTGGGAAAACCCTGGCGTT

156

GCGATGACATGATTACGATTCGAGCTCGGTACCCGGGGATCCTCTAGAGATTTGTGTTGGGTGTGTTTGGTTTTATGCTCATGAAAGATATCTGGGCCAG  
AATTATAGAGGTGGTGTACCGCATTTCAAGTGTGGTTGAAGACCCCAAAGCCAATGAAAATTTCCCCACATGCACTGAGTAGAAAGCAGAGATATCC  
TGGGATAGAATCTTCAGGACTCCAGTATTCAAGGAGCAGCTAGATAAGGAGCCAATAAAGAAAGGTCTGAGGAGGCCACAGCCAGCCTCTTCCAC  
CTTCTTTTTCCATAATAATCTCCATCTTCTTATTTCTACTTCTTTCTCTGTCCCCAACCCAAACACACCCAACACAAATCGTCGACCTGCAGGCATGCA  
AGCTTGGCACTGGCCGTCGTTTTACAACGTCGTGACTGGGAAAACCCTGGCGTT

157

TGTTTGGTTGGTTTGTTTTTTACACAAAAGAAATGATAAATTCTTGAGGTGATGGATAATCCTATTTACTCTGATGTGATTATTATGCATTGTATAACCAGTAT  
ACCAAAATTTCTCATATACCCATAAATATATGCAACACCTACTATGTACCCATAAAAATTTAAAATTAATAATCATCTAACAAAGTAGATTAAAGCACTATAG  
TTTTGGGGTTGTATACTTACTACTGTCCCTCTCTGACCAAGACTCTCCTTGTGTACTTCCCTTTAGCATAACTGTGGAATTTGTCTCCAGGCTCTACTT  
TTCCCAAACACACCCAACACAAATCTCTAGAGGA

158

TTGGTTGGGTAGATCACCTGAGGTCAGGAGTTTGGAGACCAGCCTGGCCAACGTAGCAAACCCCGTCTCTACTAAAAATACAAAATTAGCCAGGCGTG

GTGGTGCCTGCCTGTAATCCCAGCTACTCGGGAGGGTAAGGCATGAGAATTGCTTGAACCTGGGAGACAGAGGCTGCAGTGAGCTGAGATCATACCA  
CTGCACTCCTGCCTGGGAGACAGAGCGAGACTCTGTCTCAAAAAAAAAAAAAAAAAACCAAACACACCCAACACAAATCGTCGACCTGCAGGCATGCAAG  
CTTGCCACTGGCCGTCGTTTTACAACGTCGTGACTGGGAAAACCCTGGCGTT

159

GTGGGGGGGTTTTGCACAGCCTTGTAATACTGGGGTACTCTACATGCCCTGAGCACCTGAAAAATTTAGTAAATATTTAGACGTCAACTGGTTAAAATG  
ACATTAATAAAAACCTTTTTGAACATGCTATTGGGATAGGGGATGGGTTATGGTATAAATTTACTGGCTGCTATTTAAATGAAAAGAATTACAATGCACTT  
AATGTTTATTCTAATCAAGTGATGCTAGAAGATTGAATTTAGACTGTAAATTTATAACAAAACCAAACAAACACACCCAACACAAATCGTCGACCTG  
CAGGCATGCAAGCTTGGCACTGGCCGTCGTTTTACAACGTCGTGACTGGGAAAACCCTGGCGTT

160

GGTGGTGGGGAAATTTATAAAGAAAAGAGGTTAATTGGCTCATGGTTCCGTGGGCTGTACAGGAAGCATGGCTGGGGAGACTGCGGGAAACTTCGAT  
TCATTGAAAAGGTGAAGAGGAAGGAGGCACATCTTACATGGCTGGAGCAGGAGAAAGAGTGAAGGTAGAGATTCTACACACTTTTAAACAACCACA  
TCCCATGAGAACTCACTCACTGTACACCACAACCAAACACACCCAACACAAATCGTCGACCTGCAGGCATGCAAGCTTGGCACTGGCCGTCGTTTTA  
CAACGTCGTGACTGGGAAAACCCTGGCGTT

161

GGATTGACATGATTACGATTTCGAGCTCGGTACCCGGGGATCCTCTAGAGATTTGTGTTGGGTGTGTTTGGTGTGTTTGGGTGGGTTTTTTGAGGTCAGGA  
GATCGAGGCCATCCTGGCTAACACTGTGCAACCCTGTCTCTACTAAAAATACAAAAAATTAGCCGGGCGTGGTAGCGGGTGCCTGTAGTCCCAGCTAC  
TCGGGAGGCTGAGGCAGGAGAATGGCGTGAACCCAGGAGGCGGAGCTTGCAGTGAGCCAAGATAGCCACTGCAGTCCAGCCGGGGTGACAGAGCG  
AGACTCCGTCTCAAAACAAAAAAGGGGGAAAAAACAACCAAACACACCCAACACAAATCGTCGACCTGCAGGCATGCAAGCTTGGCACTGGCCG  
TCGTTTTACAACGTCGTGACTGGGAAAACCCTGGCGTT

162

TTGTTGTTTTTTAATAAGTGAGGAACAGACTCTTGGAACACTGTTTTTTTCTAGTGGCTTACCCTGTGCTTGGAATATTTCTTGAATATTTTGTGAATATTTA  
AGTGACGTGGAGGCAACATTTATATTTGAAGTTTTATCCTCCTCAAACACACCCAACACAAATCGTCGACCTGCAGGCATGCAAGCTTGGCACTGGC  
CGTCGTTTTACAACGTCGTGACTGGGAAAACCCTGGCGTT

163

TGGGTTTTTTGACTAATAACATGGTTACATCCAGACAAGCTGATTGTAAGTCAAAAAATACTGTAAATTGAAAAGCATTTAATGCCTGGATAAACCATT  
GTAAAGTCAACAAATTGTACTTTGAACCATTGTAAACTTTCTGTAGGATAGTCACCCTACAGAAAGTAAACTCAAGTTGGCCTTGGAGTTCACCCATC

ACAGGGGAGGGCCAGAGGGCCAGTCACTTGGGCACCCATCACAGAGGAGGGCCAGTCACTGAGATGAAATGAAATAAAAATAAGAAATGTTATAGGA  
ACCCATGAGTGAAAGTCCAGAGGTGAGGTTGGCTTAAATATTAGTTAATCCAGTGATTCTTGTTCTATTTCTGTATGATTCTCTTTGCTCCTCTTCAGAT  
CCTTTCATCCTGAGGCAGGTATTATGATAGTTACAGTAGTTCCAGGTCTCATATCCAGTTAAAACAATGTCCAGGAGAAGAGTAAAGTTCTCAGCAACC  
CACCACCAAACACACCCAACACAAATCGTCGACCTGCAGGCATGCAAGCTTGGCACTGGCCGTCGTTTTACAACGTCGTGACTGGGAAAACCCTGGC  
GTT

164

TTGGTGGTTTTAAACCTCTTTACATTGAAATGAGAAGCTACTTGGAGCAAACCTGTTCCCTCTCTGCAAAAGTAAGGATAATGGTATCCACAATGTGGCCT  
CTGACCCAGCTGTACATTTCTACTTTCTTATCAGTGAAAATAATCAATTGACTTCTCTATTAACATTTTTTAAAAAACTAATGTCCAAAAACGAGAAAAT  
CTGTTTTCAGTAGCAAAACTTATTTCTGATGTGGAAAGATCGTCAATTCTTCCTAAAAACAACACCAAACACACCCAACACAAATCGTCGACCTGCAG  
GCATGCAAGCTTGGCACTGGCCGTCGTTTTACAACGTCGTGACTGGGAAAACCCTGGCGTT

165

TGGTGGTTTTTTCTAGAATGAACAACCTTGAAAATGTGTTTTCTGTGCCTATTATATGGACATTGCTTATCAAATCAGCAAGACCGTTTTCTCAAATACTT  
TTGTTTTAATAGCATAATCTAGTAATAAAGACAACACATGCTCATTGAGTAAAATTCAAACAATATAAACTATAAAAAAAAAACCAAACACACCCAAC  
ACAAATCGTCGACCTGCAGGCATGCAAGCTTGGCACTGGCCGTCGTTTTACAACGTCGTGACTGGGAAAACCCTGGCGTT

166

TGTGTCCACTCAGGGTTAAATGGATTAAGGGCGGTGCAAGATGTGCTTTGTTAAACAGATGCTTGAAGGCAGCAGGCTTGTTAAGAGTCATCACCAAT  
CCCTAATCTCAAGTAATCAGGGACACAAACACTGCGGAAGGCCTCAGGGTCCTCTGCCCTAGGAAAACCAGAGACCTTTGTTCACTTGTTTATCTGCTG  
ACCTTCCCTCCACTATTGTCCCATGACCCTGCCAACCCCAACCAAACACACCCAACACAAATCGTCGACCTGCAGGCATGCAAGCTTGGCACTGGCC  
GTCGTTTTACAACGTCGTGACTGGGAAAACCCTGGCGTT

167

GGGGTACGACGGCAGTGCAGCTTGCATGCCTGCAGGTCGACGATTTGTGTTGGGTGTGTTTTGGTTTTTGGTTTCAGATTCAAAGTCACTATGACTCTGA  
ATCTGAAATATTAATCAAACCTTCTAAGACTCGACCAAGTTCTCCACCACACCCCAAACACACCCAACACAAATCTCTAGAGGATCCCCGGGTACCGAG  
CTCGAATTCGTAATCATGGTCATAGCTGTTTCCCTGTGTGAAATTGTTATCCGCTCACAATTCACACAACATACGAGCCGGAAGCATAAAGTGTAAGCC  
TGGGGTGCCTAATGAGTGAGCTAACTCACATTAATTGCGTTGCGCTCACTGCCCGCTTTCCAGTCGGGAAACCTGTGTCGTGCCAGCTGCATTAATGAATC  
GGCCAACGCGCGGGGAGAGGGCGGTTTGCATTTGGGCGCTCTCCGCTTCCCTCGCTCACTGACTCGCTGCGCTCGGTGCTTCGGCTGCGGCGAGCGGT  
ATCAGCTCACTCAAAGGCGGTAATACGTTATCCACAGAATCAGGGGATAACGCAGGAAAGAACATGTGAGCAAAAGGCCAGCAAAAGGCCAGGAA

CCGTAAAAAGGCCGCGTTGCTGGCGTTTTTCCATAGGCTCCGCCCCCTGACGAGCATCACAAAAATCGACGCTCAAGTCAGAGGTGGCGAAACCCG  
ACAGGACTATAAAGATAACCAGGCGTTCCCCCTGGAAGCTCCCTCATGCGCTCTCCTGTTCCGACCCTGCCGCTTACCGGATACCTGTCCGCCTTCTCC  
CTTCGGGAAGCGTGCCGCTTCTCATAGCTCACGCTGTAGGTATCTCAGTTCGGTGTATGTCGATCGCTCCAAGCTGGGCTGTGTGCACTAACCCCCG  
TTCAGCCCGACCGCTGCGCCTTATCCGGTAACTATCGTCTTGAGTCCAACCCGGTAAGACACGACTTATCCCCCTGGGCAGCATCCCTGGTAACAGGA  
TTAGCAAAGCGAGATATGTAGGCGGTGCTACAGAGTCTTGGAGTGGGGCCCTAACTACGGTACACTAGAAGAACAGTATTTGGATCTGCGCTCTCCG  
AACCCGTTACCTTCTGAAAAAGAAATGGTAGGGCTTG

168

GGTGTGGTGAAACTTGGTCGAGTCTTACAAGTTTGATTAATATTTACATTCTAGTCATAATGACTTTGAATCTGAAACCAGAAACCAAACACAGCCGA  
AAGGAAACGTCGACCTGGACGAGGGCAAGGTTGTTGGTGATTGTCGTTGATAAAATTTTCGAGAGCGAGAACCTCCCCAAT

169

TTGTTTTGTTAGGTTTTGGGGTATAAGTGCAGTTTTGTTACACACATATATTGTGTGGTGGTGAAGTCTGGGCTTTGAGTGTACCTGTCACTCGAATAGT  
GAACATTGTACCCAACAGGTGATTTATCAACCACACACCAACACACCCAACACAAATCGTCGACCTGCAGGCATGCAAGCTTGGCACTGGCCGTCGT  
TTTACAACGTCGTGACTGGGAAAACCCTGGCGTT

170

TTTTGTTGGGCCAACTTTATACTTCAGCATTAAAGTTTAAAGTCTGCTAAATTTCTAACTTGTTTCAGAGTTGTTAGATTTTATTTTGAGGTCTATTTCCAATT  
GCTTTGGTATCCATGACCCTTACAACAAATTAGACATTTACTGAATGCTTATTTTTCACTATCCTTAAGTCAGTACATTTCAAGGTAGAAAGTTATATCAAG  
CACATGAAAAGTCTTGAGTAGCTTCATTTATAAATACTCCCATATATAAATATGCTTAAAAGTTTGATTTTTAGAAACAGTTGTGTGTTTTTAAAAACCA  
ACCCCCCAAACACACCCAACACAAATCGTCGACCTGCAGGCATGCAAGCTTGGCACTGGCCGTCGTTTTACAACGTCGTGACTGGGAAAACCCTGGC  
GTT

171

GTGGTGGGGCCGAGGCAGGCAGATCACAAGGTCAGGAGTTTGAGACCAGCCTGACCAACATGGTGAAACCCCGTCTCTACTATAAATACAAAACT  
AGCCAGGCATGGTGACACACGCCTATAATTTAGCTACTTGGGAGGCTGAGGCAGGAGAATCGCTTGAACCCGGGAGGCAGAGGTTGCAGTGAGCCG  
AGATTGTGCCATTACAATCCAGCCTGGGCGACAGAGTGAGACTCCGTCTCGGCAAAAAACCCCAAACACACCCAACACAAATCGTCGACCTGCAGG  
CATGCAAGCTTGGCACTGGCCGTCGTTTTACAACGTCGTGACTGGGAAAACCCTGGCGTT

172

TTTTGTTGGGCCAACTTTATACTTCAGCATTAAAGTTTAAAGTCTGCTAAATTTCTAACTTGTTTCAGAGTTGTTAGATTTTATTTTGAGGTCTATTTCCAATT



GCTTTGGTATCCATGACCCTTACAACAAATTAGACATTTACTGAATGCTTATTTTTCACTATCCTTAAGTCAGTACATTTACAGGGTAGAAGTTATATCAAG  
CACATGAAAAGTCTTGAGTAGCTTCATTTATAAATACTCCCATATATAAATATGCTTAAAAGTTTGATTTTTAGAAACAGTTGTGTGTTTTTAAAAACCAA  
ACCCCCAAACACACCCCAACACAAATCGTCGACCTGCAGGCATGCAAGCTTGGCACTGGCCGTCGTTTTACAACGTCGTGACTGGGAAAACCCTGGC  
GTT

173

GGAGCCGAGGTGGGTGGATCACTTGAGGTCAGGAGTTTAAGACCAACCTAACCAACATGGCGAAACCCCGTCTCTACTAAAAATACAAAATTAGCC  
AGGCATGGTGGTGGGCGCCAGTAATACTGGCTACTCAGGAGGCTGTGGCAGGAGAATCCCTTGAACCCAGGAGGGGGGGTTGCAGTGAGCCGAGATC  
GCACCACTGTACTCCAGCTTGGGTGACAGAGCAAGACTCCAACTCAAAAAAAAAAGAAAAGAAAAGAAAATTGTGTGGAATTACAGATTTTAGTT  
TTTTGTTTGTTTTTTCTAAAAAAAAAAAAACAAACACTTTTCCTAATGTATTACAAAAAGACGCCCAAAAATGTTGTGGAAAAAATTTATAATACTAAAA  
AAAAATAGTAGGCCAGGCAGGCACCAAACACACCCAAACACAAATCGTCGACCTGCAGGCATGCAAGCTTGGCACTGGCCGTCGTTTTACAACGTCGT  
GACTGGGAAAACCCTGGCGTT

174

TGTTTTGTGGTCCCTCACTTTCTCCCATTTGCATCTGTAGGGCACTTTATTTTAAATGCTGGATTCTTTTGCTCCAGAAAGTGGGAACTGGTGGGGA  
GGAGGGCCATGGATCTTTTGCTGTCAAATAGGTTAAAGTCAAAGAGTCTTCATGGACACAGCTGTAAACCAGTGTTAGTTGTCCATATTGGCAGTGTG  
TCCTTGTCTCATTGCCTTGAAATTTAGAGTTAAAGCAGGATTAAGCTTTTTTGTTCCTTAGTTTTGAAAAATAACCTTTTTTATTATTGTAATAACTTTT  
CTTTCACCACCTCAGAGTTTCTCAGTGGACATAGCTCATCTTCCTTTACACCTTTTGCTTCTCTCAGGCCAGTGAGAGACTGTCTTATTTGAACACCAC  
CCAAACACACCCAAACACAAATCGTCGACCTGCAGGCATGCAAGCTTGGCACTGGCCGTCGTTTTACAACGTCGTGACTGGGAAAACCCTGGCGTT

175

TGTGAGCCATGGTGTAAGTCCAATTAAGTGCCTTTAAAACAAGAGTAAGGACAAATTATAGATAGAGATTTCCAATTCAAGAATTTCTTTAATTTCTGA  
GAGACAGGGTCTCACTCTGTTGCCAGGCTGGAATGCAATGGCGCAATCATGGCTCACTGCAGCCTCGACCTCCTGGGCTCAGGCAATCCTCTCACCG  
CACCCCCCCCCCAACACACCCAAACACAAATCGTCGACCTGCAGGCATGCAAGCTTGGCACTGGCCGTCGTTTTACAACGTCGTGACTGGGAAAA  
CCCTGGCGTT

176

GGGTTTGTTCGCTTACTTTGGTAAAGGGAAGGGAGGGATGTGTCCCGTACTATGTGGCAAAGTGAACCTTAATACAAGCCAATGCTCTCTCCCCATCAC  
GTACTTGTGATAGATGACCTCTTTACTTGTGAGTGGTTGCACCCTTACAATGATAAGTCTGGACTGCCTTCCTGTGACAAGGCAATGACGAGCAGCTT  
CTTGTCCTTGTTCACCAGCTGGCGTGTGGCCTTGACCTGAGACATTTCTTTCTTTTTTTGTTTTTGTGTTTTGTGTTTGGATGGGGTTACTGACTTGT

TGCCCTCTCTGGAGTGCAATGGAACAGACTAGGCTCACCTATGCCTCCCCCTCCTGAGTTT

177

AGACTTCAGTTGCTCACTTTCAATAATGGATAGAAGATCTAGGTAAAAGATAACTAAGGAAATAGAGGATTGGAACAAAAACACCAAACACACCCAAC  
ACAAATCGTCGACCTGCAGGCATGCAAGCTTGGCACTGGCCGTCGTTTTACAACGTCGTGACTGGGAAAACCCTGGCGTT

178

GTTTACATTGTTGCTTGAAAGGTTCTAATATCATCTAATATCTCAGTAGCTATGGAATATGAATAAACTAAAGAGAAGTCATCCATTCTATTTTCTCTAAA  
TTTTAAAACCACTCCAGATGGCTCCTCATTTATGGACACACAAACAGAAAAAATCAAATAAAATATAATGACAACTCAGCATTGATATGCAAATAA  
GTACATAGTTTTGAAAAATAGTTACTCTGCAACAGATGCGCAACATTTAAAAATATCTTTGTGACAATCTTAATAAATTTAAAAATATAGACCAACCAC  
ACCAAACACACCCAACACAAATCGTCGACCTGCAGGCATGCAAGCTTGGCACTGGCCGTCGTTTTACAACGTCGTGACTGGGAAAACCCTGGCGTT

179

GGTGTGGTTTATTTGCCAAAGCTAAGGACGCACACTGTGACACAGCCTCAGGAGGTCCTGATGACATGTGTCCAAGGTGGGTTCGGGGCACAGCTTGG  
TTTTACACATTTAGGGAGACAAGAGACATCAATCAATATATTTAAGAAGTACATTGGTTTGTCCAAAAAGGTGGGTGCCAGGCCTCTGAGCCCAAGCTA  
AGCCATCATAACCCCAACCCCAACCAACACCAAAACACACCCAACACAAATCGTCGACCTGCAGGCATGCAAGCTTGGCACTGGCCGTCGTTTTACA  
ACGTCGTGACTGGGAAAACCCTGGCGTTA

180

GCCATATGTACCTGATTACGATTCGAGCTCGGTACCCGGGGATCCTCTAGAGATTTGTGTTGGGTGTGTTTGGGGTGTGGTTTATTTGCCAAAGCTAAGG  
ACGCACACTGTGACACAGCCTCAGGAGGTCCTGATGACATGTGTCCAAGGTGGGTTCGGGGCACAGCTTGGTTTTACACATTTAGGGAGACAAGAGAC  
ATCAATCAATATATTTAAGAAGTACATTGGTTTGTCCAAAAAGGTGGGTGCCAGGCCTCTGAGCCCAAGCTAAGCCATCATAACCCCAACCCCAACCA  
ACACCAAACACACCCAACACAAATCGTCGACCTGCAGGCATGCAAGCTTGGCACTGGCCGTCGTTTTACAACGTCGTGACTGGGAAAACCCTGGCGT

T

181

GCATTGACATGATTACGATTCGAGCTCGGTACCCGGGGATCCTCTAGAGATTTGTGTTGGGTGTGTTTGGGGGGTGTGTGTGTATGTGATTTTGTGTGT  
GCACTAATACACATGTAGGAGACCAAGGCAGGAGAATCACATATCCAAAGCCAAGCTGCCTACCAGGTTGCACAGTAAATTACAGGTCATGGCAGGCT  
AAAGAGGTACCCTGTCTTTAAAACCCAAACAAAAGAAATCTATATCTTACCAACAACCCCAAGAAACAACCATTTTGCACACCACATTTTCATATGTATA  
AGTTAATTAATGACATTGAAACACACACATTAGTTTTTCTACTGTATTTTTTTTTTACATGAGTCATAGATAGTTAACTCAGGCACTATTCTGGCCATA  
CATTCCCATGTCCATTGCTTCTTCAACAGCTATTTCTTTAACAATGTTAGTGATTTCTATCATCTCGCTATTATTGATAAACTATAATTA AAAAGCAGAC

GATTCTCACAAAAACACCAAACACACCCAACACAAATCGTCGACCTGCAGGCATGCAAGCTTGGCACTGGCCGTCGTTTTACAACGTCGTGACTGGG  
AAAACCCTGGCGTTTTTCGGGGAAAT

182

GGACATGACATGATTACGATTCGAGCTCGGTACCCGGGGATCCTCTAGAGATTTGTGTTGGGTGTGTTTGGTGGTTTTTTTTGTGGAGATGGGATTTTGCC  
ATGTTTCCCAGGCTGGTCACAAATTCCTAGGCTCAAGCAATCTTCCCACCTTGACCTCCCAAAGTGTTGGAATGATAGGTGTGAGCCACCGTGCCTGGC  
CCATATGGTTATTTTTGGTGAAGAAATTTTCAGGTACATGGTCATCCTCCACACTAGTTAGCCATTAAGTTTTCACTTAAAGCTCTACATCAGGGATCATA  
GCAAGTCAGGTAAACAGTAAGACAAGCAAAGGCTTTAGCTTACTTAGAAAAGCAACTCAAATACTGTAGTTTTCTGTTTTCTAGAAGGCAGGCTAAAT  
ATAATTGCATGGTAAGTTCTAAGTTTTCAAATAGTATCAGAAAAATAAGGAGGCAAGGGTAGTGACAGCATTGGATTGACCTTGTAGATTCTGATAC  
TGTAAACTTTTCTTAATTTAATAATTTCACTCTCTTAAGATTTGTCCACAACATTTCATATTCTAAATAAACCACATCCTTCCATTACTGGAAGGGATATTAG  
AAATCAGTGCATTCAACCAACACCCAACACACCCAACACAAATCGTCGACCTGCAGGCATGCAAGCTTGGCACTGGCCGTCGTTTTACAACGTCGT  
GACTGGGAAAACCCTGGCGTT

183

GCAATGACATGATTACGATTCGAGCTCGGTACCCGGGGATCCTCTAGAGATTTGTGTTGGGTGTGTTTGGGTTGTTGGTTTTATTTATTGTAAGTACACTGT  
AGCTGTCCCTCAGACACTCCAGAAGAGGGAGTCAGATCTCATTACGGATGGTTGTGAGCCACCATGTGGTTGCTGGGATTTGAACTCCTGACCTTCGGA  
AGAGCAGTCGGGTGCTCCTTCCCCTGAGCCATCTCACCAGCCCATGGTGTAATTTCTAAAGGTAAGAAGGGAGATAGTCCCTTTCTCTGCCTACCAT  
ACTACCCCACTCCCAACATCCCTAAGCAGAGGGTCAAACATAAATGGCTTCATCTTGTTAATGTAACTTTAAAAGCCAGGCGGTCACTTTTCAGAGGA  
GATAGCTGCACTCCTACAGTTAGTTGCCTTGGCTAGTCCAGTTTCCACTGGAGTGCGGCAGGACTGCGGTCTGTGCTGCTCTCCGTGCTCTTCCCAGT  
GAGGGAGACCCCGCCTTCATTCACACTCAGCTTCTGGGCATCAACTATGTGAGGAGAGTCTATGAATCTTACAAGAAAGCAACCAGCTCTCAGAAAA  
CACTACCAAACACACCCAACACAAATCGTCGACCTGCAGGCATGCAAGCTTGGCACTGGCCGTCGTTTTACAACGTCGTGACTGGGAAAACCCTGG  
CGTT

184

TTTGTGGGGGTGCGAGGTGGGTGGATCACCTGAAGTCAAGAATTTGAGAGCATCCTGGCCAACATGGCAAACCATGTCTCTACTAAAAATACAAAAAC  
TAGCCAGGCATGATGGTGCATGCCTATAGTCCCAGCTACTTGGGAGGCTGAGGCAGAAGAATCGCTTGAACCCTGGAGGCAGAGGTTGCAGTGAGCC  
AAGGTCGTGCCACCGTACTCCAGCCTGCGCAACAGAGTGAGACAACATCCCCCAAAAAAAAAAATCAGGAAAACAGTTCATGATCTGAAGGAAAA  
AAAACAACCAAACACACCCAACACAAATCGTCGACCTGCAGGCA

185

TGTTAGTTTGTGACCCCTAAGATAGATGATGCTAATATACATTTCTTGGTATAAACTTTCCTGGCATTCCCTAAACTAACTCTTTTTAGGCATGGTCTATT  
AAAAGTATAGTAAAAGGCACTGATAACTTTCTCATCACAGTGAACAGGCAACCTACAGAATGGGAGAAAATTTTTGCAATCTCCCCCACCACCAAAC  
ACACCAACACACCAAACACACCCAACACACCAAACACACCCAACACAAATCGTCGACCTGCAGGCATGCAAGCTTGGCACTGGCCGTCGTTTTACA  
ACGTCGTGACTGGGAAAACCCTGGCGTT

186

GACCCCTAAGATAGATGATGCTAATATACATTTCTTGGTATAAACTTTCCTGGCATTCCCTAAGCTAACTCTTTTTAGGCATGGTCTATTAAAAGTATAGTA  
AAAGGCACTGATAACTTTCTCATCACAGAGAACAAGCAACCTACAGAATGGGAGAAAATTTTTGCAATCTCCCCCACCACCAAACACACCCAACAC  
ACCAAACACACCCAACACACCAAACACACCCAACACAAA

187

TTTGTGGGGTTCGAGGTGGGTGGATCACCTGAAGTCAAGAATTTGAGAGCATCCTGGCCAACATGGCAAACCATGTCTCTACTAAAAATACAAAAAC  
TAGCCAGGCATGATGGTGCATGCCTATAGTCCCAGCTACTTGGGAGGCTGAGGCAGAAGAATCGCTTGAACCCTGGAGGCAGAGGTTGCAGTGAGCC  
AAGGTCGTGCCACCGTACTCCAGCCTGCGCAACAGAGTGAGACAACATCCCCCAAAAAAAAAAATCAGGAAAACAGTTCATGATCTGAAGGAAAA  
AAAACAACCAAACACACCCAACACAAATCGTCGACCTGCAGGCATGCAAGCTTGGCACTGGCCGTCGTTTTACAACGTCGTGACTGGGAAAACCCTG  
GCGTT

188

TGTTTGTGGGGCCTGGTTACCAGGTGACAGTTGCTGTAAGTTTTAATCCAACCTTCTCTATTGAAAAATACACTATCTTGCAACTGCCTTGAAGCTGCCAC  
AAAAATACATTTTTAAAGGAGTAATAAACAATATCAAGAAATAGCCTTCATAAAATTGTCAGTATTTAAACCCCCCAAACACACCCAACACAAATC  
GTCGACCTGCAGGCATGCAAGCTTGGCACTGGCCGTCGTTTTACAACGTCGTGACTGGGAAAACCCTGGCGTT

189

TTTTCTGTTCTGTGTTAGTTTGCTAAGGATAATGGCCTCCAGCTCCATCCATATCCCTGCAAAGGACATGATCTCATTCTTTTTATGGCTGTATACTATT  
CCACAGTGTATATGTAGTATATATTCTCAAATATGTGAGTGTACACCTCCTTTCCCTTTGGGCCCAACTGTCTCTATTTTGTCTGGGTCTGACAAAAGAGAT  
TTCATCTTGGTATATGAAACATTCAGTGCACAATATGCAAACCTTTTTGCCTGTCTGATGTTGACACTATATCATCCAAGACTATTCTTATGTCAATGTCCTT  
AAGACAGTTCAGGAAAAAATGGATGTAGTACAGAAACATATGGAAAATTGTCTCACAGGATCCCACCTCATTTTATGCAATGCAGGTTCTAGGTTCTT  
ATTAGAAAGTGTATCTCCTTCTTCTTCTGACTGTATGTCATTCACCTAGACCATGAAGGGTTTATATTTGACCATTCTCAAGTCAGAAATTGATCCTG  
ACATAGGCATAACATTTAAAGCCCCACCCCAAAACACACCCAACACAAATCGTCGACCTGCAGGCATGCAAGCTTGGCACTGGCCGTCGTTTTACAA

CGTCGTGACTGGGAAAACCCTGGCGTT

190

GTTTACATTGTTGCTTGAAAGGTTCTAATATCATCTAATATCTCAGTAGCTATGGAATATGAATAAACTAAAGAGAAGTCATCCATTCTATTTTCTCTAAA  
TTTTAAAACCACTCCAGATGGCTCCTCATTTATGGACACACAAACAGAAAAAATCAAATAAAATATAATGACAACTCAGCATTTGATATGCAAATAA  
GTACATAGTTTTGAAAAATAGTTACTCTGCAACAGATGCGCAACATTTAAAAATATCTTTGTGACAATCTTAATAAATTTAAAAATATAGACCAACCAC  
ACCAAACACACCCAACACAAATCGTCGACCTGCAGGCATGCAAGCTTGGCACTGGCCGTCGTTTTACAACGTCGTGACTGGGAAAACCCTGGCGTT

191

GGGTTGTATACTTGTTTCTGGAAGTTTTCCACCTCATTTCTGGCTGAAGTGAATCCTTGAAGAACCAGGAGGGCTGAGCAGAAAACAAATATTTGCCAC  
TGCTTTCAGATCCATCCCTCTGTGGGAACAATCTGGAGAACTGCCTTTTTCATATTTTCAGTAAAAAAAATTCCATATTCATGCCATTTCTGTATTATG  
CAAAACCCCAACCAACACACCCAACACAAATCGTCGACCTGCAGGCATGCAAGCTTGGCACTGGCCGTCGTTTTACAACGTCGTGACTGGGAAAAC  
CCTGGCGTT

192

GGTGTGGGTTCTCTCATCATCACTGAGCTCCATCCAGGGAACCTGGGATATCTCCCCAAGGGAAAATAAAATGGAGCCAATTAGCCCATCCCTCAAAC  
ATCTATACAGACCCCTGTGTAAACAACACACACACAGCCAGCCAGGCCTTGAGGGTCATCAGGAGGGATAGGCCTCTGTCTCCCTCACCCAGGGGACC  
TCAGTATAGTACAAGGAACCTAAAAAAGCAACTGTCGATCCCTCCATTCTGCTGGTATGGGGGTGTATGCCTATAGTCTTGTATTCAAGAGGCTGAGGC  
AGGAGGATGGCTAGCCTGGGTTGCAAAGAAAAGACATCACACTTTTCTGCTACCCATAGGTAGCCTTTTTCTTCTCTCTCTCTCTCTCTCTCTCTCTC  
TCGCTCTCGCTCTCCTTGCTTTCTTAATCAGGACTGAATCTAGAATACTTCAAAGACTTTGTTCATGCTCTTATGGGAATTTCTTTTCATTCATCACAGATA  
CACATGGTGGTAACAGAGATGCAGGGATAGCTGAGCTTGTGAAGGCCAAGCTCAGTTCCCACAACAACCCCAAACACACCCAACACAAATCGTCG  
ACCTGCAGGCATGCAAGCTTGGCACTGGCCGTCGTTTTACAACGTCGTGACTGGGAAAACCCTGGCGTT

193

GGGGTTGTGTGTATGTGATTTTGTGTGTGCACTAATACACATGTAGGAGACCAAGGCAGGAGAATCACATATCCAAAGCCAAGCTGCCTACCAGGTT  
GCACAGTAAATTACAGGTCATGGCAGGCTAAAGAGGTACCTGTCTTTAAAACCCAAACAAGAAATCTATATCTTACCAACAACCCCAAGAAACAA  
CCATTTTGCACACCACATTTTCATATGTATAAGTTAATTAATGACATTGAAACACACACATTAGTTTTTCTACTGTATTTTTTTTTTACATGAGTCATAGAT  
AGTAACTCAGGCACTATTCCTGGCCATACATCCCATGTCCCATGCTTCTTCAACAGCTATTTCTTTAACAATGTTAGTGATTTCTATCATCTCGCTATT  
ATTGATAACACTATAATTA AAAAGCAGACGATTCTCACAAAACACCAAACACACCCAACACAAATCGTCGACCTGCAGGCATGCAAGCTTGGCACTG  
GCCGTCGTTTTACAACGTCGTGACTGGGAAAACCCTGGCGTT

194

GTGGTGGGGGCGAGGCAGGCAGATCACAAGGTCAGGAGTTTGAGACCAGCCTGACCAACATGGTGAAACCCCGTCTCTACTATAAATACAAAACT  
AGCCAGGCATGGTGACACACGCCTATAATTTTCAGCTACTTGGGAGGCTGAGGCAGGAGAATCGCTTGAACCCGGGAGGCAGAGGTTGCAGTGAGCCG  
AGATTGTGCCATTACAATCCAGCCTGGGCGACAGAGTGAGACTCCGTCTCGGCAAAAAAACCCCAAACACACCCAACACAAATCGTCGACCTGCAGG  
CATGCAAGCTTGGCACTGGCCGTCGTTTTACAACGTCGTGACTGGGAAAACCTGGCGTT
